# Supplementary material for: Unsupervised domain adaptation methods for cross-species transfer of regulatory code signals
Source: Front Big Data. 2023 Mar 30;6:1140663. doi: 10.3389/fdata.2023.1140663 (PMC10101332; doi:10.3389/fdata.2023.1140663)
Supplement: Supplementary file 1 [file Table_1.XLSX]

## Sheet: Histones - experiment counts
	Histone mark (All cell types AND threshold=05)	ce10	dm3	hg19	mm9	total_assemblies	total_experiments
	H3K36me1	6	3	2	2	4	17
	H3K79me1	2	1	4	17	4	28
	H4	6	2	30	4	4	46
	H3K9me1	3	3	24	13	4	47
	H3K14ac	2	6	22	14	4	48
	H3K27me1	10	4	19	38	4	75
	H3K27me2	6	8	15	57	4	90
	H3K79me3	5	7	38	38	4	92
	H4K8ac	4	1	26	58	4	93
	H3K18ac	2	7	78	33	4	124
	H3ac	4	20	78	28	4	134
	H4K20me1	30	12	65	23	4	134
	H3K36me2	4	14	75	75	4	172
	H4K16ac	9	64	61	62	4	200
	H3K79me2	3	3	256	119	4	385
	H3K9me2	27	43	121	300	4	495
	H3	33	21	200	328	4	586
	H3K9ac	1	32	350	451	4	838
	H3K4me2	6	40	483	679	4	1212
	H3K36me3	69	53	491	705	4	1322
	H3K9me3	108	116	770	840	4	1838
	H3K4me1	22	64	1497	1797	4	3384
	H3K27me3	38	227	2044	3036	4	5349
	H3K4me3	90	198	3318	3322	4	6932
	H3K27ac	18	167	5410	3771	4	9370
	H2AK5ac	3	0	3	6	3	15
	H3K36ac	2	0	7	3	3	15
	H3K23ac	1	0	25	2	3	31
	H2Bub	0	13	24	38	3	78
	H4K5ac	0	3	19	55	3	80
	H4ac	0	6	10	78	3	97
	H3.3	0	1	59	125	3	188
	H3K9K14ac	0	4	85	132	3	224
	H3K14me3	0	0	2	1	2	5
	Pan lysine acetylation	0	0	1	2	2	5
	Pan lysine crotonylation	0	0	1	2	2	5
	H1t	0	0	2	3	2	7
	H3R17me2	0	0	3	2	2	7
	H2AK9ac	0	0	4	2	2	8
	macroH2A1.2	0	0	6	2	2	10
	H3R26cit	0	0	8	1	2	11
	H4K91ac	0	0	4	5	2	11
	H2BK120ac	0	0	5	5	2	12
	H2BK20ac	0	0	1	9	2	12
	H4K20me2	0	0	8	2	2	12
	H3R2me2	0	0	10	1	2	13
	H2B	0	0	6	6	2	14
	macroH2A2	0	0	2	10	2	14
	H2A.Zac	0	0	10	3	2	15
	H1	0	10	0	4	2	16
	H3K18cr	0	0	6	8	2	16
	H2BK5ac	0	0	8	10	2	20
	H2BK120ub	0	0	2	20	2	24
	H2Aub	0	0	2	21	2	25
	H3.3 K27M mutant	0	0	20	6	2	28
	H3K9acS10ph	4	0	0	22	2	28
	H3.1	0	0	3	24	2	29
	H3K4ac	0	0	25	5	2	32
	H3K56ac	0	0	14	16	2	32
	H3S10ph	2	0	0	30	2	34
	macroH2A1	0	0	21	14	2	37
	H4K20me3	0	0	43	18	2	63
	H2A.X	0	0	19	51	2	72
	H3K122ac	0	0	50	20	2	72
	H4K12ac	0	0	36	41	2	79
	H2A.XS139ph	0	0	87	66	2	155
	H2A.Z	0	0	104	133	2	239
	H2AK119Ub	0	0	70	212	2	284
	H1.0	0	0	1	0	1	2
	H1.4	0	0	1	0	1	2
	H1.4K34ac	0	0	1	0	1	2
	H1.X	0	0	1	0	1	2
	H1K85ac	0	0	1	0	1	2
	H2	0	0	1	0	1	2
	H2A.B	0	0	0	1	1	2
	H2BP1me1	0	0	1	0	1	2
	H2S112GlcNAc	0	0	0	1	1	2
	H3K122sc	0	0	1	0	1	2
	H3K26me3	0	0	0	1	1	2
	H3K4me	0	0	1	0	1	2
	H3K79homocysteine	0	0	0	1	1	2
	H3K9S10me3	0	0	0	1	1	2
	H3Kac	0	0	0	1	1	2
	H3R2me2K4me3	0	0	0	1	1	2
	H3T6ph	0	0	1	0	1	2
	H4K5K8K16ac	0	0	1	0	1	2
	Hand1	0	0	0	1	1	2
	hcp-3	1	0	0	0	1	2
	hcp-4	1	0	0	0	1	2
	macroH2A	0	0	0	1	1	2
	H1B	0	0	2	0	1	3
	H2A.Bbd1	0	0	0	2	1	3
	H2A.Z.1	0	0	2	0	1	3
	H2A.Z.2	0	0	2	0	1	3
	H2AK5sc	0	0	0	2	1	3
	H2AT120ph	0	0	2	0	1	3
	H2BK119ub	0	0	0	2	1	3
	H2BK12ac	0	0	0	2	1	3
	H3.5	0	0	2	0	1	3
	H3K18la	0	0	0	2	1	3
	H3K20me1	0	0	0	2	1	3
	H3K27me3S28ph	0	0	0	2	1	3
	H3K34me3	0	0	0	2	1	3
	H3K4bhb	0	0	0	2	1	3
	H3K4ox	0	0	2	0	1	3
	H3K5ac	0	0	2	0	1	3
	H3K79suc	0	0	2	0	1	3
	H3K9K14K18K23K27ac	0	0	2	0	1	3
	H3S10phK14ac	0	0	0	2	1	3
	H3T11ph	0	0	2	0	1	3
	H3T45ph	0	0	2	0	1	3
	H3mm11	0	0	0	2	1	3
	H3mm12	0	0	0	2	1	3
	H3mm13	0	0	0	2	1	3
	H3mm16	0	0	0	2	1	3
	H3mm7	0	0	0	2	1	3
	H3mmT	0	0	0	2	1	3
	H4K12me1	0	0	2	0	1	3
	H4K4me3	0	0	2	0	1	3
	H4K5bu	0	0	0	2	1	3
	H4K8bhb	0	0	0	2	1	3
	H4K8bu	0	0	0	2	1	3
	H4tetraac	2	0	0	0	1	3
	Hoxa9	0	0	0	2	1	3
	WAPL	0	0	2	0	1	3
	H3.2	0	0	0	3	1	4
	H3.3S31ph	0	0	0	3	1	4
	H3K23me1	3	0	0	0	1	4
	H3K23me2	3	0	0	0	1	4
	H3K9bhb	0	0	0	3	1	4
	Hmga2	0	0	0	3	1	4
	H2AK118ub	0	4	0	0	1	5
	H2AS40GlcNAc	0	0	0	4	1	5
	H3.6	0	0	4	0	1	5
	H3.7	0	0	4	0	1	5
	H3.Y	0	0	4	0	1	5
	H3K14bu	0	0	0	4	1	5
	H3K14pr	0	0	0	4	1	5
	H3K27cr	0	0	4	0	1	5
	H3K64ac	0	0	0	4	1	5
	H3K9Kac	0	0	4	0	1	5
	H3R8me2	0	0	4	0	1	5
	H3S57ph	0	0	4	0	1	5
	TH2BS11ph	0	0	0	4	1	5
	H2BS112GlcNAc	0	0	5	0	1	6
	H3.3B	0	0	5	0	1	6
	H1.5	0	0	6	0	1	7
	H4R3me2	0	0	6	0	1	7
	H2A.VS137ph	0	8	0	0	1	9
	H3S28ph	0	0	0	8	1	9
	H4K5K8K12K16ac	0	0	8	0	1	9
	H4R3me2s	0	0	0	8	1	9
	htz-1	9	0	0	0	1	10
	H2A	0	0	0	10	1	11
	H4K5K8ac	0	0	10	0	1	11
	H1.2	0	0	11	0	1	12
	H2BK15ac	0	0	11	0	1	12
	H2Bac	0	0	0	11	1	12
	H2BK120ub1	0	0	15	0	1	16
	H3S31ph	0	0	0	16	1	17
	CENPA	0	0	17	0	1	18
	H3K23me3	20	0	0	0	1	21
	H2A.ZK4K7K11ac	0	0	28	0	1	29
	H2AK120Ub	0	0	32	0	1	33
	H2A.V	0	59	0	0	1	60
	H2AK119ub1	0	66	0	0	1	67

## Sheet: Histones - exp. counts
	Histone mark (All cell types AND threshold=05)	ce11	dm6	hg38	mm10	total_assemblies	total_experiments		Histone mark (All cell types AND threshold=05)	ce11	dm6	hg38	mm10	total_assemblies	total_peaks
	H3K27ac	18	185	5409	3771	4	9387		H3K27ac	61924	893121	140557641	75103898	4	216616588
	H3K4me3	90	215	3318	3322	4	6949		H3K4me3	417532	1240894	68821564	76658049	4	147138043
	H3K27me3	38	252	2035	3036	4	5365		H3K4me1	13730	567575	42879408	32712644	4	76173361
	H3K4me1	22	74	1497	1797	4	3394		H3K4me2	36404	344267	16974751	20713556	4	38068982
	H3K9me3	108	122	770	840	4	1844		H3K27me3	58609	581538	9613987	9741229	4	19995367
	H3K36me3	69	59	491	705	4	1328		H3K9ac	1621	189443	6364344	7299205	4	13854617
	H3K4me2	6	40	483	679	4	1212		H3K9me3	143052	866802	4639434	3824549	4	9473841
	H3K9ac	1	33	350	451	4	839		H3K36me3	359099	433095	1840399	2605565	4	5238162
	H3	31	57	200	328	4	620		H3	55110	216205	1805781	796130	4	2873230
	H3K9me2	27	42	121	300	4	494		H3ac	2041	172589	1263838	481569	4	1920041
	H3K79me2	3	4	256	119	4	386		H3K18ac	1625	21375	1450493	402208	4	1875705
	H4K16ac	9	73	61	62	4	209		H3K79me2	9903	37483	1401404	405450	4	1854244
	H3K36me2	4	14	75	75	4	172		H3K9me2	200635	182250	380387	263390	4	1026666
	H3ac	4	25	78	28	4	139		H4K16ac	10627	327190	278978	246131	4	862930
	H4K20me1	30	12	65	23	4	134		H4K8ac	3237	3469	362133	467158	4	836001
	H3K18ac	2	11	78	33	4	128		H3K14ac	1494	78438	186559	154564	4	421059
	H3K27me2	6	12	15	57	4	94		H3K79me3	22211	55409	176699	165369	4	419692
	H4K8ac	4	2	26	58	4	94		H4	17101	22054	193665	94904	4	327728
	H3K79me3	5	7	38	38	4	92		H3K36me2	11250	66117	143028	93425	4	313824
	H3K27me1	10	6	19	38	4	77		H3K27me2	2600	57279	8585	147543	4	216011
	H4	6	10	30	4	4	54		H4K20me1	42305	48716	56711	47326	4	195062
	H3K14ac	2	9	22	14	4	51		H3K27me1	6035	8770	30908	74058	4	119775
	H3K9me1	3	4	24	13	4	48		H3K9me1	2393	20588	18650	29058	4	70693
	H3K79me1	2	3	4	17	4	30		H3K79me1	574	12058	374	17452	4	30462
	H3K36me1	6	4	2	2	4	18		H3K36me1	5095	5884	1040	5493	4	17516
	H3K9K14ac	0	4	85	132	3	224		H3K9K14ac	0	24294	1695873	2445641	3	4165811
	H3.3	0	1	59	125	3	188		H4ac	0	66479	89922	1455701	3	1612105
	H4ac	0	6	10	78	3	97		H4K5ac	0	7878	172408	643051	3	823340
	H4K5ac	0	4	19	55	3	81		H3.3	0	5894	415497	370677	3	792071
	H2Bub	0	13	24	38	3	78		H3K36ac	16707	0	159746	28677	3	205133
	H3K23ac	1	0	25	2	3	31		H2Bub	0	64084	17429	60255	3	141771
	H2B	0	1	6	6	3	16		H3K23ac	681	0	85416	4357	3	90457
	H2AK5ac	3	0	3	6	3	15		H2AK5ac	23537	0	14724	24350	3	62614
	H3K36ac	2	0	7	3	3	15		H2B	0	3113	6611	1884	3	11611
	H2AK119Ub	0	0	70	212	2	284		H2A.Z	0	0	1843291	1632485	2	3475778
	H2A.Z	0	0	104	133	2	239		H3K122ac	0	0	993187	334823	2	1328012
	H2A.XS139ph	0	0	87	66	2	155		H4K12ac	0	0	768673	250950	2	1019625
	H4K12ac	0	0	36	41	2	79		H3K56ac	0	0	433278	161010	2	594290
	H3K122ac	0	0	51	20	2	73		H2AK119Ub	0	0	90731	457976	2	548709
	H2A.X	0	0	19	51	2	72		H2A.XS139ph	0	0	312575	103795	2	416372
	H4K20me3	0	0	43	18	2	63		H2BK5ac	0	0	169767	243962	2	413731
	macroH2A1	0	0	21	14	2	37		H2A.Zac	0	0	246139	117440	2	363581
	H3S10ph	2	0	0	30	2	34		macroH2A1	0	0	62286	282239	2	344527
	H3K4ac	0	0	25	5	2	32		H3K4ac	0	0	245324	55266	2	300592
	H3K56ac	0	0	14	16	2	32		H2BK20ac	0	0	32346	124056	2	156404
	H3.1	0	0	3	24	2	29		macroH2A1.2	0	0	6511	142449	2	148962
	H3.3 K27M mutant	0	0	20	6	2	28		H2BK120ac	0	0	70674	70782	2	141458
	H3K9acS10ph	4	0	0	22	2	28		H4K20me3	0	0	77758	36478	2	114238
	H2Aub	0	0	2	21	2	25		H3K18cr	0	0	45889	56731	2	102622
	H2BK120ub	0	0	2	20	2	24		H3R26cit	0	0	97308	94	2	97404
	H1	0	15	0	4	2	21		Pan lysine crotonylation	0	0	15238	77913	2	93153
	H2BK5ac	0	0	8	10	2	20		H2A.X	0	0	34418	51313	2	85733
	H3K18cr	0	0	6	8	2	16		H3.3 K27M mutant	0	0	71362	11243	2	82607
	H2A.Zac	0	0	10	3	2	15		H4K91ac	0	0	30427	47571	2	78000
	macroH2A2	0	0	2	10	2	14		H2AK9ac	0	0	10278	59205	2	69485
	H3R2me2	0	0	10	1	2	13		H3K9acS10ph	4090	0	0	56213	2	60305
	H2BK120ac	0	0	5	5	2	12		macroH2A2	0	0	18494	36898	2	55394
	H2BK20ac	0	0	1	9	2	12		H3.1	0	0	2883	51681	2	54566
	H4K20me2	0	0	8	2	2	12		H2Aub	0	0	28056	16191	2	44249
	H3R26cit	0	0	8	1	2	11		H1	0	30201	0	1690	2	31893
	H4K91ac	0	0	4	5	2	11		H4K20me2	0	0	25691	4527	2	30220
	macroH2A1.2	0	0	6	2	2	10		H3S10ph	2857	0	0	16937	2	19796
	H2AK9ac	0	0	4	2	2	8		H3R2me2	0	0	12902	4847	2	17751
	H1t	0	0	2	3	2	7		H3K14me3	0	0	2705	7105	2	9812
	H3R17me2	0	0	3	2	2	7		H3R17me2	0	0	2392	6042	2	8436
	H3K14me3	0	0	2	1	2	5		H2BK120ub	0	0	193	6067	2	6262
	Pan lysine acetylation	0	0	1	2	2	5		Pan lysine acetylation	0	0	2820	2095	2	4917
	Pan lysine crotonylation	0	0	1	2	2	5		H1t	0	0	1565	457	2	2024
	H2AK119ub1	0	66	0	0	1	67		H2A.ZK4K7K11ac	0	0	696375	0	1	696376
	H2A.V	0	60	0	0	1	61		H4K5K8ac	0	0	291317	0	1	291318
	H2AK120Ub	0	0	32	0	1	33		H2A.V	0	273264	0	0	1	273265
	H2A.ZK4K7K11ac	0	0	28	0	1	29		H3K64ac	0	0	0	159984	1	159985
	H3K23me3	20	0	0	0	1	21		CENPA	0	0	157518	0	1	157519
	CENPA	0	0	17	0	1	18		H4K5K8K12K16ac	0	0	134173	0	1	134174
	H3S31ph	0	0	0	16	1	17		H2BK15ac	0	0	128858	0	1	128859
	H2BK120ub1	0	0	15	0	1	16		htz-1	69958	0	0	0	1	69959
	H1.2	0	0	11	0	1	12		H3K4ox	0	0	64360	0	1	64361
	H2BK15ac	0	0	11	0	1	12		H3K5ac	0	0	60235	0	1	60236
	H2Bac	0	0	0	11	1	12		H1.0	0	0	47849	0	1	47850
	H2A	0	0	0	10	1	11		H3.Y	0	0	42698	0	1	42699
	H4K5K8ac	0	0	10	0	1	11		H4K4me3	0	0	42428	0	1	42429
	htz-1	9	0	0	0	1	10		H3K9Kac	0	0	34905	0	1	34906
	H2A.VS137ph	0	8	0	0	1	9		H1.2	0	0	31523	0	1	31524
	H3S28ph	0	0	0	8	1	9		H2AK118ub	0	31304	0	0	1	31305
	H4K5K8K12K16ac	0	0	8	0	1	9		H4K8bu	0	0	0	29405	1	29406
	H4R3me2s	0	0	0	8	1	9		H3K34me3	0	0	0	24961	1	24962
	H1.5	0	0	6	0	1	7		H3K18la	0	0	0	22516	1	22517
	H4R3me2	0	0	6	0	1	7		H4K5K8K16ac	0	0	21295	0	1	21296
	H2AK118ub	0	5	0	0	1	6		H3K9bhb	0	0	0	19829	1	19830
	H2BS112GlcNAc	0	0	5	0	1	6		H3K4me	0	0	19424	0	1	19425
	H3.3B	0	0	5	0	1	6		H1.5	0	0	18307	0	1	18308
	H2AS40GlcNAc	0	0	0	4	1	5		H2BK120ub1	0	0	17499	0	1	17500
	H3.6	0	0	4	0	1	5		H3Kac	0	0	0	17416	1	17417
	H3.7	0	0	4	0	1	5		H4tetraac	16946	0	0	0	1	16947
	H3.Y	0	0	4	0	1	5		H4K5bu	0	0	0	15767	1	15768
	H3K14bu	0	0	0	4	1	5		H3R2me2K4me3	0	0	0	15489	1	15490
	H3K14pr	0	0	0	4	1	5		H2BK12ac	0	0	0	14896	1	14897
	H3K27cr	0	0	4	0	1	5		H3S28ph	0	0	0	14062	1	14063
	H3K64ac	0	0	0	4	1	5		H3K27cr	0	0	13315	0	1	13316
	H3K9Kac	0	0	4	0	1	5		H3S31ph	0	0	0	10910	1	10911
	H3R8me2	0	0	4	0	1	5		H2A.VS137ph	0	10602	0	0	1	10603
	H3S57ph	0	0	4	0	1	5		H3K23me3	10449	0	0	0	1	10450
	TH2BS11ph	0	0	0	4	1	5		H3K9K14K18K23K27ac	0	0	10100	0	1	10101
	H3.2	0	0	0	3	1	4		H2AK119ub1	0	9434	0	0	1	9435
	H3.3S31ph	0	0	0	3	1	4		H2AK120Ub	0	0	9244	0	1	9245
	H3K12ac	0	3	0	0	1	4		H3K26me3	0	0	0	6881	1	6882
	H3K23me1	3	0	0	0	1	4		H3K27me3S28ph	0	0	0	6322	1	6323
	H3K23me2	3	0	0	0	1	4		H2BS112GlcNAc	0	0	5817	0	1	5818
	H3K9bhb	0	0	0	3	1	4		H3S57ph	0	0	5506	0	1	5507
	Hmga2	0	0	0	3	1	4		H3.3B	0	0	4758	0	1	4759
	H1B	0	0	2	0	1	3		H3K79suc	0	0	4236	0	1	4237
	H2A.Bbd1	0	0	0	2	1	3		H3K14pr	0	0	0	3983	1	3984
	H2A.Z.1	0	0	2	0	1	3		H1.4K34ac	0	0	3816	0	1	3817
	H2A.Z.2	0	0	2	0	1	3		H3K12ac	0	3441	0	0	1	3442
	H2AK5sc	0	0	0	2	1	3		H3K4bhb	0	0	0	3089	1	3090
	H2AT120ph	0	0	2	0	1	3		H3R8me2	0	0	2888	0	1	2889
	H2BK119ub	0	0	0	2	1	3		H2Bac	0	0	0	2830	1	2831
	H2BK12ac	0	0	0	2	1	3		H1B	0	0	2744	0	1	2745
	H3.5	0	0	2	0	1	3		H4R3me2s	0	0	0	2635	1	2636
	H3K18la	0	0	0	2	1	3		H3.6	0	0	2445	0	1	2446
	H3K20me1	0	0	0	2	1	3		H2BP1me1	0	0	2383	0	1	2384
	H3K27me3S28ph	0	0	0	2	1	3		H2A.Z.1	0	0	2352	0	1	2353
	H3K34me3	0	0	0	2	1	3		H3.7	0	0	2291	0	1	2292
	H3K4bhb	0	0	0	2	1	3		H2A	0	0	0	2231	1	2232
	H3K4ox	0	0	2	0	1	3		H3K14bu	0	0	0	2231	1	2232
	H3K5ac	0	0	2	0	1	3		Hand1	0	0	0	2221	1	2222
	H3K79suc	0	0	2	0	1	3		H3T45ph	0	0	1906	0	1	1907
	H3K9K14K18K23K27ac	0	0	2	0	1	3		H3K23me1	1904	0	0	0	1	1905
	H3S10phK14ac	0	0	0	2	1	3	TRUE	H3K23me2	1901	0	0	0	1	1902
	H3T11ph	0	0	2	0	1	3		H3S10phK14ac	0	0	0	1883	1	1884
	H3T45ph	0	0	2	0	1	3		H4R3me2	0	0	1735	0	1	1736
	H3mm11	0	0	0	2	1	3		hcp-4	1677	0	0	0	1	1678
	H3mm12	0	0	0	2	1	3		H3mm16	0	0	0	1658	1	1659
	H3mm13	0	0	0	2	1	3		H2	0	0	1645	0	1	1646
	H3mm16	0	0	0	2	1	3		H3mm12	0	0	0	1606	1	1607
	H3mm7	0	0	0	2	1	3		H4K8bhb	0	0	0	1394	1	1395
	H3mmT	0	0	0	2	1	3		H3T11ph	0	0	1350	0	1	1351
	H4K12me1	0	0	2	0	1	3		TH2BS11ph	0	0	0	1335	1	1336
	H4K4me3	0	0	2	0	1	3		H3.3S31ph	0	0	0	1291	1	1292
	H4K5bu	0	0	0	2	1	3		H1.X	0	0	1211	0	1	1212
	H4K8bhb	0	0	0	2	1	3		H3.2	0	0	0	1186	1	1187
	H4K8bu	0	0	0	2	1	3		H3.5	0	0	1169	0	1	1170
	H4tetraac	2	0	0	0	1	3		Hoxa9	0	0	0	1071	1	1072
	Hoxa9	0	0	0	2	1	3		H2AK5sc	0	0	0	1038	1	1039
	WAPL	0	0	2	0	1	3		H3K122sc	0	0	925	0	1	926
	H1.0	0	0	1	0	1	2		H1.4	0	0	903	0	1	904
	H1.4	0	0	1	0	1	2		Hmga2	0	0	0	878	1	879
	H1.4K34ac	0	0	1	0	1	2		H2A.Bbd1	0	0	0	843	1	844
	H1.X	0	0	1	0	1	2		WAPL	0	0	816	0	1	817
	H1K85ac	0	0	1	0	1	2		H2A.B	0	0	0	769	1	770
	H2	0	0	1	0	1	2		H2A.Z.2	0	0	755	0	1	756
	H2A.B	0	0	0	1	1	2		H3mm11	0	0	0	730	1	731
	H2BP1me1	0	0	1	0	1	2		H3K9S10me3	0	0	0	727	1	728
	H2S112GlcNAc	0	0	0	1	1	2		macroH2A	0	0	0	726	1	727
	H3K122sc	0	0	1	0	1	2		H3mm13	0	0	0	723	1	724
	H3K26me3	0	0	0	1	1	2		H2BK119ub	0	0	0	703	1	704
	H3K4me	0	0	1	0	1	2		H2AS40GlcNAc	0	0	0	691	1	692
	H3K79homocysteine	0	0	0	1	1	2		H2AT120ph	0	0	674	0	1	675
	H3K9S10me3	0	0	0	1	1	2		H3mmT	0	0	0	660	1	661
	H3Kac	0	0	0	1	1	2		H4K12me1	0	0	608	0	1	609
	H3R2me2K4me3	0	0	0	1	1	2		H3T6ph	0	0	578	0	1	579
	H3T6ph	0	0	1	0	1	2		H3mm7	0	0	0	428	1	429
	H4K5K8K16ac	0	0	1	0	1	2		H1K85ac	0	0	408	0	1	409
	Hand1	0	0	0	1	1	2		H2S112GlcNAc	0	0	0	386	1	387
	hcp-3	1	0	0	0	1	2		hcp-3	385	0	0	0	1	386
	hcp-4	1	0	0	0	1	2		H3K79homocysteine	0	0	0	268	1	269
	macroH2A	0	0	0	1	1	2		H3K20me1	0	0	0	250	1	251

## Sheet: Experiment info
experimental_id	genome_assembly	antigen_class	antigen	cell_type_class	cell_type	no_peaks
SRX2339190	hg38	Histone	H3K27AC	Blood	B cells	28565		43648.7
SRX753157	mm10	Histone	H3K27AC	Blood	B cells	48873
SRX212429	hg38	Histone	H3K27AC	Blood	CD4+ T cells	40418
SRX3067412	mm10	Histone	H3K27AC	Blood	CD4+ T cells	47268
SRX183902	hg38	Histone	H3K27AC	Blood	CD8+ T cells	26830
SRX3802591	mm10	Histone	H3K27AC	Blood	CD8+ T cells	40042
SRX1614814	hg38	Histone	H3K27AC	Blood	Dendritic Cells	30371
SRX099253	mm10	Histone	H3K27AC	Blood	Dendritic Cells	37070
SRX1089819	hg38	Histone	H3K27AC	Blood	Erythroblasts	30787
SRX6797037	mm10	Histone	H3K27AC	Blood	Erythroblasts	48022
SRX1089818	hg38	Histone	H3K27AC	Blood	Hematopoietic Stem Cells	36645
SRX1293140	mm10	Histone	H3K27AC	Blood	Hematopoietic Stem Cells	50366
SRX1733637	hg38	Histone	H3K27AC	Blood	Macrophages	60430
SRX150851	mm10	Histone	H3K27AC	Blood	Macrophages	55517
SRX3421773	hg38	Histone	H3K27AC	Blood	Mast Cells	49773
SRX1456419	mm10	Histone	H3K27AC	Blood	Mast Cells	52798
SRX3734310	hg38	Histone	H3K27AC	Breast	Mammary glands	59366
SRX4169575	mm10	Histone	H3K27AC	Breast	Mammary glands	59891
SRX5376045	hg38	Histone	H3K27AC	Cardiovascular	Heart Ventricles	56685
SRX1308280	mm10	Histone	H3K27AC	Cardiovascular	Heart Ventricles	60767
SRX2869673	hg38	Histone	H3K27AC	Liver	Hepatocytes	56707
SRX4051363	mm10	Histone	H3K27AC	Liver	Hepatocytes	34374
SRX5806022	hg38	Histone	H3K27AC	Neural	Cerebellum	61308
SRX545938	mm10	Histone	H3K27AC	Neural	Cerebellum	45569
SRX4668969	hg38	Histone	H3K27AC	Neural	Neural Stem Cells	50099
ERX190775	mm10	Histone	H3K27AC	Neural	Neural Stem Cells	31834
SRX2911564	hg38	Histone	H3K27AC	Neural	Neuroblastoma	47362
SRX2960255	mm10	Histone	H3K27AC	Neural	Neuroblastoma	50865
ERX2078878	hg38	Histone	H3K27AC	Pancreas	Pancreatic adenocarcinoma	31801
SRX8026858	mm10	Histone	H3K27AC	Pancreas	Pancreatic adenocarcinoma	50325
SRX2853313	hg38	Histone	H3K27AC	Pancreas	Pancreatic ductal adenocarcinoma	43849
SRX2853272	mm10	Histone	H3K27AC	Pancreas	Pancreatic ductal adenocarcinoma	57105
SRX1053363	hg38	Histone	H3K27AC	Pluripotent stem cell	ES cells	37006
ERX2604632	mm10	Histone	H3K27AC	Pluripotent stem cell	ES cells	61751
SRX5195514	hg38	Histone	H3K27AC	Pluripotent stem cell	iPS cells	56977
SRX4397593	mm10	Histone	H3K27AC	Pluripotent stem cell	iPS cells	41176
SRX8406336	hg38	Histone	H3K27AC	Prostate	Prostate	61086
SRX373259	mm10	Histone	H3K27AC	Prostate	Prostate	36023
SRX212464	hg38	Histone	H3K4ME1	Blood	CD4+ T cells	50144
SRX2647485	mm10	Histone	H3K4ME1	Blood	CD4+ T cells	60397
SRX1089811	hg38	Histone	H3K4ME1	Blood	Hematopoietic Stem Cells	45145
SRX540683	mm10	Histone	H3K4ME1	Blood	Hematopoietic Stem Cells	59082
SRX3586322	hg38	Histone	H3K4ME1	Blood	Macrophages	25627
SRX150846	mm10	Histone	H3K4ME1	Blood	Macrophages	61569
SRX2004213	hg38	Histone	H3K4ME1	Blood	Monocytes	58115
SRX4018265	mm10	Histone	H3K4ME1	Blood	Monocytes	53118
SRX5391697	hg38	Histone	H3K4ME1	Blood	Neutrophils	48826
SRX1993713	mm10	Histone	H3K4ME1	Blood	Neutrophils	28027
SRX2869674	hg38	Histone	H3K4ME1	Liver	Hepatocytes	62054
SRX4051359	mm10	Histone	H3K4ME1	Liver	Hepatocytes	61943
SRX2671783	hg38	Histone	H3K4ME1	Pluripotent stem cell	iPS cells	28110
SRX3603023	mm10	Histone	H3K4ME1	Pluripotent stem cell	iPS cells	59491
SRX1261880	hg38	Histone	H3K4ME2	Blood	CD4+ T cells	26167
SRX1047899	mm10	Histone	H3K4ME2	Blood	CD4+ T cells	29763
SRX1136010	hg38	Histone	H3K4ME2	Blood	Granulocytes	41415
SRX203215	mm10	Histone	H3K4ME2	Blood	Granulocytes	53957
SRX2380906	hg38	Histone	H3K4ME2	Blood	Hematopoietic Stem Cells	35234
SRX658408	mm10	Histone	H3K4ME2	Blood	Hematopoietic Stem Cells	31010
SRX3734315	hg38	Histone	H3K4ME2	Breast	Mammary glands	46157
SRX031073	mm10	Histone	H3K4ME2	Breast	Mammary glands	27716
SRX2166923	hg38	Histone	H3K4ME2	Neural	Retina	44729
SRX2172780	mm10	Histone	H3K4ME2	Neural	Retina	53966
SRX2263931	hg38	Histone	H3K4ME2	Pluripotent stem cell	iPS cells	44446
SRX127401	mm10	Histone	H3K4ME2	Pluripotent stem cell	iPS cells	62478
SRX976243	hg38	Histone	H3K4ME3	Blood	B cells	33353
SRX668844	mm10	Histone	H3K4ME3	Blood	B cells	37733
SRX8167521	hg38	Histone	H3K4ME3	Blood	CD4 CD8 double positive cells	27066
SRX099394	mm10	Histone	H3K4ME3	Blood	CD4 CD8 double positive cells	30239
SRX666444	hg38	Histone	H3K4ME3	Blood	CD4+ T cells	43533
SRX6927317	mm10	Histone	H3K4ME3	Blood	CD4+ T cells	45422
SRX1142289	hg38	Histone	H3K4ME3	Blood	CD8+ T cells	33924
SRX4510526	mm10	Histone	H3K4ME3	Blood	CD8+ T cells	33434
SRX1614816	hg38	Histone	H3K4ME3	Blood	Dendritic Cells	41685
SRX032970	mm10	Histone	H3K4ME3	Blood	Dendritic Cells	33198
SRX1089813	hg38	Histone	H3K4ME3	Blood	Hematopoietic Stem Cells	32658
SRX084826	mm10	Histone	H3K4ME3	Blood	Hematopoietic Stem Cells	30775
SRX2770848	hg38	Histone	H3K4ME3	Blood	Macrophages	60637
SRX218753	mm10	Histone	H3K4ME3	Blood	Macrophages	44490
SRX5310593	hg38	Histone	H3K4ME3	Blood	Mast Cells	29640
SRX1456424	mm10	Histone	H3K4ME3	Blood	Mast Cells	31861
SRX735284	hg38	Histone	H3K4ME3	Blood	Th1 Cells	30342
SRX100605	mm10	Histone	H3K4ME3	Blood	Th1 Cells	59023
SRX735286	hg38	Histone	H3K4ME3	Blood	Th2 Cells	30219
SRX5688464	mm10	Histone	H3K4ME3	Blood	Th2 Cells	25577
SRX1046559	hg38	Histone	H3K4ME3	Blood	Thymus	25389
SRX389598	mm10	Histone	H3K4ME3	Blood	Thymus	31592
SRX2109217	hg38	Histone	H3K4ME3	Breast	Mammary epithelial cells	42528
SRX1672034	mm10	Histone	H3K4ME3	Breast	Mammary epithelial cells	26583
SRX3734312	hg38	Histone	H3K4ME3	Breast	Mammary glands	27882
SRX1425165	mm10	Histone	H3K4ME3	Breast	Mammary glands	34958
SRX2869675	hg38	Histone	H3K4ME3	Liver	Hepatocytes	43976
SRX3942948	mm10	Histone	H3K4ME3	Liver	Hepatocytes	62323
SRX974431	hg38	Histone	H3K4ME3	Liver	Liver	58662
SRX1479650	mm10	Histone	H3K4ME3	Liver	Liver	57136
SRX974427	hg38	Histone	H3K4ME3	Lung	Lung	51364
SRX062974	mm10	Histone	H3K4ME3	Lung	Lung	33904
SRX7805779	hg38	Histone	H3K4ME3	Neural	Neural Stem Cells	25566
SRX3029208	mm10	Histone	H3K4ME3	Neural	Neural Stem Cells	31249
SRX2383623	hg38	Histone	H3K4ME3	Pluripotent stem cell	ES cells	51431
SRX203377	mm10	Histone	H3K4ME3	Pluripotent stem cell	ES cells	62336
SRX2671805	hg38	Histone	H3K4ME3	Pluripotent stem cell	iPS cells	40535
SRX3603062	mm10	Histone	H3K4ME3	Pluripotent stem cell	iPS cells	59650
SRX481465	hg38	Histone	H3K4ME3	Prostate	Prostate	35999
SRX283742	mm10	Histone	H3K4ME3	Prostate	Prostate	32213
SRX5763011	hg38	Histone	H3K9ME3	Pluripotent stem cell	ES cells	26527
DRX013342	mm10	Histone	H3K9ME3	Pluripotent stem cell	ES cells	58019
SRX3095325	hg38	Histone	H3K9ME3	Pluripotent stem cell	iPS cells	31184
SRX2172874	mm10	Histone	H3K9ME3	Pluripotent stem cell	iPS cells	42502
SRX4284008	hg38	TFs and others	CTCF	Blood	B cells	49829
SRX3753608	mm10	TFs and others	CTCF	Blood	B cells	60907
SRX5299873	hg38	TFs and others	CTCF	Blood	Erythroid Cells	56097
SRX2741819	mm10	TFs and others	CTCF	Blood	Erythroid Cells	35385
SRX188963	hg38	TFs and others	CTCF	Kidney	Kidney	36808
SRX062960	mm10	TFs and others	CTCF	Kidney	Kidney	47813
SRX188959	hg38	TFs and others	CTCF	Lung	Lung	28913
SRX062972	mm10	TFs and others	CTCF	Lung	Lung	31563
SRX2166891	hg38	TFs and others	CTCF	Neural	Retina	28913
SRX2172628	mm10	TFs and others	CTCF	Neural	Retina	25924
SRX4377124	hg38	TFs and others	CTCF	Pluripotent stem cell	ES cells	45703
SRX1704883	mm10	TFs and others	CTCF	Pluripotent stem cell	ES cells	61570
SRX4001763	hg38	TFs and others	RAD21	Blood	Macrophages	29709
SRX3581756	mm10	TFs and others	RAD21	Blood	Macrophages	46043
SRX5574369	hg38	TFs and others	SPI1	Blood	Dendritic Cells	44698
SRX5095872	mm10	TFs and others	SPI1	Blood	Dendritic Cells	44042
SRX1089832	hg38	TFs and others	SPI1	Blood	Hematopoietic Stem Cells	29105
SRX2341954	mm10	TFs and others	SPI1	Blood	Hematopoietic Stem Cells	58809
SRX093189	hg38	TFs and others	SPI1	Blood	Macrophages	56245
SRX197253	mm10	TFs and others	SPI1	Blood	Macrophages	62298
SRX5574348	hg38	TFs and others	SPI1	Blood	Neutrophils	39479
SRX3723675	mm10	TFs and others	SPI1	Blood	Neutrophils	56599
SRX1799591	hg38	TFs and others	TBX21	Blood	Th1 Cells	54426
SRX107338	mm10	TFs and others	TBX21	Blood	Th1 Cells	28040

## Sheet: Histones - counts
	Histone mark (All cell types AND threshold=05)	no_experiments				no_peaks_total				total_assemblies	total_experiments	total_peaks
		ce11	dm6	hg38	mm10	ce11	dm6	hg38	mm10
	H3K27ac	18	185	5409	3771	61924	893121	140557641	75103898	4	9387	216616588
	H3K4me3	90	215	3318	3322	417532	1240894	68821564	76658049	4	6949	147138043
	H3K4me1	22	74	1497	1797	13730	567575	42879408	32712644	4	3394	76173361
	H3K4me2	6	40	483	679	36404	344267	16974751	20713556	4	1212	38068982
	H3K27me3	38	252	2035	3036	58609	581538	9613987	9741229	4	5365	19995367
	H3K9ac	1	33	350	451	1621	189443	6364344	7299205	4	839	13854617
	H3K9me3	108	122	770	840	143052	866802	4639434	3824549	4	1844	9473841
	H3K36me3	69	59	491	705	359099	433095	1840399	2605565	4	1328	5238162
	H3	31	57	200	328	55110	216205	1805781	796130	4	620	2873230
	H3ac	4	25	78	28	2041	172589	1263838	481569	4	139	1920041
	H3K18ac	2	11	78	33	1625	21375	1450493	402208	4	128	1875705
	H3K79me2	3	4	256	119	9903	37483	1401404	405450	4	386	1854244
	H3K9me2	27	42	121	300	200635	182250	380387	263390	4	494	1026666
	H4K16ac	9	73	61	62	10627	327190	278978	246131	4	209	862930
	H4K8ac	4	2	26	58	3237	3469	362133	467158	4	94	836001
	H3K14ac	2	9	22	14	1494	78438	186559	154564	4	51	421059
	H3K79me3	5	7	38	38	22211	55409	176699	165369	4	92	419692
	H4	6	10	30	4	17101	22054	193665	94904	4	54	327728
	H3K36me2	4	14	75	75	11250	66117	143028	93425	4	172	313824
	H3K27me2	6	12	15	57	2600	57279	8585	147543	4	94	216011
	H4K20me1	30	12	65	23	42305	48716	56711	47326	4	134	195062
	H3K27me1	10	6	19	38	6035	8770	30908	74058	4	77	119775
	H3K9me1	3	4	24	13	2393	20588	18650	29058	4	48	70693
	H3K79me1	2	3	4	17	574	12058	374	17452	4	30	30462
	H3K36me1	6	4	2	2	5095	5884	1040	5493	4	18	17516
	H3K9K14ac	0	4	85	132	0	24294	1695873	2445641	3	224	4165811
	H4ac	0	6	10	78	0	66479	89922	1455701	3	97	1612105
	H4K5ac	0	4	19	55	0	7878	172408	643051	3	81	823340
	H3.3	0	1	59	125	0	5894	415497	370677	3	188	792071
	H3K36ac	2	0	7	3	16707	0	159746	28677	3	15	205133
	H2Bub	0	13	24	38	0	64084	17429	60255	3	78	141771
	H3K23ac	1	0	25	2	681	0	85416	4357	3	31	90457
	H2AK5ac	3	0	3	6	23537	0	14724	24350	3	15	62614
	H2B	0	1	6	6	0	3113	6611	1884	3	16	11611
	H2A.Z	0	0	104	133	0	0	1843291	1632485	2	239	3475778
	H3K122ac	0	0	51	20	0	0	993187	334823	2	73	1328012
	H4K12ac	0	0	36	41	0	0	768673	250950	2	79	1019625
	H3K56ac	0	0	14	16	0	0	433278	161010	2	32	594290
	H2AK119Ub	0	0	70	212	0	0	90731	457976	2	284	548709
	H2A.XS139ph	0	0	87	66	0	0	312575	103795	2	155	416372
	H2BK5ac	0	0	8	10	0	0	169767	243962	2	20	413731
	H2A.Zac	0	0	10	3	0	0	246139	117440	2	15	363581
	macroH2A1	0	0	21	14	0	0	62286	282239	2	37	344527
	H3K4ac	0	0	25	5	0	0	245324	55266	2	32	300592
	H2BK20ac	0	0	1	9	0	0	32346	124056	2	12	156404
	macroH2A1.2	0	0	6	2	0	0	6511	142449	2	10	148962
	H2BK120ac	0	0	5	5	0	0	70674	70782	2	12	141458
	H4K20me3	0	0	43	18	0	0	77758	36478	2	63	114238
	H3K18cr	0	0	6	8	0	0	45889	56731	2	16	102622
	H3R26cit	0	0	8	1	0	0	97308	94	2	11	97404
	Pan lysine crotonylation	0	0	1	2	0	0	15238	77913	2	5	93153
	H2A.X	0	0	19	51	0	0	34418	51313	2	72	85733
	H3.3 K27M mutant	0	0	20	6	0	0	71362	11243	2	28	82607
	H4K91ac	0	0	4	5	0	0	30427	47571	2	11	78000
	H2AK9ac	0	0	4	2	0	0	10278	59205	2	8	69485
	H3K9acS10ph	4	0	0	22	4090	0	0	56213	2	28	60305
	macroH2A2	0	0	2	10	0	0	18494	36898	2	14	55394
	H3.1	0	0	3	24	0	0	2883	51681	2	29	54566
	H2Aub	0	0	2	21	0	0	28056	16191	2	25	44249
	H1	0	15	0	4	0	30201	0	1690	2	21	31893
	H4K20me2	0	0	8	2	0	0	25691	4527	2	12	30220
	H3S10ph	2	0	0	30	2857	0	0	16937	2	34	19796
	H3R2me2	0	0	10	1	0	0	12902	4847	2	13	17751
	H3K14me3	0	0	2	1	0	0	2705	7105	2	5	9812
	H3R17me2	0	0	3	2	0	0	2392	6042	2	7	8436
	H2BK120ub	0	0	2	20	0	0	193	6067	2	24	6262
	Pan lysine acetylation	0	0	1	2	0	0	2820	2095	2	5	4917
	H1t	0	0	2	3	0	0	1565	457	2	7	2024
	H2A.ZK4K7K11ac	0	0	28	0	0	0	696375	0	1	29	696376
	H4K5K8ac	0	0	10	0	0	0	291317	0	1	11	291318
	H2A.V	0	60	0	0	0	273264	0	0	1	61	273265
	H3K64ac	0	0	0	4	0	0	0	159984	1	5	159985
	CENPA	0	0	17	0	0	0	157518	0	1	18	157519
	H4K5K8K12K16ac	0	0	8	0	0	0	134173	0	1	9	134174
	H2BK15ac	0	0	11	0	0	0	128858	0	1	12	128859
	htz-1	9	0	0	0	69958	0	0	0	1	10	69959
	H3K4ox	0	0	2	0	0	0	64360	0	1	3	64361
	H3K5ac	0	0	2	0	0	0	60235	0	1	3	60236
	H1.0	0	0	1	0	0	0	47849	0	1	2	47850
	H3.Y	0	0	4	0	0	0	42698	0	1	5	42699
	H4K4me3	0	0	2	0	0	0	42428	0	1	3	42429
	H3K9Kac	0	0	4	0	0	0	34905	0	1	5	34906
	H1.2	0	0	11	0	0	0	31523	0	1	12	31524
	H2AK118ub	0	5	0	0	0	31304	0	0	1	6	31305
	H4K8bu	0	0	0	2	0	0	0	29405	1	3	29406
	H3K34me3	0	0	0	2	0	0	0	24961	1	3	24962
	H3K18la	0	0	0	2	0	0	0	22516	1	3	22517
	H4K5K8K16ac	0	0	1	0	0	0	21295	0	1	2	21296
	H3K9bhb	0	0	0	3	0	0	0	19829	1	4	19830
	H3K4me	0	0	1	0	0	0	19424	0	1	2	19425
	H1.5	0	0	6	0	0	0	18307	0	1	7	18308
	H2BK120ub1	0	0	15	0	0	0	17499	0	1	16	17500
	H3Kac	0	0	0	1	0	0	0	17416	1	2	17417
	H4tetraac	2	0	0	0	16946	0	0	0	1	3	16947
	H4K5bu	0	0	0	2	0	0	0	15767	1	3	15768
	H3R2me2K4me3	0	0	0	1	0	0	0	15489	1	2	15490
	H2BK12ac	0	0	0	2	0	0	0	14896	1	3	14897
	H3S28ph	0	0	0	8	0	0	0	14062	1	9	14063
	H3K27cr	0	0	4	0	0	0	13315	0	1	5	13316
	H3S31ph	0	0	0	16	0	0	0	10910	1	17	10911
	H2A.VS137ph	0	8	0	0	0	10602	0	0	1	9	10603
	H3K23me3	20	0	0	0	10449	0	0	0	1	21	10450
	H3K9K14K18K23K27ac	0	0	2	0	0	0	10100	0	1	3	10101
	H2AK119ub1	0	66	0	0	0	9434	0	0	1	67	9435
	H2AK120Ub	0	0	32	0	0	0	9244	0	1	33	9245
	H3K26me3	0	0	0	1	0	0	0	6881	1	2	6882
	H3K27me3S28ph	0	0	0	2	0	0	0	6322	1	3	6323
	H2BS112GlcNAc	0	0	5	0	0	0	5817	0	1	6	5818
	H3S57ph	0	0	4	0	0	0	5506	0	1	5	5507
	H3.3B	0	0	5	0	0	0	4758	0	1	6	4759
	H3K79suc	0	0	2	0	0	0	4236	0	1	3	4237
	H3K14pr	0	0	0	4	0	0	0	3983	1	5	3984
	H1.4K34ac	0	0	1	0	0	0	3816	0	1	2	3817
	H3K12ac	0	3	0	0	0	3441	0	0	1	4	3442
	H3K4bhb	0	0	0	2	0	0	0	3089	1	3	3090
	H3R8me2	0	0	4	0	0	0	2888	0	1	5	2889
	H2Bac	0	0	0	11	0	0	0	2830	1	12	2831
	H1B	0	0	2	0	0	0	2744	0	1	3	2745
	H4R3me2s	0	0	0	8	0	0	0	2635	1	9	2636
	H3.6	0	0	4	0	0	0	2445	0	1	5	2446
	H2BP1me1	0	0	1	0	0	0	2383	0	1	2	2384
	H2A.Z.1	0	0	2	0	0	0	2352	0	1	3	2353
	H3.7	0	0	4	0	0	0	2291	0	1	5	2292
	H2A	0	0	0	10	0	0	0	2231	1	11	2232
	H3K14bu	0	0	0	4	0	0	0	2231	1	5	2232
	Hand1	0	0	0	1	0	0	0	2221	1	2	2222
	H3T45ph	0	0	2	0	0	0	1906	0	1	3	1907
	H3K23me1	3	0	0	0	1904	0	0	0	1	4	1905
	H3K23me2	3	0	0	0	1901	0	0	0	1	4	1902
	H3S10phK14ac	0	0	0	2	0	0	0	1883	1	3	1884
	H4R3me2	0	0	6	0	0	0	1735	0	1	7	1736
	hcp-4	1	0	0	0	1677	0	0	0	1	2	1678
	H3mm16	0	0	0	2	0	0	0	1658	1	3	1659
	H2	0	0	1	0	0	0	1645	0	1	2	1646
	H3mm12	0	0	0	2	0	0	0	1606	1	3	1607
	H4K8bhb	0	0	0	2	0	0	0	1394	1	3	1395
	H3T11ph	0	0	2	0	0	0	1350	0	1	3	1351
	TH2BS11ph	0	0	0	4	0	0	0	1335	1	5	1336
	H3.3S31ph	0	0	0	3	0	0	0	1291	1	4	1292
	H1.X	0	0	1	0	0	0	1211	0	1	2	1212
	H3.2	0	0	0	3	0	0	0	1186	1	4	1187
	H3.5	0	0	2	0	0	0	1169	0	1	3	1170
	Hoxa9	0	0	0	2	0	0	0	1071	1	3	1072
	H2AK5sc	0	0	0	2	0	0	0	1038	1	3	1039
	H3K122sc	0	0	1	0	0	0	925	0	1	2	926
	H1.4	0	0	1	0	0	0	903	0	1	2	904
	Hmga2	0	0	0	3	0	0	0	878	1	4	879
	H2A.Bbd1	0	0	0	2	0	0	0	843	1	3	844
	WAPL	0	0	2	0	0	0	816	0	1	3	817
	H2A.B	0	0	0	1	0	0	0	769	1	2	770
	H2A.Z.2	0	0	2	0	0	0	755	0	1	3	756
	H3mm11	0	0	0	2	0	0	0	730	1	3	731
	H3K9S10me3	0	0	0	1	0	0	0	727	1	2	728
	macroH2A	0	0	0	1	0	0	0	726	1	2	727
	H3mm13	0	0	0	2	0	0	0	723	1	3	724
	H2BK119ub	0	0	0	2	0	0	0	703	1	3	704
	H2AS40GlcNAc	0	0	0	4	0	0	0	691	1	5	692
	H2AT120ph	0	0	2	0	0	0	674	0	1	3	675
	H3mmT	0	0	0	2	0	0	0	660	1	3	661
	H4K12me1	0	0	2	0	0	0	608	0	1	3	609
	H3T6ph	0	0	1	0	0	0	578	0	1	2	579
	H3mm7	0	0	0	2	0	0	0	428	1	3	429
	H1K85ac	0	0	1	0	0	0	408	0	1	2	409
	H2S112GlcNAc	0	0	0	1	0	0	0	386	1	2	387
	hcp-3	1	0	0	0	385	0	0	0	1	2	386
	H3K79homocysteine	0	0	0	1	0	0	0	268	1	2	269
	H3K20me1	0	0	0	2	0	0	0	250	1	3	251

## Sheet: Histones - avail. gen. ass.
	Adipocyte	Adult	Blood	Bone	Breast	Cardiovascular	Cell line	Digestive tract	Embryo	Embryonic fibroblast	Epidermis	Gonad	Kidney	Larvae	Liver	Lung	Muscle	Neural	No description	Others	Pancreas	Placenta	Pluripotent stem cell	Prostate	Pupae	Spleen	Unclassified	Uterus
H3K27me3	2	2	2	2	2	2	1	2	4	1	2	2	2	2	2	2	2	2		2	2	2	2	1	1	1	3	2
H3K4me1	2	2	2	2	2	2	1	2	3	1	2	2	2	2	2	2	2	2		2	2	2	2	2	1	1	3	2
H3K4me3	2	2	2	2	2	2	1	2	3	1	2	2	2	2	2	2	2	2		2	2	2	2	2	1	1	3	2
H3K27ac	2	2	2	2	2	2	1	2	3	1	2	2	2	2	2	2	2	2		2	2	2	2	2	1	1	3	2
H3K36me3	2	2	2	2	2	2	1	2	3	1	1	2	2	2	2	2	2	2		2	2	1	2	1		1	3	1
H3K9me3	1	2	2	2	1	1	1	2	3	1	2	2	1	2	2	2	2	2		2	2	1	2	1	1		3	2
H3K4me2	2	2	2	2	2	2	1	2	3	1	2	2	1	1	2	2	2	2		2	1	1	2	1			2	1
H3K9ac		1	2	2	1	2		2	2	1	2	2	2	2	2	2	2	2		2	2	1	2		1	1	1	1
H3	1	2	2	2	1	1	1	2	3	1	2	1	1	2	2	1	2	2				1	2	1			2	1
H3K9me2	1	2	2	1	2	2	1	2	3	1		1	1	2	1	2		2			1		1	1			1	1
H3K79me2		1	2	1	1	2		2	3	1	2		1	1	2	2	2	2			1		2	1			1	1
H2A.Z			2	1	1	2		2		1	2	2			2	1	2	2		1	1	1	2	1				1
H3K36me2	1	1	2	1	1		1		2	1		1	1	1		1	2	2		1	1		2	1			2	1
H4K20me1		1	2	2	1	1	1		2	1	1			2	1	1	1	2		1		1	1	1			1	1
H4K16ac	1	1	2	1			1	1	3	1	1	2	1	2		1	2	1					1				1	1
H3K79me3		2	2					1	2	1	1	1	1	2		1	1	1		1			2				2	1
H2AK119Ub			2	1	1			1	1	1	1	1	1			1		2		1	2	1	2	1			1
H3K18ac		1	2	1	1			1	1	1	1		1	2		1	1						2	1			1
H3K9K14ac		1	2		1	1				1						1	1	2		1			2	1			2	1
H3K27me2		1	1		1		1	2	2					1		1	1	2			1		2				1
H3K9me1			2	1		1		1	2		1			2	1	1	1						2				1
H4K20me3			2	1	1					1	1	2				1		2		1			1	1			1	1
H3K27me1		1	2				1	2	1			1		2							1		2				2
H3ac			2		1	2	1		2	1			1										2	1			1	1
H3K14ac		1	1	1	1		1		1		1	1	1			1				1			1	1			1
H2A.XS139ph			2	1	1			1	1	1		1	1			1				2			1					1
H3.3			1	1	1		1	1		1		1	1			1	1	2					1					1
H4			1	2			1		2		1		1	2		1				1							1
H4K5ac			1	1					1			1	1		1	1		1		1			1	1			1
H4ac			2			1	1			1		1	1				1			1			1	1				1
H4K12ac			1		1				1		1	1	1			1	1	1									2
H2Bub		1			1		1	1	1	1				1			1	1					2
H4K8ac		1	1		2				2		1	1				1							1				1
H3K56ac	1		2	1							1										1		1				1
macroH2A1			1							1	1				1	1	1	1										1
H3K79me1			1						2		1	1		1									1				1
H3K122ac			2		1										1	1		1					1
H3K36me1		1	1						2					2													1
H3K36ac			1											1	2		1										1
H1		1					1		1					1	1			1
H2Aub			1									1							1	1			1	1
H3K23ac			1		1				1		1					1											1
H3K4ac			1		1							1				1				1							1
H2AK5ac		1	1								1				1	1											1
H2A.X			1	1						1												1	1					1
H3S10ph		1	1							1							1						1
H4K20me2			1	1							1																1	1
H3.1					1												1	1					1					1
macroH2A2										1	2				1								1
H2B								1	1						1								2
H2AK120Ub			1	1	1			1															1
H2BK120ac			1	1							1	1															1
H2BK120ub			1	1																	1		1					1
H2A.V		1					1		1					1													1
H2BK20ac			2						1									1					1
H2BK5ac			1													1	1					1					1
CENPA			1																	1				1				1
H1t					1			1				1											1
H2A.Zac			1															1					1					1
H3K18cr			1					2															1
H3.3 K27M mutant								1										1									2
H3R17me2					1					1						1
H4K91ac			1								1																1
H3K14me3											1		1										1
H4R3me2			1													1				1
H3S28ph			1			1				1
H3R2me2			1	1																			1
H4K5K8K12K16ac			1								1																1
H3K9acS10ph									1	1				1
H3K9bhb			1												1
macroH2A1.2			1														1
htz-1									1					1
H2AK118ub		1												1
Pan lysine crotonylation												1				1
Pan lysine acetylation												1				1
H2A.ZK4K7K11ac					1																			1
H4K5K8ac			1													1
H3.2																	1						1
Hmga2										1																	1
H3R26cit					1																		1
H1.2			1		1
H3R8me2																1		1
H2AS40GlcNAc																						1	1
H2A																						1	1
H1B																1							1
H2AK9ac			1													1
H2A.VS137ph		1					1
H2BS112GlcNAc	1																											1
H3.3B												1											1
H2BK15ac																								1			1
H3K4bhb															1
H4K4me3					1
H1.4					1
H4K5bu												1
H1.4K34ac					1
H3K122sc															1
H4K5K8K16ac			1
H3K12ac							1
H1.X					1
H1.5			1
H2BP1me1					1
H1K85ac								1
H4K12me1																								1
H3K14bu															1
H2			1
H3mmT																	1
H3mm7																	1
H4K8bhb															1
H4K8bu												1
H3mm13																	1
H3.Y																												1
H2Bac																		1
H1.0											1
macroH2A																							1
hcp-4									1
hcp-3									1
WAPL																							1
TH2BS11ph												1
H3.3S31ph																							1
H3.5																												1
Hoxa9			1
H3.6																												1
Hand1																							1
H4tetraac														1
H3.7																												1
H4R3me2s			1
H3mm16																	1
H3mm12																	1
H3K4me																		1
H3K34me3			1
H3K9S10me3																		1
H3K9Kac			1
H2A.Z.2																												1
H3K9K14K18K23K27ac			1
H3K79suc																		1
H2BK120ub1					1
H3K27me3S28ph																		1
H3K79homocysteine																		1
H2BK12ac			1
H3K64ac																							1
H3K5ac			1
H2AK119ub1																											1
H3K4ox					1
H2BK119ub																							1
H2AK5sc															1
H2AT120ph				1
H2A.Z.1																												1
H3K27cr								1
H3mm11																	1
H3S10phK14ac			1
H3K14pr															1
H3T6ph																								1
H3T45ph					1
H3T11ph																								1
H3S57ph				1
H3S31ph			1
H3K18la			1
H2A.B																							1
H3K26me3				1
H3K20me1																		1
H3R2me2K4me3			1
H3K23me1		1
H3K23me2		1
H3K23me3		1
H3Kac			1
H2A.Bbd1												1
H2S112GlcNAc																							1

## Sheet: Histones - peaks by cell class 
	Adipocyte		Adult		Blood		Bone		Breast		Cardiovascular		Cell line	Digestive tract		Embryo				Embryonic fibroblast	Epidermis		Gonad		Kidney		Larvae		Liver		Lung		Muscle		Neural		No description	Others		Pancreas		Placenta		Pluripotent stem cell		Prostate		Pupae	Spleen
	hg38	mm10	ce11	dm6	hg38	mm10	hg38	mm10	hg38	mm10	hg38	mm10	dm6	hg38	mm10	ce11	dm6	hg38	mm10	mm10	hg38	mm10	hg38	mm10	hg38	mm10	ce11	dm6	hg38	mm10	hg38	mm10	hg38	mm10	hg38	mm10	mm10	hg38	mm10	hg38	mm10	hg38	mm10	hg38	mm10	hg38	mm10	dm6	mm10
CENPA	0	0	0	0	22380	0	0	0	0	0	0	0	0	0	0	0	0	0	0	0	0	0	0	0	0	0	0	0	0	0	0	0	0	0	0	0	0	10757	0	0	0	0	0	0	0	3846	0	0	0
H1	0	0	0	4785	0	0	0	0	0	0	0	0	11788	0	0	0	9693	0	0	0	0	0	0	0	0	0	0	3935	0	763	0	0	0	0	0	927	0	0	0	0	0	0	0	0	0	0	0	0	0
H1.0	0	0	0	0	0	0	0	0	0	0	0	0	0	0	0	0	0	0	0	0	47849	0	0	0	0	0	0	0	0	0	0	0	0	0	0	0	0	0	0	0	0	0	0	0	0	0	0	0	0
H1.2	0	0	0	0	20647	0	0	0	10876	0	0	0	0	0	0	0	0	0	0	0	0	0	0	0	0	0	0	0	0	0	0	0	0	0	0	0	0	0	0	0	0	0	0	0	0	0	0	0	0
H1.4	0	0	0	0	0	0	0	0	903	0	0	0	0	0	0	0	0	0	0	0	0	0	0	0	0	0	0	0	0	0	0	0	0	0	0	0	0	0	0	0	0	0	0	0	0	0	0	0	0
H1.4K34ac	0	0	0	0	0	0	0	0	3816	0	0	0	0	0	0	0	0	0	0	0	0	0	0	0	0	0	0	0	0	0	0	0	0	0	0	0	0	0	0	0	0	0	0	0	0	0	0	0	0
H1.5	0	0	0	0	18307	0	0	0	0	0	0	0	0	0	0	0	0	0	0	0	0	0	0	0	0	0	0	0	0	0	0	0	0	0	0	0	0	0	0	0	0	0	0	0	0	0	0	0	0
H1.X	0	0	0	0	0	0	0	0	1211	0	0	0	0	0	0	0	0	0	0	0	0	0	0	0	0	0	0	0	0	0	0	0	0	0	0	0	0	0	0	0	0	0	0	0	0	0	0	0	0
H1B	0	0	0	0	0	0	0	0	0	0	0	0	0	0	0	0	0	0	0	0	0	0	0	0	0	0	0	0	0	0	1458	0	0	0	0	0	0	0	0	0	0	0	0	1286	0	0	0	0	0
H1K85ac	0	0	0	0	0	0	0	0	0	0	0	0	0	408	0	0	0	0	0	0	0	0	0	0	0	0	0	0	0	0	0	0	0	0	0	0	0	0	0	0	0	0	0	0	0	0	0	0	0
H1t	0	0	0	0	0	0	0	0	953	0	0	0	0	612	0	0	0	0	0	0	0	0	0	351	0	0	0	0	0	0	0	0	0	0	0	0	0	0	0	0	0	0	0	0	106	0	0	0	0
H2	0	0	0	0	1645	0	0	0	0	0	0	0	0	0	0	0	0	0	0	0	0	0	0	0	0	0	0	0	0	0	0	0	0	0	0	0	0	0	0	0	0	0	0	0	0	0	0	0	0
H2A	0	0	0	0	0	0	0	0	0	0	0	0	0	0	0	0	0	0	0	0	0	0	0	0	0	0	0	0	0	0	0	0	0	0	0	0	0	0	0	0	0	0	673	0	1558	0	0	0	0
H2A.B	0	0	0	0	0	0	0	0	0	0	0	0	0	0	0	0	0	0	0	0	0	0	0	0	0	0	0	0	0	0	0	0	0	0	0	0	0	0	0	0	0	0	0	0	769	0	0	0	0
H2A.Bbd1	0	0	0	0	0	0	0	0	0	0	0	0	0	0	0	0	0	0	0	0	0	0	0	843	0	0	0	0	0	0	0	0	0	0	0	0	0	0	0	0	0	0	0	0	0	0	0	0	0
H2A.V	0	0	0	24957	0	0	0	0	0	0	0	0	217098	0	0	0	13647	0	0	0	0	0	0	0	0	0	0	16877	0	0	0	0	0	0	0	0	0	0	0	0	0	0	0	0	0	0	0	0	0
H2A.VS137ph	0	0	0	5094	0	0	0	0	0	0	0	0	5508	0	0	0	0	0	0	0	0	0	0	0	0	0	0	0	0	0	0	0	0	0	0	0	0	0	0	0	0	0	0	0	0	0	0	0	0
H2A.X	0	0	0	0	15784	0	1511	0	0	0	0	0	0	0	0	0	0	0	0	4085	0	0	0	0	0	0	0	0	0	0	0	0	0	0	0	0	0	0	0	0	0	0	1752	0	45476	0	0	0	0
H2A.XS139ph	0	0	0	0	45764	36973	18559	0	22240	0	0	0	0	13112	0	0	0	0	2050	43679	0	0	0	12422	0	2304	0	0	0	0	12620	0	0	0	0	0	0	3668	2217	0	0	0	0	0	4150	0	0	0	0
H2A.Z	0	0	0	0	541115	327625	102765	0	101527	0	66305	104560	0	25732	139586	0	0	0	0	79612	104968	5347	66	31408	0	0	0	0	16471	114697	345062	0	88519	45323	88430	424473	0	69294	0	0	433	0	4174	22940	355247	170188	0	0	0
H2A.Z.1	0	0	0	0	0	0	0	0	0	0	0	0	0	0	0	0	0	0	0	0	0	0	0	0	0	0	0	0	0	0	0	0	0	0	0	0	0	0	0	0	0	0	0	0	0	0	0	0	0
H2A.Z.2	0	0	0	0	0	0	0	0	0	0	0	0	0	0	0	0	0	0	0	0	0	0	0	0	0	0	0	0	0	0	0	0	0	0	0	0	0	0	0	0	0	0	0	0	0	0	0	0	0
H2A.ZK4K7K11ac	0	0	0	0	0	0	0	0	449884	0	0	0	0	0	0	0	0	0	0	0	0	0	0	0	0	0	0	0	0	0	0	0	0	0	0	0	0	0	0	0	0	0	0	0	0	246491	0	0	0
H2A.Zac	0	0	0	0	157765	0	0	0	0	0	0	0	0	0	0	0	0	0	0	0	0	0	0	0	0	0	0	0	0	0	0	0	0	0	0	100376	0	0	0	0	0	0	0	0	17064	0	0	0	0
H2AK118ub	0	0	0	29270	0	0	0	0	0	0	0	0	0	0	0	0	0	0	0	0	0	0	0	0	0	0	0	2034	0	0	0	0	0	0	0	0	0	0	0	0	0	0	0	0	0	0	0	0	0
H2AK119Ub	0	0	0	0	16305	24374	1645	0	7368	0	0	0	0	0	636	0	0	0	363	4322	0	755	0	413	12721	0	0	0	0	0	345	0	0	0	6668	228	0	0	14424	3326	1244	0	962	12088	355894	30265	0	0	0
H2AK119ub1	0	0	0	0	0	0	0	0	0	0	0	0	0	0	0	0	0	0	0	0	0	0	0	0	0	0	0	0	0	0	0	0	0	0	0	0	0	0	0	0	0	0	0	0	0	0	0	0	0
H2AK120Ub	0	0	0	0	2735	0	1120	0	4258	0	0	0	0	683	0	0	0	0	0	0	0	0	0	0	0	0	0	0	0	0	0	0	0	0	0	0	0	0	0	0	0	0	0	448	0	0	0	0	0
H2AK5ac	0	0	23537	0	0	3141	0	0	0	0	0	0	0	0	0	0	0	0	0	0	387	0	0	0	0	0	0	0	0	717	0	20492	0	0	0	0	0	0	0	0	0	0	0	0	0	0	0	0	0
H2AK5sc	0	0	0	0	0	0	0	0	0	0	0	0	0	0	0	0	0	0	0	0	0	0	0	0	0	0	0	0	0	1038	0	0	0	0	0	0	0	0	0	0	0	0	0	0	0	0	0	0	0
H2AK9ac	0	0	0	0	0	59205	0	0	0	0	0	0	0	0	0	0	0	0	0	0	0	0	0	0	0	0	0	0	0	0	10278	0	0	0	0	0	0	0	0	0	0	0	0	0	0	0	0	0	0
H2AS40GlcNAc	0	0	0	0	0	0	0	0	0	0	0	0	0	0	0	0	0	0	0	0	0	0	0	0	0	0	0	0	0	0	0	0	0	0	0	0	0	0	0	0	0	0	177	0	514	0	0	0	0
H2AT120ph	0	0	0	0	0	0	674	0	0	0	0	0	0	0	0	0	0	0	0	0	0	0	0	0	0	0	0	0	0	0	0	0	0	0	0	0	0	0	0	0	0	0	0	0	0	0	0	0	0
H2Aub	0	0	0	0	0	155	0	0	0	0	0	0	0	0	0	0	0	0	0	0	0	0	0	2219	0	0	0	0	0	0	0	0	0	0	0	0	9354	0	853	0	0	0	0	0	3610	28056	0	0	0
H2B	0	0	0	0	0	0	0	0	0	0	0	0	0	3227	0	0	3113	0	0	0	0	0	0	0	0	0	0	0	0	1038	0	0	0	0	0	0	0	0	0	0	0	0	0	3384	846	0	0	0	0
H2BK119ub	0	0	0	0	0	0	0	0	0	0	0	0	0	0	0	0	0	0	0	0	0	0	0	0	0	0	0	0	0	0	0	0	0	0	0	0	0	0	0	0	0	0	0	0	703	0	0	0	0
H2BK120ac	0	0	0	0	0	59677	26291	0	0	0	0	0	0	0	0	0	0	0	0	0	2222	0	0	11105	0	0	0	0	0	0	0	0	0	0	0	0	0	0	0	0	0	0	0	0	0	0	0	0	0
H2BK120ub	0	0	0	0	0	2497	84	0	0	0	0	0	0	0	0	0	0	0	0	0	0	0	0	0	0	0	0	0	0	0	0	0	0	0	0	0	0	0	0	0	317	0	0	0	3253	0	0	0	0
H2BK120ub1	0	0	0	0	0	0	0	0	17499	0	0	0	0	0	0	0	0	0	0	0	0	0	0	0	0	0	0	0	0	0	0	0	0	0	0	0	0	0	0	0	0	0	0	0	0	0	0	0	0
H2BK12ac	0	0	0	0	0	14896	0	0	0	0	0	0	0	0	0	0	0	0	0	0	0	0	0	0	0	0	0	0	0	0	0	0	0	0	0	0	0	0	0	0	0	0	0	0	0	0	0	0	0
H2BK15ac	0	0	0	0	0	0	0	0	0	0	0	0	0	0	0	0	0	0	0	0	0	0	0	0	0	0	0	0	0	0	0	0	0	0	0	0	0	0	0	0	0	0	0	0	0	126738	0	0	0
H2BK20ac	0	0	0	0	32346	3992	0	0	0	0	0	0	0	0	0	0	0	0	58723	0	0	0	0	0	0	0	0	0	0	0	0	0	0	0	0	58376	0	0	0	0	0	0	0	0	2965	0	0	0	0
H2BK5ac	0	0	0	0	0	208744	0	0	0	0	0	0	0	0	0	0	0	0	0	0	0	0	0	0	0	0	0	0	0	0	33845	0	73031	0	0	0	0	0	0	0	0	0	35218	0	0	0	0	0	0
H2BP1me1	0	0	0	0	0	0	0	0	2383	0	0	0	0	0	0	0	0	0	0	0	0	0	0	0	0	0	0	0	0	0	0	0	0	0	0	0	0	0	0	0	0	0	0	0	0	0	0	0	0
H2BS112GlcNAc	5394	0	0	0	0	0	0	0	0	0	0	0	0	0	0	0	0	0	0	0	0	0	0	0	0	0	0	0	0	0	0	0	0	0	0	0	0	0	0	0	0	0	0	0	0	0	0	0	0
H2Bac	0	0	0	0	0	0	0	0	0	0	0	0	0	0	0	0	0	0	0	0	0	0	0	0	0	0	0	0	0	0	0	0	0	0	0	2830	0	0	0	0	0	0	0	0	0	0	0	0	0
H2Bub	0	0	0	5305	0	0	0	0	7009	0	0	0	7074	8233	0	0	46579	0	0	2731	0	0	0	0	0	0	0	5126	0	0	0	0	0	6554	0	939	0	0	0	0	0	0	0	2187	50031	0	0	0	0
H2S112GlcNAc	0	0	0	0	0	0	0	0	0	0	0	0	0	0	0	0	0	0	0	0	0	0	0	0	0	0	0	0	0	0	0	0	0	0	0	0	0	0	0	0	0	0	0	0	386	0	0	0	0
H3	0	1197	12808	4632	1436797	126198	1921	623	65697	0	0	5871	86367	10276	3394	7694	57885	0	1406	15157	4527	1403	0	16315	2413	0	34608	67321	10423	3058	183850	0	14912	3075	50463	18546	0	0	0	0	0	0	63184	6332	399363	5094	0	0	0
H3.1	0	0	0	0	0	0	0	0	1719	0	0	0	0	0	0	0	0	0	0	0	0	0	0	0	0	0	0	0	0	0	0	0	0	35741	0	11368	0	0	0	0	0	0	0	0	4572	0	0	0	0
H3.2	0	0	0	0	0	0	0	0	0	0	0	0	0	0	0	0	0	0	0	0	0	0	0	0	0	0	0	0	0	0	0	0	0	560	0	0	0	0	0	0	0	0	0	0	626	0	0	0	0
H3.3	0	0	0	0	0	10304	8420	0	3768	0	0	0	5894	1092	0	0	0	0	0	8156	0	0	0	12236	5749	0	0	0	0	0	7412	0	0	7750	358885	49985	0	0	0	0	0	0	0	0	282246	0	0	0	0
H3.3 K27M mutant	0	0	0	0	0	0	0	0	0	0	0	0	0	5034	0	0	0	0	0	0	0	0	0	0	0	0	0	0	0	0	0	0	0	0	53888	0	0	0	0	0	0	0	0	0	0	0	0	0	0
H3.3B	0	0	0	0	0	0	0	0	0	0	0	0	0	0	0	0	0	0	0	0	0	0	1898	0	0	0	0	0	0	0	0	0	0	0	0	0	0	0	0	0	0	0	0	2860	0	0	0	0	0
H3.3S31ph	0	0	0	0	0	0	0	0	0	0	0	0	0	0	0	0	0	0	0	0	0	0	0	0	0	0	0	0	0	0	0	0	0	0	0	0	0	0	0	0	0	0	0	0	1291	0	0	0	0
H3.5	0	0	0	0	0	0	0	0	0	0	0	0	0	0	0	0	0	0	0	0	0	0	0	0	0	0	0	0	0	0	0	0	0	0	0	0	0	0	0	0	0	0	0	0	0	0	0	0	0
H3.6	0	0	0	0	0	0	0	0	0	0	0	0	0	0	0	0	0	0	0	0	0	0	0	0	0	0	0	0	0	0	0	0	0	0	0	0	0	0	0	0	0	0	0	0	0	0	0	0	0
H3.7	0	0	0	0	0	0	0	0	0	0	0	0	0	0	0	0	0	0	0	0	0	0	0	0	0	0	0	0	0	0	0	0	0	0	0	0	0	0	0	0	0	0	0	0	0	0	0	0	0
H3.Y	0	0	0	0	0	0	0	0	0	0	0	0	0	0	0	0	0	0	0	0	0	0	0	0	0	0	0	0	0	0	0	0	0	0	0	0	0	0	0	0	0	0	0	0	0	0	0	0	0
H3K122ac	0	0	0	0	96526	25322	0	0	611295	0	0	0	0	0	0	0	0	0	0	0	0	0	0	0	0	0	0	0	23	0	15772	0	0	0	269571	0	0	0	0	0	0	0	0	0	309501	0	0	0	0
H3K122sc	0	0	0	0	0	0	0	0	0	0	0	0	0	0	0	0	0	0	0	0	0	0	0	0	0	0	0	0	925	0	0	0	0	0	0	0	0	0	0	0	0	0	0	0	0	0	0	0	0
H3K12ac	0	0	0	0	0	0	0	0	0	0	0	0	3441	0	0	0	0	0	0	0	0	0	0	0	0	0	0	0	0	0	0	0	0	0	0	0	0	0	0	0	0	0	0	0	0	0	0	0	0
H3K14ac	0	0	1494	0	0	116385	0	654	81358	0	0	0	63547	0	0	0	14891	0	0	0	557	0	262	0	90469	0	0	0	0	0	11336	0	0	0	0	0	0	519	0	0	0	0	0	0	37525	1397	0	0	0
H3K14bu	0	0	0	0	0	0	0	0	0	0	0	0	0	0	0	0	0	0	0	0	0	0	0	0	0	0	0	0	0	2231	0	0	0	0	0	0	0	0	0	0	0	0	0	0	0	0	0	0	0
H3K14me3	0	0	0	0	0	0	0	0	0	0	0	0	0	0	0	0	0	0	0	0	0	7105	0	0	873	0	0	0	0	0	0	0	0	0	0	0	0	0	0	0	0	0	0	1832	0	0	0	0	0
H3K14pr	0	0	0	0	0	0	0	0	0	0	0	0	0	0	0	0	0	0	0	0	0	0	0	0	0	0	0	0	0	3983	0	0	0	0	0	0	0	0	0	0	0	0	0	0	0	0	0	0	0
H3K18ac	0	0	0	7495	128655	239710	168510	0	29003	0	0	0	0	36438	0	0	12697	0	0	83604	130	0	0	0	132604	0	1625	1183	0	0	409841	0	0	1744	0	0	0	0	0	0	0	0	0	240212	77150	302711	0	0	0
H3K18cr	0	0	0	0	0	29245	0	0	0	0	0	0	0	45889	7680	0	0	0	0	0	0	0	0	0	0	0	0	0	0	0	0	0	0	0	0	0	0	0	0	0	0	0	0	0	19806	0	0	0	0
H3K18la	0	0	0	0	0	22516	0	0	0	0	0	0	0	0	0	0	0	0	0	0	0	0	0	0	0	0	0	0	0	0	0	0	0	0	0	0	0	0	0	0	0	0	0	0	0	0	0	0	0
H3K20me1	0	0	0	0	0	0	0	0	0	0	0	0	0	0	0	0	0	0	0	0	0	0	0	0	0	0	0	0	0	0	0	0	0	0	0	250	0	0	0	0	0	0	0	0	0	0	0	0	0
H3K23ac	0	0	0	0	0	4357	0	0	65946	0	0	0	0	0	0	681	0	0	0	0	2159	0	0	0	0	0	0	0	0	0	8098	0	0	0	0	0	0	0	0	0	0	0	0	0	0	0	0	0	0
H3K23me1	0	0	1904	0	0	0	0	0	0	0	0	0	0	0	0	0	0	0	0	0	0	0	0	0	0	0	0	0	0	0	0	0	0	0	0	0	0	0	0	0	0	0	0	0	0	0	0	0	0
H3K23me2	0	0	1901	0	0	0	0	0	0	0	0	0	0	0	0	0	0	0	0	0	0	0	0	0	0	0	0	0	0	0	0	0	0	0	0	0	0	0	0	0	0	0	0	0	0	0	0	0	0
H3K23me3	0	0	10449	0	0	0	0	0	0	0	0	0	0	0	0	0	0	0	0	0	0	0	0	0	0	0	0	0	0	0	0	0	0	0	0	0	0	0	0	0	0	0	0	0	0	0	0	0	0
H3K26me3	0	0	0	0	0	0	0	6881	0	0	0	0	0	0	0	0	0	0	0	0	0	0	0	0	0	0	0	0	0	0	0	0	0	0	0	0	0	0	0	0	0	0	0	0	0	0	0	0	0
H3K27ac	894130	1808834	19744	120623	38114074	15829072	2930790	141817	12776441	3710535	8655306	2231082	430766	12037695	2148490	39462	155995	0	5958313	5537402	4641401	714229	1138460	904496	4430597	382839	2718	136993	2388131	6734655	7502984	575400	2139836	1442915	14746590	6742734	0	4910008	434874	3224515	2118637	224514	242676	5604554	15520107	9033579	36023	2383	517855
H3K27cr	0	0	0	0	0	0	0	0	0	0	0	0	0	13315	0	0	0	0	0	0	0	0	0	0	0	0	0	0	0	0	0	0	0	0	0	0	0	0	0	0	0	0	0	0	0	0	0	0	0
H3K27me1	0	0	0	4332	27565	2717	0	0	0	0	0	0	99	1174	921	4396	0	0	0	0	0	0	0	63	0	0	1639	4339	0	0	0	0	0	0	0	0	0	0	0	0	198	0	0	1000	34947	0	0	0	0
H3K27me2	0	0	0	38251	0	28130	0	0	728	0	0	0	192	820	1321	2600	4557	0	0	0	0	0	0	0	0	0	0	14279	0	0	964	0	0	623	1598	799	0	0	0	0	343	0	0	4475	81028	0	0	0	0
H3K27me3	1950	336809	38988	84659	3783566	2104676	30481	9596	1366490	70085	188932	128074	176965	477945	86720	3187	192857	4161	1177431	679056	175544	238386	17756	612601	49151	123659	16434	67569	224047	77263	154446	8725	28238	213416	788210	570353	0	79325	100560	18157	44890	2128	45891	1002337	2809525	788528	0	37447	27115
H3K27me3S28ph	0	0	0	0	0	0	0	0	0	0	0	0	0	0	0	0	0	0	0	0	0	0	0	0	0	0	0	0	0	0	0	0	0	0	0	6322	0	0	0	0	0	0	0	0	0	0	0	0	0
H3K34me3	0	0	0	0	0	24961	0	0	0	0	0	0	0	0	0	0	0	0	0	0	0	0	0	0	0	0	0	0	0	0	0	0	0	0	0	0	0	0	0	0	0	0	0	0	0	0	0	0	0
H3K36ac	0	0	0	0	0	28516	0	0	0	0	0	0	0	0	0	0	0	0	0	0	0	0	0	0	0	0	16707	0	132486	161	0	0	6941	0	0	0	0	0	0	0	0	0	0	0	0	0	0	0	0
H3K36me1	0	0	3214	0	0	5493	0	0	0	0	0	0	0	0	0	787	4170	0	0	0	0	0	0	0	0	0	1094	1714	0	0	0	0	0	0	0	0	0	0	0	0	0	0	0	0	0	0	0	0	0
H3K36me2	0	1314	0	18162	101749	70322	6402	0	9386	0	0	0	21242	0	0	9408	15368	0	0	1649	0	0	0	1893	4366	0	1842	0	0	0	1424	0	820	1046	869	742	0	4049	0	0	1780	0	0	924	14679	3332	0	0	0
H3K36me3	1064	1784	107352	39290	251176	770534	63352	61129	181066	2392	16501	3977	258531	537067	14299	22395	48666	0	171187	27479	19117	0	49903	224036	67412	27288	229352	42410	138352	287265	55443	218	45560	21146	45471	314710	0	11808	35576	1915	701	0	2760	180964	468723	118355	0	0	1415
H3K4ac	0	0	0	0	0	23166	0	0	175508	0	0	0	0	0	0	0	0	0	0	0	0	0	0	141	0	0	0	0	0	0	19523	0	0	0	0	0	0	0	31959	0	0	0	0	0	0	0	0	0	0
H3K4bhb	0	0	0	0	0	0	0	0	0	0	0	0	0	0	0	0	0	0	0	0	0	0	0	0	0	0	0	0	0	3089	0	0	0	0	0	0	0	0	0	0	0	0	0	0	0	0	0	0	0
H3K4me	0	0	0	0	0	0	0	0	0	0	0	0	0	0	0	0	0	0	0	0	0	0	0	0	0	0	0	0	0	0	0	0	0	0	19424	0	0	0	0	0	0	0	0	0	0	0	0	0	0
H3K4me1	314216	597240	5092	56292	15788863	9787356	1600915	558385	5164365	129585	467658	206131	296627	5000495	1498941	6111	90185	0	1645005	2009041	1751796	169282	736459	682242	1597516	427402	2527	89892	511445	1089584	2909573	173263	53211	340899	1043011	2764360	0	491106	816411	676448	294081	20974	237353	1825443	8401961	2203785	365294	4100	29245
H3K4me2	146789	301101	322	131347	4520956	6692986	617335	130653	3885606	83203	501195	25735	157382	1831497	829372	36082	16493	0	671354	1205604	696416	290703	75532	1124461	282010	0	0	39045	233641	557795	867833	67046	365547	240362	434545	898238	0	76096	199588	0	35569	0	64634	604094	7294546	1694288	0	0	0
H3K4me3	395118	409129	91785	304661	21512597	11989908	809532	154771	6852054	849230	2540363	433704	578991	5585489	757572	118575	153562	0	5492420	3522544	2682427	293042	753757	13072816	2257198	309675	207172	184671	1545015	3127567	4067713	474343	503536	1470782	5158404	5436073	0	1204559	923529	1385455	504681	198755	647439	6285476	24629741	2351478	122342	1661	283162
H3K4ox	0	0	0	0	0	0	0	0	64360	0	0	0	0	0	0	0	0	0	0	0	0	0	0	0	0	0	0	0	0	0	0	0	0	0	0	0	0	0	0	0	0	0	0	0	0	0	0	0	0
H3K56ac	3769	0	0	0	44884	96077	222197	0	0	0	0	0	0	0	0	0	0	0	0	0	114266	0	0	0	0	0	0	0	0	0	0	0	0	0	0	0	0	0	0	0	62941	0	0	0	1992	0	0	0	0
H3K5ac	0	0	0	0	60235	0	0	0	0	0	0	0	0	0	0	0	0	0	0	0	0	0	0	0	0	0	0	0	0	0	0	0	0	0	0	0	0	0	0	0	0	0	0	0	0	0	0	0	0
H3K64ac	0	0	0	0	0	0	0	0	0	0	0	0	0	0	0	0	0	0	0	0	0	0	0	0	0	0	0	0	0	0	0	0	0	0	0	0	0	0	0	0	0	0	0	0	159984	0	0	0	0
H3K79homocysteine	0	0	0	0	0	0	0	0	0	0	0	0	0	0	0	0	0	0	0	0	0	0	0	0	0	0	0	0	0	0	0	0	0	0	0	268	0	0	0	0	0	0	0	0	0	0	0	0	0
H3K79me1	0	0	0	0	0	16926	0	0	0	0	0	0	0	0	0	574	1346	0	0	0	96	0	0	526	0	0	0	10712	0	0	0	0	0	0	0	0	0	0	0	0	0	0	0	152	0	0	0	0	0
H3K79me2	0	0	0	20958	489598	147338	22724	0	384299	0	18387	37080	0	2889	449	7326	16525	0	571	16947	81258	10053	0	0	32102	0	2577	0	13283	10982	165233	3548	18487	5327	8661	64405	0	0	0	298	0	0	0	98700	108750	8346	0	0	0
H3K79me3	0	0	10215	8248	16445	32920	0	0	0	0	0	0	0	46442	0	8494	18981	0	0	932	630	0	0	273	12516	0	3502	6418	0	0	22050	0	0	1581	0	19837	0	0	85	0	0	0	0	12219	109741	0	0	0	0
H3K79suc	0	0	0	0	0	0	0	0	0	0	0	0	0	0	0	0	0	0	0	0	0	0	0	0	0	0	0	0	0	0	0	0	0	0	4236	0	0	0	0	0	0	0	0	0	0	0	0	0	0
H3K9K14K18K23K27ac	0	0	0	0	10100	0	0	0	0	0	0	0	0	0	0	0	0	0	0	0	0	0	0	0	0	0	0	0	0	0	0	0	0	0	0	0	0	0	0	0	0	0	0	0	0	0	0	0	0
H3K9K14ac	0	0	0	24294	617285	402614	0	0	179057	0	99891	0	0	0	0	0	0	0	0	290645	0	0	0	0	0	0	0	0	0	0	621353	0	0	44041	99874	667773	0	5985	0	0	0	0	0	7906	763342	13810	0	0	0
H3K9Kac	0	0	0	0	34905	0	0	0	0	0	0	0	0	0	0	0	0	0	0	0	0	0	0	0	0	0	0	0	0	0	0	0	0	0	0	0	0	0	0	0	0	0	0	0	0	0	0	0	0
H3K9S10me3	0	0	0	0	0	0	0	0	0	0	0	0	0	0	0	0	0	0	0	0	0	0	0	0	0	0	0	0	0	0	0	0	0	0	0	727	0	0	0	0	0	0	0	0	0	0	0	0	0
H3K9ac	0	0	0	28992	1296973	1799041	265817	176486	1086433	0	269703	136462	0	124583	220788	0	107801	0	409850	584125	244509	58524	84425	412296	421617	508066	1621	50042	380279	753209	513853	552	119938	16372	782076	781838	0	148687	548131	8999	79170	84853	0	94310	783879	0	0	2608	30416
H3K9acS10ph	0	0	0	0	0	0	0	0	0	0	0	0	0	0	0	2073	0	0	0	56213	0	0	0	0	0	0	2017	0	0	0	0	0	0	0	0	0	0	0	0	0	0	0	0	0	0	0	0	0	0
H3K9bhb	0	0	0	0	0	6851	0	0	0	0	0	0	0	0	0	0	0	0	0	0	0	0	0	0	0	0	0	0	0	12978	0	0	0	0	0	0	0	0	0	0	0	0	0	0	0	0	0	0	0
H3K9me1	0	0	0	0	6191	26198	0	559	0	0	1111	0	0	2681	0	603	3561	0	0	0	1099	0	0	0	0	0	1790	17027	3028	0	563	0	1024	0	0	0	0	0	0	0	0	0	0	2097	2301	0	0	0	0
H3K9me2	0	1886	40349	24208	252822	36473	4425	0	38040	2701	16857	8652	35766	17068	2411	34695	111922	0	17762	22442	0	0	0	14805	18202	0	125591	10354	0	33411	5866	1418	0	0	984	15238	0	0	0	2141	0	0	0	0	52742	22213	0	0	0
H3K9me3	68027	0	80350	469958	1291001	782527	102781	4737	469656	0	38670	0	347702	141529	111133	19813	32439	0	278125	288945	229984	2755	26932	55830	45799	0	42889	11702	364802	121880	360746	45112	7603	1183	352348	120283	0	98259	13908	77585	2357	0	1201	548072	1968961	33535	0	1491	0
H3Kac	0	0	0	0	0	17416	0	0	0	0	0	0	0	0	0	0	0	0	0	0	0	0	0	0	0	0	0	0	0	0	0	0	0	0	0	0	0	0	0	0	0	0	0	0	0	0	0	0	0
H3R17me2	0	0	0	0	0	0	0	0	623	0	0	0	0	0	0	0	0	0	0	6042	0	0	0	0	0	0	0	0	0	0	1769	0	0	0	0	0	0	0	0	0	0	0	0	0	0	0	0	0	0
H3R26cit	0	0	0	0	0	0	0	0	97308	0	0	0	0	0	0	0	0	0	0	0	0	0	0	0	0	0	0	0	0	0	0	0	0	0	0	0	0	0	0	0	0	0	0	0	94	0	0	0	0
H3R2me2	0	0	0	0	0	4847	5031	0	0	0	0	0	0	0	0	0	0	0	0	0	0	0	0	0	0	0	0	0	0	0	0	0	0	0	0	0	0	0	0	0	0	0	0	7871	0	0	0	0	0
H3R2me2K4me3	0	0	0	0	0	15489	0	0	0	0	0	0	0	0	0	0	0	0	0	0	0	0	0	0	0	0	0	0	0	0	0	0	0	0	0	0	0	0	0	0	0	0	0	0	0	0	0	0	0
H3R8me2	0	0	0	0	0	0	0	0	0	0	0	0	0	0	0	0	0	0	0	0	0	0	0	0	0	0	0	0	0	0	2484	0	0	0	404	0	0	0	0	0	0	0	0	0	0	0	0	0	0
H3S10ph	0	0	2857	0	0	2949	0	0	0	0	0	0	0	0	0	0	0	0	0	5111	0	0	0	0	0	0	0	0	0	0	0	0	0	90	0	0	0	0	0	0	0	0	0	0	8787	0	0	0	0
H3S10phK14ac	0	0	0	0	0	1883	0	0	0	0	0	0	0	0	0	0	0	0	0	0	0	0	0	0	0	0	0	0	0	0	0	0	0	0	0	0	0	0	0	0	0	0	0	0	0	0	0	0	0
H3S28ph	0	0	0	0	0	10335	0	0	0	0	0	371	0	0	0	0	0	0	0	3356	0	0	0	0	0	0	0	0	0	0	0	0	0	0	0	0	0	0	0	0	0	0	0	0	0	0	0	0	0
H3S31ph	0	0	0	0	0	10910	0	0	0	0	0	0	0	0	0	0	0	0	0	0	0	0	0	0	0	0	0	0	0	0	0	0	0	0	0	0	0	0	0	0	0	0	0	0	0	0	0	0	0
H3S57ph	0	0	0	0	0	0	5506	0	0	0	0	0	0	0	0	0	0	0	0	0	0	0	0	0	0	0	0	0	0	0	0	0	0	0	0	0	0	0	0	0	0	0	0	0	0	0	0	0	0
H3T11ph	0	0	0	0	0	0	0	0	0	0	0	0	0	0	0	0	0	0	0	0	0	0	0	0	0	0	0	0	0	0	0	0	0	0	0	0	0	0	0	0	0	0	0	0	0	1350	0	0	0
H3T45ph	0	0	0	0	0	0	0	0	1906	0	0	0	0	0	0	0	0	0	0	0	0	0	0	0	0	0	0	0	0	0	0	0	0	0	0	0	0	0	0	0	0	0	0	0	0	0	0	0	0
H3T6ph	0	0	0	0	0	0	0	0	0	0	0	0	0	0	0	0	0	0	0	0	0	0	0	0	0	0	0	0	0	0	0	0	0	0	0	0	0	0	0	0	0	0	0	0	0	578	0	0	0
H3ac	0	0	0	0	832233	197808	0	0	8668	0	79657	71438	157097	0	0	2041	8418	0	0	42308	0	0	0	0	24211	0	0	0	0	0	0	0	0	0	0	0	0	0	0	0	0	0	0	17209	170015	236110	0	0	0
H3mm11	0	0	0	0	0	0	0	0	0	0	0	0	0	0	0	0	0	0	0	0	0	0	0	0	0	0	0	0	0	0	0	0	0	730	0	0	0	0	0	0	0	0	0	0	0	0	0	0	0
H3mm12	0	0	0	0	0	0	0	0	0	0	0	0	0	0	0	0	0	0	0	0	0	0	0	0	0	0	0	0	0	0	0	0	0	1606	0	0	0	0	0	0	0	0	0	0	0	0	0	0	0
H3mm13	0	0	0	0	0	0	0	0	0	0	0	0	0	0	0	0	0	0	0	0	0	0	0	0	0	0	0	0	0	0	0	0	0	723	0	0	0	0	0	0	0	0	0	0	0	0	0	0	0
H3mm16	0	0	0	0	0	0	0	0	0	0	0	0	0	0	0	0	0	0	0	0	0	0	0	0	0	0	0	0	0	0	0	0	0	1658	0	0	0	0	0	0	0	0	0	0	0	0	0	0	0
H3mm7	0	0	0	0	0	0	0	0	0	0	0	0	0	0	0	0	0	0	0	0	0	0	0	0	0	0	0	0	0	0	0	0	0	428	0	0	0	0	0	0	0	0	0	0	0	0	0	0	0
H3mmT	0	0	0	0	0	0	0	0	0	0	0	0	0	0	0	0	0	0	0	0	0	0	0	0	0	0	0	0	0	0	0	0	0	660	0	0	0	0	0	0	0	0	0	0	0	0	0	0	0
H4	0	0	0	0	0	984	7453	93920	0	0	0	0	12055	0	0	7602	5716	0	0	0	1550	0	0	0	1903	0	9499	4283	0	0	179654	0	0	0	0	0	0	2060	0	0	0	0	0	0	0	0	0	0	0
H4K12ac	0	0	0	0	0	97841	0	0	707983	0	0	0	0	0	0	0	0	0	55702	0	579	0	0	34567	31118	0	0	0	0	0	14651	0	0	10766	0	46291	0	0	0	0	0	0	0	0	0	0	0	0	0
H4K12me1	0	0	0	0	0	0	0	0	0	0	0	0	0	0	0	0	0	0	0	0	0	0	0	0	0	0	0	0	0	0	0	0	0	0	0	0	0	0	0	0	0	0	0	0	0	608	0	0	0
H4K16ac	0	44277	0	10831	2744	53295	370	0	0	0	0	0	132655	12203	0	9954	135400	0	866	80254	991	0	1197	2113	57521	0	673	48304	0	0	180955	0	2811	17613	17308	0	0	0	0	0	0	0	0	0	47713	0	0	0	0
H4K20me1	0	0	0	12692	11688	4839	2094	17812	2627	0	2423	0	18566	0	0	35245	12047	0	0	4218	3076	0	0	0	0	0	7060	5411	763	0	6497	0	1644	0	7081	1102	0	0	9546	0	0	0	4710	1883	0	0	5099	0	0
H4K20me2	0	0	0	0	0	4527	20879	0	0	0	0	0	0	0	0	0	0	0	0	0	1057	0	0	0	0	0	0	0	0	0	0	0	0	0	0	0	0	0	0	0	0	0	0	0	0	0	0	0	0
H4K20me3	0	0	0	0	13616	819	975	0	355	0	0	0	0	0	0	0	0	0	0	10753	736	0	6490	742	0	0	0	0	0	0	17360	0	0	0	12892	3313	0	0	709	0	0	0	0	0	20142	8617	0	0	0
H4K4me3	0	0	0	0	0	0	0	0	42428	0	0	0	0	0	0	0	0	0	0	0	0	0	0	0	0	0	0	0	0	0	0	0	0	0	0	0	0	0	0	0	0	0	0	0	0	0	0	0	0
H4K5K8K12K16ac	0	0	0	0	76880	0	0	0	0	0	0	0	0	0	0	0	0	0	0	0	16564	0	0	0	0	0	0	0	0	0	0	0	0	0	0	0	0	0	0	0	0	0	0	0	0	0	0	0	0
H4K5K8K16ac	0	0	0	0	21295	0	0	0	0	0	0	0	0	0	0	0	0	0	0	0	0	0	0	0	0	0	0	0	0	0	0	0	0	0	0	0	0	0	0	0	0	0	0	0	0	0	0	0	0
H4K5K8ac	0	0	0	0	66897	0	0	0	0	0	0	0	0	0	0	0	0	0	0	0	0	0	0	0	0	0	0	0	0	0	224420	0	0	0	0	0	0	0	0	0	0	0	0	0	0	0	0	0	0
H4K5ac	0	0	0	0	0	217256	0	222731	0	0	0	0	0	0	0	0	7878	0	0	0	0	0	0	32788	47060	0	0	0	64482	0	34198	0	0	0	0	15577	0	0	140552	0	0	0	0	0	14147	4738	0	0	0
H4K5bu	0	0	0	0	0	0	0	0	0	0	0	0	0	0	0	0	0	0	0	0	0	0	0	15767	0	0	0	0	0	0	0	0	0	0	0	0	0	0	0	0	0	0	0	0	0	0	0	0	0
H4K8ac	0	0	1885	0	0	408100	0	0	317235	7335	0	0	0	0	0	1352	3469	0	0	0	590	0	0	43614	0	0	0	0	0	0	41523	0	0	0	0	0	0	0	0	0	0	0	0	0	8109	0	0	0	0
H4K8bhb	0	0	0	0	0	0	0	0	0	0	0	0	0	0	0	0	0	0	0	0	0	0	0	0	0	0	0	0	0	1394	0	0	0	0	0	0	0	0	0	0	0	0	0	0	0	0	0	0	0
H4K8bu	0	0	0	0	0	0	0	0	0	0	0	0	0	0	0	0	0	0	0	0	0	0	0	29405	0	0	0	0	0	0	0	0	0	0	0	0	0	0	0	0	0	0	0	0	0	0	0	0	0
H4K91ac	0	0	0	0	0	47571	0	0	0	0	0	0	0	0	0	0	0	0	0	0	6299	0	0	0	0	0	0	0	0	0	0	0	0	0	0	0	0	0	0	0	0	0	0	0	0	0	0	0	0
H4R3me2	0	0	0	0	64	0	0	0	0	0	0	0	0	0	0	0	0	0	0	0	0	0	0	0	0	0	0	0	0	0	969	0	0	0	0	0	0	702	0	0	0	0	0	0	0	0	0	0	0
H4R3me2s	0	0	0	0	0	2635	0	0	0	0	0	0	0	0	0	0	0	0	0	0	0	0	0	0	0	0	0	0	0	0	0	0	0	0	0	0	0	0	0	0	0	0	0	0	0	0	0	0	0
H4ac	0	0	0	0	36410	515372	0	0	0	0	3245	0	66479	0	0	0	0	0	0	176184	0	0	0	58844	2551	0	0	0	0	0	0	0	0	28065	0	0	0	0	71648	0	0	0	0	0	605588	22040	0	0	0
H4tetraac	0	0	0	0	0	0	0	0	0	0	0	0	0	0	0	0	0	0	0	0	0	0	0	0	0	0	16946	0	0	0	0	0	0	0	0	0	0	0	0	0	0	0	0	0	0	0	0	0	0
Hand1	0	0	0	0	0	0	0	0	0	0	0	0	0	0	0	0	0	0	0	0	0	0	0	0	0	0	0	0	0	0	0	0	0	0	0	0	0	0	0	0	0	0	0	0	2221	0	0	0	0
Hmga2	0	0	0	0	0	0	0	0	0	0	0	0	0	0	0	0	0	0	0	283	0	0	0	0	0	0	0	0	0	0	0	0	0	0	0	0	0	0	0	0	0	0	0	0	0	0	0	0	0
Hoxa9	0	0	0	0	0	1071	0	0	0	0	0	0	0	0	0	0	0	0	0	0	0	0	0	0	0	0	0	0	0	0	0	0	0	0	0	0	0	0	0	0	0	0	0	0	0	0	0	0	0
Pan lysine acetylation	0	0	0	0	0	0	0	0	0	0	0	0	0	0	0	0	0	0	0	0	0	0	0	2095	0	0	0	0	0	0	2820	0	0	0	0	0	0	0	0	0	0	0	0	0	0	0	0	0	0
Pan lysine crotonylation	0	0	0	0	0	0	0	0	0	0	0	0	0	0	0	0	0	0	0	0	0	0	0	77913	0	0	0	0	0	0	15238	0	0	0	0	0	0	0	0	0	0	0	0	0	0	0	0	0	0
TH2BS11ph	0	0	0	0	0	0	0	0	0	0	0	0	0	0	0	0	0	0	0	0	0	0	0	1335	0	0	0	0	0	0	0	0	0	0	0	0	0	0	0	0	0	0	0	0	0	0	0	0	0
WAPL	0	0	0	0	0	0	0	0	0	0	0	0	0	0	0	0	0	0	0	0	0	0	0	0	0	0	0	0	0	0	0	0	0	0	0	0	0	0	0	0	0	0	0	816	0	0	0	0	0
hcp-3	0	0	0	0	0	0	0	0	0	0	0	0	0	0	0	385	0	0	0	0	0	0	0	0	0	0	0	0	0	0	0	0	0	0	0	0	0	0	0	0	0	0	0	0	0	0	0	0	0
hcp-4	0	0	0	0	0	0	0	0	0	0	0	0	0	0	0	1677	0	0	0	0	0	0	0	0	0	0	0	0	0	0	0	0	0	0	0	0	0	0	0	0	0	0	0	0	0	0	0	0	0
htz-1	0	0	0	0	0	0	0	0	0	0	0	0	0	0	0	19155	0	0	0	0	0	0	0	0	0	0	50803	0	0	0	0	0	0	0	0	0	0	0	0	0	0	0	0	0	0	0	0	0	0
macroH2A	0	0	0	0	0	0	0	0	0	0	0	0	0	0	0	0	0	0	0	0	0	0	0	0	0	0	0	0	0	0	0	0	0	0	0	0	0	0	0	0	0	0	0	0	726	0	0	0	0
macroH2A1	0	0	0	0	11193	0	0	0	0	0	0	0	0	0	0	0	0	0	0	54581	4894	0	0	0	0	0	0	0	6157	0	31681	0	0	227658	4774	0	0	0	0	0	0	0	0	0	0	0	0	0	0
macroH2A1.2	0	0	0	0	6511	0	0	0	0	0	0	0	0	0	0	0	0	0	0	0	0	0	0	0	0	0	0	0	0	0	0	0	0	142449	0	0	0	0	0	0	0	0	0	0	0	0	0	0	0
macroH2A2	0	0	0	0	0	0	0	0	0	0	0	0	0	0	0	0	0	0	0	1876	2570	33064	0	0	0	0	0	0	15924	0	0	0	0	0	0	0	0	0	0	0	0	0	0	0	1958	0	0	0	0
[truncated: 5 more columns]

## Sheet: TFs - exp. counts
	TFs (All cell types AND threshold=05)	ce11	dm6	hg38	mm10	total_assemblies	total_experiments
	EPITOPE TAGS	9	78	751	969	4	1811
	GFP	89	66	280	136	4	575
	CTCF	0	25	825	710	3	1563
	MYC	0	13	202	119	3	337
	CREB1	0	6	31	81	3	121
	SMC3	0	2	39	67	3	111
	HDAC3	0	2	10	77	3	92
	JARID2	0	4	19	54	3	80
	CDK9	0	4	44	22	3	73
	TBP	0	7	25	32	3	67
	O-GLCNAC	0	36	19	5	3	63
	MAX	0	1	40	11	3	55
	BRDU	0	14	27	2	3	46
	SIN3A	0	2	13	28	3	46
	KDM4A	0	4	4	11	3	22
	HDAC4	0	2	2	2	3	9
	ESR1	0	0	963	61	2	1026
	AR	0	0	668	35	2	705
	BRD4	0	0	490	169	2	661
	FOXA1	0	0	444	52	2	498
	RAD21	0	0	154	324	2	480
	SPI1	0	0	182	272	2	456
	NR3C1	0	0	183	241	2	426
	EP300	0	0	232	182	2	416
	RELA	0	0	238	171	2	411
	SUZ12	0	0	78	319	2	399
	EZH2	0	0	165	176	2	343
	SMARCA4	0	0	176	135	2	313
	RNF2	0	0	66	221	2	289
	MED1	0	0	148	117	2	267
	POU5F1	0	0	51	200	2	253
	STAT3	0	0	127	86	2	215
	BIOTIN	0	0	39	173	2	214
	SOX2	0	0	51	151	2	204
	CEBPB	0	0	61	139	2	202
	STAT5A	0	0	15	172	2	189
	CEBPA	0	0	44	137	2	183
	RUNX1	0	0	89	75	2	166
	STAT1	0	0	42	116	2	160
	SMC1A	0	0	41	100	2	143
	PGR	0	0	131	8	2	141
	GATA3	0	0	97	39	2	138
	IRF4	0	0	17	111	2	130
	REST	0	0	86	41	2	129
	FOXA2	0	0	73	49	2	124
	BRD2	0	0	98	21	2	121
	JUN	0	0	73	46	2	121
	ERG	0	0	108	9	2	119
	KLF4	0	0	29	88	2	119
	ARNTL	0	0	28	88	2	118
	RXRA	0	0	23	92	2	117
	HSF1	0	0	72	38	2	112
	KDM1A	0	0	54	56	2	112
	GATA1	0	0	54	52	2	108
	VDR	0	0	48	58	2	108
	HNF4A	0	0	22	83	2	107
	PPARG	0	0	42	63	2	107
	TAL1	0	0	57	44	2	103
	NANOG	0	0	25	73	2	100
	GATA2	0	0	62	28	2	92
	CREBBP	0	0	36	52	2	90
	STAG1	0	0	53	32	2	87
	HDAC1	0	0	37	47	2	86
	HOXB13	0	0	80	3	2	85
	TRIM28	0	0	31	51	2	84
	CHD4	0	0	20	58	2	80
	MECP2	0	0	23	55	2	80
	FLI1	0	0	38	39	2	79
	YY1	0	0	48	29	2	79
	SRF	0	0	25	50	2	77
	FOS	0	0	48	26	2	76
	BRD3	0	0	61	10	2	73
	HDAC2	0	0	45	26	2	73
	HIF1A	0	0	56	14	2	72
	SMAD2	0	0	38	32	2	72
	ETS1	0	0	43	26	2	71
	KMT2D	0	0	26	43	2	71
	KMT2A	0	0	55	13	2	70
	RBPJ	0	0	34	34	2	70
	MED12	0	0	24	43	2	69
	WDR5	0	0	44	22	2	68
	MYCN	0	0	55	9	2	66
	GATA4	0	0	31	32	2	65
	XBP1	0	0	17	45	2	64
	CLOCK	0	0	9	51	2	62
	JUND	0	0	34	26	2	62
	LMNB1	0	0	26	34	2	62
	SMARCC1	0	0	47	13	2	62
	ARNT	0	0	46	12	2	60
	ATF4	0	0	42	16	2	60
	ARID1A	0	0	50	7	2	59
	TEAD4	0	0	36	21	2	59
	CBX7	0	0	20	36	2	58
	TCF3	0	0	13	43	2	58
	BATF	0	0	3	52	2	57
	CTNNB1	0	0	34	20	2	56
	KDM5B	0	0	50	3	2	55
	SMAD3	0	0	29	24	2	55
	MTF2	0	0	8	44	2	54
	NCOR2	0	0	6	46	2	54
	YAP1	0	0	38	13	2	53
	BCL6	0	0	32	18	2	52
	IRF8	0	0	4	45	2	51
	NIPBL	0	0	21	28	2	51
	RARA	0	0	31	18	2	51
	MBD3	0	0	7	41	2	50
	MEN1	0	0	25	23	2	50
	SUMO2	0	0	38	10	2	50
	EGR1	0	0	41	6	2	49
	E2F1	0	0	37	9	2	48
	KDM2B	0	0	13	33	2	48
	ATF3	0	0	17	28	2	47
	GABPA	0	0	29	16	2	47
	NCOR1	0	0	8	37	2	47
	FOXL2	0	0	40	4	2	46
	NELFE	0	0	34	10	2	46
	RPA1	0	0	1	43	2	46
	CAS9	0	0	22	21	2	45
	IKZF1	0	0	12	31	2	45
	JUNB	0	0	13	30	2	45
	MYOD1	0	0	14	29	2	45
	AHR	0	0	16	25	2	43
	ARID2	0	0	32	9	2	43
	ASCL1	0	0	25	16	2	43
	SMAD1	0	0	29	12	2	43
	STAT2	0	0	5	36	2	43
	STAT5B	0	0	12	29	2	43
	TEAD1	0	0	35	6	2	43
	TET1	0	0	1	40	2	43
	DNMT3A	0	0	8	32	2	42
	IRF1	0	0	19	21	2	42
	NRF1	0	0	22	18	2	42
	OTX2	0	0	28	12	2	42
	TCF7L2	0	0	26	14	2	42
	BMI1	0	0	23	16	2	41
	KDM6A	0	0	22	17	2	41
	MEIS1	0	0	6	32	2	40
	SMAD4	0	0	20	18	2	40
	NOTCH1	0	0	31	6	2	39
	TET2	0	0	18	19	2	39
	EBF1	0	0	6	30	2	38
	KMT2C	0	0	22	14	2	38
	NR1D1	0	0	1	35	2	38
	TFAP2C	0	0	32	4	2	38
	BCL11B	0	0	6	29	2	37
	CTCFL	0	0	25	10	2	37
	NELFA	0	0	18	17	2	37
	NFE2L2	0	0	20	15	2	37
	SETDB1	0	0	10	25	2	37
	DNMT3B	0	0	19	15	2	36
	KMT2B	0	0	6	28	2	36
	ATRX	0	0	7	26	2	35
	RUNX2	0	0	8	25	2	35
	BRCA1	0	0	25	7	2	34
	BRD9	0	0	23	9	2	34
	CDK8	0	0	24	8	2	34
	FOXP1	0	0	22	10	2	34
	GATA6	0	0	22	10	2	34
	LDB1	0	0	7	25	2	34
	PPARA	0	0	1	31	2	34
	TCF12	0	0	17	15	2	34
	AFF4	0	0	27	4	2	33
	ISL1	0	0	7	24	2	33
	ORC2	0	29	2	0	2	33
	PCGF2	0	0	9	22	2	33
	SOX9	0	0	10	21	2	33
	CBFB	0	0	9	21	2	32
	NFKB1	0	0	12	18	2	32
	PAX5	0	0	15	14	2	31
	SSRP1	0	0	13	16	2	31
	CBX3	0	0	10	18	2	30
	PCGF1	0	0	6	22	2	30
	RPA2	0	0	5	23	2	30
	TOP2B	0	0	21	7	2	30
	E2F4	0	0	9	18	2	29
	ELK1	0	0	9	18	2	29
	FOXP3	0	0	4	23	2	29
	MEF2D	0	0	1	26	2	29
	PCGF6	0	0	1	26	2	29
	RAD51	0	0	11	16	2	29
	CHD7	0	0	13	13	2	28
	HOXB1	0	0	1	25	2	28
	RUNX3	0	0	1	25	2	28
	SP1	0	0	9	17	2	28
	BCL11A	0	0	24	1	2	27
	GRHL2	0	0	20	5	2	27
	MAFK	0	0	11	14	2	27
	TCF4	0	0	14	11	2	27
	DPF2	0	0	13	11	2	26
	EHMT2	0	0	13	11	2	26
	FOSL2	0	0	13	11	2	26
	FOXO1	0	0	10	14	2	26
	KLF5	0	0	12	12	2	26
	OLIG2	0	0	11	13	2	26
	POU2F1	0	0	22	2	2	26
	SATB1	0	0	7	17	2	26
	SIX2	0	0	8	16	2	26
	SNAI2	0	0	23	1	2	26
	TBX5	0	0	8	16	2	26
	TCF7	0	0	7	17	2	26
	CHD8	0	0	17	6	2	25
	ELL2	0	0	20	3	2	25
	EOMES	0	0	6	17	2	25
	LEO1	0	0	10	13	2	25
	RYBP	0	0	6	17	2	25
	ERF	0	0	6	16	2	24
	FOSL1	0	0	17	5	2	24
	GPS2	0	0	1	21	2	24
	GTF2B	0	0	8	14	2	24
	IRF2	0	0	3	19	2	24
	MYB	0	0	19	3	2	24
	PAF1	0	0	13	9	2	24
	SS18	0	0	16	6	2	24
	TFAP2A	0	0	14	8	2	24
	TLE3	0	0	18	4	2	24
	TRPS1	0	0	20	2	2	24
	ZMYND8	0	0	14	8	2	24
	CBX5	0	0	6	15	2	23
	EPOP	0	0	5	16	2	23
	MED26	0	0	11	10	2	23
	MEF2C	0	0	4	17	2	23
	NCAPH2	0	0	8	13	2	23
	POU3F2	0	0	6	15	2	23
	RORC	0	0	2	19	2	23
	STAG2	0	0	10	11	2	23
	AGO2	0	13	7	0	2	22
	MEF2A	0	0	3	17	2	22
	SETD1A	0	0	2	18	2	22
	TBX21	0	0	4	16	2	22
	CHD1	0	0	17	2	2	21
	EED	0	0	3	16	2	21
	ELF1	0	0	17	2	2	21
	NFIB	0	0	1	18	2	21
	NR2F2	0	0	17	2	2	21
	AEBP2	0	0	6	12	2	20
	CIC	0	10	8	0	2	20
	HNF4G	0	0	7	11	2	20
	IRF3	0	0	9	9	2	20
	LMO2	0	0	8	10	2	20
	MITF	0	0	14	4	2	20
	PBX1	0	0	5	13	2	20
	PML	0	0	12	6	2	20
	RAG1	0	0	5	13	2	20
	STAT4	0	0	10	8	2	20
	TAF1	0	0	16	2	2	20
	5-HMC	0	0	8	9	2	19
	BHLHE40	0	0	6	11	2	19
	CXXC1	0	0	5	12	2	19
	MTA2	0	0	4	13	2	19
	MYOG	0	0	5	12	2	19
	TOP2A	0	0	12	5	2	19
	ZIC2	0	0	5	12	2	19
	CDX2	0	0	7	9	2	18
	GLI2	0	0	2	14	2	18
	GLYR1	0	0	14	2	2	18
	INO80	0	0	13	3	2	18
	KDM5C	0	0	8	8	2	18
	NFE2	0	0	9	7	2	18
	NR1H2	0	0	7	9	2	18
	USF2	0	0	9	7	2	18
	BACH1	0	0	6	9	2	17
	BAP1	0	0	12	3	2	17
	CBX2	0	0	4	11	2	17
	CBX8	0	0	9	6	2	17
	KDM5A	0	0	5	10	2	17
	METTL3	0	0	5	10	2	17
	PAX6	0	0	4	11	2	17
	RB1	0	0	13	2	2	17
	TET3	0	0	4	11	2	17
	USF1	0	0	12	3	2	17
	ZEB1	0	0	14	1	2	17
	ZMYND11	0	0	5	10	2	17
	BCOR	0	0	10	4	2	16
	EGR2	0	0	3	11	2	16
	HNF1A	0	0	11	3	2	16
	IRF9	0	0	3	11	2	16
	MLLT3	0	0	12	2	2	16
	NCAPG	0	0	12	2	2	16
	NEUROD1	0	0	10	4	2	16
	NR1H3	0	0	6	8	2	16
	ONECUT2	0	0	8	6	2	16
	PAX7	0	0	1	13	2	16
	PRDM1	0	0	9	5	2	16
	RAG2	0	0	1	13	2	16
	RBBP5	0	0	9	5	2	16
	RELB	0	0	8	6	2	16
	SOX17	0	0	6	8	2	16
	SREBF1	0	0	5	9	2	16
	SUMO1	0	0	5	9	2	16
	BACH2	0	0	5	8	2	15
	GFI1	0	0	1	12	2	15
	JMJD6	0	0	12	1	2	15
	KAT2A	0	0	9	4	2	15
	KDM4C	0	0	5	8	2	15
	NCOA2	0	0	9	4	2	15
	NKX2-1	0	0	8	5	2	15
	NR5A1	0	0	9	4	2	15
	PDX1	0	0	7	6	2	15
	PHF8	0	0	9	4	2	15
	THAP11	0	0	12	1	2	15
	ZBTB17	0	0	10	3	2	15
	5-MC	0	0	6	6	2	14
	AML1-ETO	0	0	10	2	2	14
	ELK4	0	0	7	5	2	14
	GTF3C2	0	0	11	1	2	14
	KDM6B	0	0	4	8	2	14
	MAFG	0	0	4	8	2	14
	MBD2	0	0	7	5	2	14
	MPHOSPH8	0	0	10	2	2	14
	NEUROD2	0	0	1	11	2	14
	NFYA	0	0	5	7	2	14
	NR4A1	0	0	5	7	2	14
	PCGF5	0	0	1	11	2	14
	REL	0	0	3	9	2	14
	SALL4	0	0	4	8	2	14
	SCML2	0	0	10	2	2	14
	SOX3	0	0	3	9	2	14
	T	0	0	6	6	2	14
	UBTF	0	0	4	8	2	14
	CBFA2T3	0	0	4	7	2	13
	CBX1	0	0	4	7	2	13
	EP400	0	0	5	6	2	13
	GFI1B	0	0	7	4	2	13
	HCFC1	0	0	5	6	2	13
	HIRA	0	0	8	3	2	13
	IRF5	0	0	8	3	2	13
	LEF1	0	0	7	4	2	13
	NCOA3	0	0	9	2	2	13
	NR1H4	0	0	2	9	2	13
	PROX1	0	0	4	7	2	13
	SIRT6	0	0	8	3	2	13
	SMCHD1	0	0	5	6	2	13
	ATF7	0	0	1	9	2	12
	BRF1	0	0	9	1	2	12
	CEBPD	0	0	3	7	2	12
	CRTC2	0	0	2	8	2	12
	E2F3	0	0	1	9	2	12
	ESRRA	0	0	4	6	2	12
	ICE1	0	4	6	0	2	12
	MAFF	0	0	3	7	2	12
	MXI1	0	0	8	2	2	12
	NFATC1	0	0	6	4	2	12
	STAT6	0	0	1	9	2	12
	THRA	0	0	9	1	2	12
	TOP1	0	0	7	3	2	12
	TWIST1	0	0	7	3	2	12
	CBFA2T2	0	0	1	8	2	11
	CDK12	0	2	7	0	2	11
	CDK7	0	0	8	1	2	11
	CHD2	0	0	5	4	2	11
	FOXK1	0	0	5	4	2	11
	HDAC6	0	2	7	0	2	11
	HNF1B	0	0	6	3	2	11
	KAT8	0	0	1	8	2	11
	KDM2A	0	0	1	8	2	11
	LYL1	0	0	7	2	2	11
	MAF	0	0	3	6	2	11
	NFATC2	0	0	8	1	2	11
	NUP98	0	0	7	2	2	11
	PARP1	0	0	5	4	2	11
	PITX1	0	0	1	8	2	11
	RCOR2	0	0	2	7	2	11
	SMARCA5	0	0	1	8	2	11
	TFAM	0	0	5	4	2	11
	TFAP4	0	0	6	3	2	11
	USP7	0	0	7	2	2	11
	BATF3	0	0	5	3	2	10
	DDX21	0	0	7	1	2	10
	ETS2	0	0	1	7	2	10
	ETV5	0	0	1	7	2	10
	FOSB	0	0	1	7	2	10
	FOXF1	0	0	6	2	2	10
	KAT5	0	0	2	6	2	10
	LHX2	0	0	1	7	2	10
	LIN9	0	0	4	4	2	10
	MAZ	0	0	6	2	2	10
	MCRS1	0	0	6	2	2	10
	NKX3-1	0	0	3	5	2	10
	PSIP1	0	0	4	4	2	10
	RUVBL2	0	0	6	2	2	10
	SIRT7	0	0	2	6	2	10
	SIX1	0	0	5	3	2	10
	TRF2	0	2	6	0	2	10
	ZBTB16	0	0	5	3	2	10
	8-HYDROXYDEOXYGUANOSINE	0	0	5	2	2	9
	ARID3A	0	0	2	5	2	9
	ASH1L	0	0	4	3	2	9
	ASXL1	0	0	1	6	2	9
	CDC73	0	0	1	6	2	9
	DDX5	0	0	3	4	2	9
	EHF	0	0	6	1	2	9
	GRHL3	0	0	3	4	2	9
	HAND2	0	0	4	3	2	9
	HOXA11	0	0	1	6	2	9
	HSF2	0	0	4	3	2	9
	KAT2B	0	0	4	3	2	9
	KDM3A	0	0	4	3	2	9
	KLF6	0	0	2	5	2	9
	MTA1	0	0	4	3	2	9
	NFIC	0	0	5	2	2	9
	NR5A2	0	0	4	3	2	9
	PHC1	0	0	6	1	2	9
	PHF19	0	0	4	3	2	9
	PRDM10	0	0	1	6	2	9
	RUVBL1	0	0	5	2	2	9
	SIRT1	0	0	6	1	2	9
	SOX11	0	0	2	5	2	9
	ARID1B	0	0	4	2	2	8
	ATF2	0	0	4	2	2	8
	ATOH1	0	0	2	4	2	8
	CARM1	0	0	5	1	2	8
	CTR9	0	0	1	5	2	8
	FOXH1	0	0	2	4	2	8
	GTF2F1	0	0	5	1	2	8
	HDGF2	0	0	2	4	2	8
	HNRNPK	0	0	5	1	2	8
	HNRNPL	0	0	4	2	2	8
	JMJD1C	0	0	4	2	2	8
	MCM2	0	4	2	0	2	8
	MYBL1	0	0	1	5	2	8
	NFYB	0	0	5	1	2	8
	NKX2-5	0	0	3	3	2	8
	RFX2	0	0	2	4	2	8
	TAF3	0	0	3	3	2	8
	TERF1	0	0	4	2	2	8
	USP22	0	0	4	2	2	8
	YBX1	0	0	3	3	2	8
	ZFP64	0	0	4	2	2	8
	ZSCAN5B	0	0	4	2	2	8
	BRF2	0	0	4	1	2	7
	ELF4	0	0	1	4	2	7
	ELK3	0	0	1	4	2	7
	FAM208A	0	0	3	2	2	7
	FGFR1	0	0	2	3	2	7
	HEXIM1	0	0	3	2	2	7
	HEYL	0	0	1	4	2	7
	HOXA13	0	0	1	4	2	7
	IKZF3	0	0	2	3	2	7
	IRF2BP2	0	0	4	1	2	7
	LHX6	0	0	1	4	2	7
	NFAT5	0	0	1	4	2	7
	NFKBIA	0	0	1	4	2	7
	NKX6-1	0	0	1	4	2	7
	OGT	0	0	1	4	2	7
	PAXIP1	0	0	1	4	2	7
	POU2AF1	0	0	3	2	2	7
	PRDM14	0	0	2	3	2	7
	SFMBT1	0	0	3	2	2	7
	SOX10	0	0	1	4	2	7
	SRSF1	0	0	2	3	2	7
	TAF15	0	0	3	2	2	7
	TCF7L1	0	0	4	1	2	7
	ZBTB24	0	0	3	2	2	7
	AICDA	0	0	1	3	2	6
	ASXL3	0	0	2	2	2	6
	AUTS2	0	0	1	3	2	6
	BBX	0	0	1	3	2	6
	DAXX	0	0	2	2	2	6
	DDIT3	0	0	2	2	2	6
	FOXJ2	0	0	1	3	2	6
	HIC2	0	0	1	3	2	6
	HOXB4	0	0	1	3	2	6
	KDM3B	0	0	2	2	2	6
	L3MBTL2	0	0	2	2	2	6
	MYF5	0	0	1	3	2	6
	NFE2L1	0	0	1	3	2	6
	OVOL2	0	0	3	1	2	6
	PHF6	0	0	1	3	2	6
	RBBP4	0	0	1	3	2	6
	SNAI1	0	0	2	2	2	6
	TAF2	0	0	2	2	2	6
	TLX1	0	0	2	2	2	6
	YEATS4	0	0	3	1	2	6
	ZBTB2	0	0	1	3	2	6
	ZC3H11A	0	0	1	3	2	6
	ZFP42	0	0	3	1	2	6
	ARID4B	0	0	2	1	2	5
	BHLHE41	0	0	1	2	2	5
	DR1	0	0	1	2	2	5
	ETV6	0	0	1	2	2	5
	GLI1	0	0	1	2	2	5
	ID2	0	0	1	2	2	5
	KLF3	0	0	2	1	2	5
	MAFB	0	0	2	1	2	5
	MBD1	0	0	1	2	2	5
	MTOR	0	0	2	1	2	5
	NONO	0	0	2	1	2	5
	PHF2	0	0	2	1	2	5
	POU2F3	0	0	1	2	2	5
	PRMT5	0	0	2	1	2	5
	RARB	0	0	2	1	2	5
	SAFB2	0	0	2	1	2	5
	SIX4	0	0	1	2	2	5
	UPF1	0	2	1	0	2	5
	YY2	0	0	2	1	2	5
	ZKSCAN1	0	0	1	2	2	5
	ZMIZ1	0	0	1	2	2	5
	ATF7IP	0	0	1	1	2	4
	CRY1	0	0	1	1	2	4
	DICER1	0	0	1	1	2	4
	ELL	0	0	1	1	2	4
	ERCC3	0	0	1	1	2	4
	HOXD13	0	0	1	1	2	4
	LHX5	0	0	1	1	2	4
	NFYC	0	0	1	1	2	4
	NUP153	0	0	1	1	2	4
	PARK7	0	0	1	1	2	4
	SAFB	0	0	1	1	2	4
	SPIN1	0	0	1	1	2	4
	TP53	0	0	217	0	1	218
	DMC1	0	0	0	105	1	106
	LMNA	0	0	74	0	1	75
	CLAMP	0	66	0	0	1	67
	SUPT5H	0	0	54	0	1	55
	TP63	0	0	52	0	1	53
	SMARCB1	0	0	41	0	1	42
	MSL-2	0	39	0	0	1	40
	ESRRB	0	0	0	38	1	39
	CP190	0	37	0	0	1	38
	HAP1	0	0	36	0	1	37
	EPAS1	0	0	35	0	1	36
	AMA-1	34	0	0	0	1	35
	DPY-27	34	0	0	0	1	35
	TRL	0	34	0	0	1	35
	BCD	0	30	0	0	1	31
	MSL-3	0	29	0	0	1	30
	LHX3	0	0	0	27	1	28
	PC	0	27	0	0	1	28
	PHA-4	27	0	0	0	1	28
	KSHV LANA	0	0	26	0	1	27
	PHO	0	26	0	0	1	27
	RHI	0	26	0	0	1	27
	SU(VAR)205	0	25	0	0	1	26
	CBP	0	24	0	0	1	25
	FOXM1	0	0	24	0	1	25
	NFIA	0	0	0	24	1	25
	AFF1	0	0	23	0	1	24
	UBX	0	23	0	0	1	24
	ZFP384	0	0	0	23	1	24
	PH-D	0	22	0	0	1	23
	SMARCA2	0	0	22	0	1	23
	SU(HW)	0	22	0	0	1	23
	ZFX	0	0	21	0	1	22
	FS(1)H	0	20	0	0	1	21
	MEF2B	0	0	20	0	1	21
	TRP53	0	0	0	19	1	20
	ZNF143	0	0	19	0	1	20
	BAZ1B	0	0	0	18	1	19
	DPL-1	18	0	0	0	1	19
	MRG-1	18	0	0	0	1	19
	ONECUT1	0	0	0	18	1	19
	PIAS1	0	0	18	0	1	19
	POLR2C	0	0	18	0	1	19
	NCOA1	0	0	17	0	1	18
	NR2C2	0	0	17	0	1	18
	PSC	0	17	0	0	1	18
	EFL-1	16	0	0	0	1	17
	INTS13	0	0	16	0	1	17
	LEM-2	16	0	0	0	1	17
	PRDM9	0	0	0	16	1	17
	SDC-3	16	0	0	0	1	17
	SPEN	0	0	0	16	1	17
	TERF2IP	0	0	0	16	1	17
	TWI	0	16	0	0	1	17
	ZBTB48	0	0	16	0	1	17
	ZNF274	0	0	16	0	1	17
	BEAF-32	0	15	0	0	1	16
	GTF2I	0	0	15	0	1	16
	HMR	0	15	0	0	1	16
	DOT1L	0	0	14	0	1	15
	EBF2	0	0	0	14	1	15
	LIN-35	14	0	0	0	1	15
	MORC2	0	0	14	0	1	15
	PQN-85	14	0	0	0	1	15
	RUNX1T1	0	0	14	0	1	15
	SNPC-4	14	0	0	0	1	15
	TP53BP1	0	0	14	0	1	15
	ZBTB7A	0	0	14	0	1	15
	ACF	0	13	0	0	1	14
	CG7946	0	13	0	0	1	14
	CPSF3L	0	0	13	0	1	14
	HPL-2	13	0	0	0	1	14
	MOD(MDG4)	0	13	0	0	1	14
	MYT1L	0	0	0	13	1	14
	PTF1A	0	0	0	13	1	14
	RCOR1	0	0	13	0	1	14
	TRR	0	13	0	0	1	14
	ZBTB33	0	0	13	0	1	14
	BRD7	0	0	12	0	1	13
	ELF5	0	0	0	12	1	13
	ETV1	0	0	12	0	1	13
	HDA-1	12	0	0	0	1	13
	KLE-2	12	0	0	0	1	13
	LIN-13	12	0	0	0	1	13
	MOF	0	12	0	0	1	13
	NUTM1	0	0	12	0	1	13
	RFX5	0	0	12	0	1	13
	UBE3A	0	0	12	0	1	13
	UNC-62	12	0	0	0	1	13
	ZFP57	0	0	0	12	1	13
	CAP-H2	0	11	0	0	1	12
	CDKN1B	0	0	11	0	1	12
	DPY-26	11	0	0	0	1	12
	ELOB	0	0	0	11	1	12
	MYBL2	0	0	11	0	1	12
	MYSM1	0	0	0	11	1	12
	CEC-3	10	0	0	0	1	11
	DRE4	0	10	0	0	1	11
	E(Z)	0	10	0	0	1	11
	GRH	0	10	0	0	1	11
	LIN-39	10	0	0	0	1	11
	LSY-2	10	0	0	0	1	11
	MYH11	0	0	10	0	1	11
	NEUROG2	0	0	0	10	1	11
	NHR-11	10	0	0	0	1	11
	PAX3	0	0	0	10	1	11
	PAX8	0	0	10	0	1	11
	PCGF3	0	0	0	10	1	11
	PRKCQ	0	0	10	0	1	11
	SFPQ	0	0	10	0	1	11
	SREBF2	0	0	10	0	1	11
	SSRP	0	10	0	0	1	11
	SUPT6H	0	0	10	0	1	11
	TRIM24	0	0	10	0	1	11
	TRIM33	0	0	0	10	1	11
	WT1	0	0	0	10	1	11
	ZNF366	0	0	10	0	1	11
	CDCA5	0	0	9	0	1	10
	EGL-5	9	0	0	0	1	10
	EZH1	0	0	0	9	1	10
	GATAD2A	0	0	9	0	1	10
	GATAD2B	0	0	9	0	1	10
	GTF3C1	0	0	0	9	1	10
	LPT	0	9	0	0	1	10
	MAPK1	0	0	9	0	1	10
	NLRC5	0	0	0	9	1	10
	PES-1	9	0	0	0	1	10
	PHIP	0	0	9	0	1	10
	PRDM15	0	0	0	9	1	10
	PSQ	0	9	0	0	1	10
	SIN3B	0	0	0	9	1	10
	SOD1	0	0	9	0	1	10
	SP3	0	0	0	9	1	10
	TFE3	0	0	0	9	1	10
	VFL	0	9	0	0	1	10
	ZFP281	0	0	0	9	1	10
	ZIC5	0	0	9	0	1	10
	AFF3	0	0	0	8	1	9
	ASH1	0	8	0	0	1	9
	CDK11A	0	0	8	0	1	9
	CES-1	8	0	0	0	1	9
	CPSF3	0	0	8	0	1	9
	CSF1R	0	0	8	0	1	9
	CUX1	0	0	8	0	1	9
	DGCR8	0	0	0	8	1	9
	DNMT1	0	0	8	0	1	9
	DVE-1	8	0	0	0	1	9
	EN1	0	0	8	0	1	9
	FOS-1	8	0	0	0	1	9
	JIL-1	0	8	0	0	1	9
	LIN-15B	8	0	0	0	1	9
	LIN-37	8	0	0	0	1	9
	LIN-54	8	0	0	0	1	9
	LIN-9	8	0	0	0	1	9
	MAPK8	0	0	0	8	1	9
	MED16	0	0	8	0	1	9
	METHYLCAP	0	0	8	0	1	9
	MGMT	0	0	8	0	1	9
	MI-2	0	8	0	0	1	9
	NHR-237	8	0	0	0	1	9
	NHR-28	8	0	0	0	1	9
	NHR-6	8	0	0	0	1	9
	NHR-77	8	0	0	0	1	9
	POU3F1	0	0	0	8	1	9
	PRKDC	0	0	8	0	1	9
	RPD3	0	8	0	0	1	9
	SAX-3	8	0	0	0	1	9
	SDC-2	8	0	0	0	1	9
	SKN-1	8	0	0	0	1	9
	SUPT6	0	0	0	8	1	9
	TCF21	0	0	8	0	1	9
	VTD	0	8	0	0	1	9
	ZAG-1	8	0	0	0	1	9
	AGO1	0	0	7	0	1	8
	BDP1	0	0	7	0	1	8
	CBP-1	7	0	0	0	1	8
	CD74	0	0	7	0	1	8
	CHAF1A	0	0	7	0	1	8
	DPPA2	0	0	0	7	1	8
	DPY-30	7	0	0	0	1	8
	E2F7	0	0	7	0	1	8
	HP1C	0	7	0	0	1	8
	HTT	0	0	0	7	1	8
	INSV	0	7	0	0	1	8
	LIN-52	7	0	0	0	1	8
	MIX-1	7	0	0	0	1	8
	MSL-1	0	7	0	0	1	8
	POU2F2	0	0	7	0	1	8
	PPP1R10	0	0	7	0	1	8
	PRDM16	0	0	0	7	1	8
	SD	0	7	0	0	1	8
	SU(VAR)2-HP2	0	7	0	0	1	8
	SU(VAR)3-3	0	7	0	0	1	8
	SUPT5	0	0	0	7	1	8
	TRA-1	7	0	0	0	1	8
	XRCC4	0	0	7	0	1	8
	ZBTB11	0	0	0	7	1	8
	ZFPM1	0	0	0	7	1	8
	ZNF711	0	0	7	0	1	8
	ACT5C	0	6	0	0	1	7
	ADA2B	0	6	0	0	1	7
	ALY-2	6	0	0	0	1	7
	ASH2L	0	0	0	6	1	7
	BCL10	0	0	6	0	1	7
	BLMP-1	6	0	0	0	1	7
	BSG25A	0	6	0	0	1	7
	CEH-82	6	0	0	0	1	7
	CG8478	0	6	0	0	1	7
	CHRO	0	6	0	0	1	7
	CRTC1	0	6	0	0	1	7
	DAF-12	6	0	0	0	1	7
	DNTTIP1	0	0	0	6	1	7
	DPPA4	0	0	0	6	1	7
	DPY-28	6	0	0	0	1	7
	DREF	0	6	0	0	1	7
	E2F6	0	0	6	0	1	7
	EBF3	0	0	6	0	1	7
	EBNA1	0	0	6	0	1	7
	ELBA2	0	6	0	0	1	7
	ELBA3	0	6	0	0	1	7
	ELT-3	6	0	0	0	1	7
	ERCC6	0	0	6	0	1	7
	GLTSCR1	0	0	6	0	1	7
	GRIP1	0	0	0	6	1	7
	HCP-6	6	0	0	0	1	7
	HP1B	0	6	0	0	1	7
	INSR	0	0	6	0	1	7
	2022-06-01	6	0	0	0	1	7
	LAM	0	6	0	0	1	7
	LARP7	0	0	6	0	1	7
	LIN-61	6	0	0	0	1	7
	MAB-5	6	0	0	0	1	7
	MAGO	0	6	0	0	1	7
	MGA	0	0	6	0	1	7
	NACA	0	0	0	6	1	7
	NCAPD3	0	0	0	6	1	7
	NEDD4	0	0	6	0	1	7
	NFYA-1	6	0	0	0	1	7
	NHR-12	6	0	0	0	1	7
	NUP98-96	0	6	0	0	1	7
	NURF-1	6	0	0	0	1	7
	PHRF1	0	0	0	6	1	7
	PKNOX1	0	0	0	6	1	7
	POF	0	6	0	0	1	7
	R02D3.7	6	0	0	0	1	7
	RBM25	0	0	6	0	1	7
	REC-8	6	0	0	0	1	7
	SCE	0	6	0	0	1	7
	SIN-3	6	0	0	0	1	7
	SKI	0	0	6	0	1	7
	SOX4	0	0	0	6	1	7
	SU(VAR)3-7	0	6	0	0	1	7
	SUPT16	0	0	0	6	1	7
	TBP-1	6	0	0	0	1	7
	TRIM25	0	0	6	0	1	7
	TRX	0	6	0	0	1	7
	XPO1	0	0	6	0	1	7
	XRN2	0	0	6	0	1	7
	ZNF341	0	0	6	0	1	7
	ZTF-11	6	0	0	0	1	7
	ZTF-4	6	0	0	0	1	7
	ACSS2	0	0	0	5	1	6
	ALR-1	5	0	0	0	1	6
	ART1	0	0	0	5	1	6
	ASCL2	0	0	0	5	1	6
	BAZ1A	0	0	0	5	1	6
	BCL9	0	0	5	0	1	6
	BIGH1	0	5	0	0	1	6
	CAPG-1	5	0	0	0	1	6
	CAPG-2	5	0	0	0	1	6
	DCP1A	0	0	5	0	1	6
	DL	0	5	0	0	1	6
	ECR	0	5	0	0	1	6
	FUS	0	0	5	0	1	6
	GREB1	0	0	5	0	1	6
	GRHL1	0	0	5	0	1	6
	HAM-1	5	0	0	0	1	6
	HAND1	0	0	5	0	1	6
	HMGB2	0	0	5	0	1	6
	HOXA9	0	0	5	0	1	6
	HOXB7	0	0	5	0	1	6
	INTS3	0	0	5	0	1	6
	KLF9	0	0	0	5	1	6
	L(3)MBT	0	5	0	0	1	6
	LET-418	5	0	0	0	1	6
	M1BP	0	5	0	0	1	6
	MAD	0	5	0	0	1	6
	METTL14	0	0	5	0	1	6
	NETO2	0	0	5	0	1	6
	NFIL3	0	0	0	5	1	6
	NKX2-2	0	0	0	5	1	6
	ORC1	0	0	5	0	1	6
	PBRM1	0	0	0	5	1	6
	PBX3	0	0	5	0	1	6
	PCF11	0	0	5	0	1	6
	RARG	0	0	0	5	1	6
	RBL2	0	0	5	0	1	6
	SAP30	0	0	5	0	1	6
	SF3B1	0	0	5	0	1	6
	SIX5	0	0	5	0	1	6
	SMC5	0	0	0	5	1	6
	SOX6	0	0	0	5	1	6
	SPDEF	0	0	5	0	1	6
	SU(Z)12	0	5	0	0	1	6
	TGIF1	0	0	0	5	1	6
	USP16	0	0	0	5	1	6
	ZFP143	0	0	0	5	1	6
	ZIC1	0	0	0	5	1	6
	ZNF263	0	0	5	0	1	6
	ABD-A	0	4	0	0	1	5
	ABD-B	0	4	0	0	1	5
	ADF1	0	4	0	0	1	5
	AHA-1	4	0	0	0	1	5
	ATXN7L3	0	0	4	0	1	5
	CASZ1	0	0	4	0	1	5
	CEBPE	0	0	0	4	1	5
	CEH-28	4	0	0	0	1	5
	CEH-30	4	0	0	0	1	5
	CG4747	0	4	0	0	1	5
	COH-1	4	0	0	0	1	5
	COH-3	4	0	0	0	1	5
	CREB3L2	0	0	0	4	1	5
	CREB5	0	0	4	0	1	5
	CRX	0	0	0	4	1	5
	CTBP1	0	0	4	0	1	5
	DBP	0	0	0	4	1	5
	DCP2	0	0	4	0	1	5
	DDX11	0	0	4	0	1	5
	DENDRA2	0	0	0	4	1	5
	DP1	0	4	0	0	1	5
	DUXBL1	0	0	0	4	1	5
	EBF4	0	0	0	4	1	5
	EBNA2	0	0	4	0	1	5
	EGFR	0	0	4	0	1	5
	EGL-27	4	0	0	0	1	5
	ELAV	0	4	0	0	1	5
	ELF3	0	0	4	0	1	5
	ELT-1	4	0	0	0	1	5
	EOR-1	4	0	0	0	1	5
	EPCAM	0	0	4	0	1	5
	ETV4	0	0	4	0	1	5
	EWSR1	0	0	4	0	1	5
	FANCD2	0	0	4	0	1	5
	FKH-10	4	0	0	0	1	5
	FOXN3	0	0	4	0	1	5
	FOXO	0	4	0	0	1	5
	FOXO3	0	0	0	4	1	5
	GCKR	0	0	0	4	1	5
	GCM1	0	0	0	4	1	5
	GMEB2	0	0	4	0	1	5
	GMNN	0	0	0	4	1	5
	HDGFRP2	0	0	0	4	1	5
	HELLS	0	0	0	4	1	5
	HEY1	0	0	4	0	1	5
	HLH-1	4	0	0	0	1	5
	HLH-30	4	0	0	0	1	5
	HNRNPU	0	0	0	4	1	5
	IMB-1	4	0	0	0	1	5
	IRBP	0	4	0	0	1	5
	KANSL3	0	0	0	4	1	5
	KAT7	0	0	4	0	1	5
	KDM2	0	4	0	0	1	5
	LGR1	0	4	0	0	1	5
	LIN-11	4	0	0	0	1	5
	LMO1	0	0	4	0	1	5
	LYSE	0	4	0	0	1	5
	MAF1	0	0	4	0	1	5
	MAML3	0	0	4	0	1	5
	MAP2K1	0	0	4	0	1	5
	MAPK14	0	0	4	0	1	5
	MDL-1	4	0	0	0	1	5
	MECOM	0	0	4	0	1	5
	MED23	0	0	0	4	1	5
	MED24	0	0	0	4	1	5
	MEP-1	4	0	0	0	1	5
	MKL1	0	0	0	4	1	5
	MKL2	0	0	0	4	1	5
	MLE	0	4	0	0	1	5
	MLLT1	0	0	4	0	1	5
	MLXIP	0	0	4	0	1	5
	MNT	0	0	0	4	1	5
	MRG15	0	4	0	0	1	5
	MSL2	0	0	0	4	1	5
	MTHFD1	0	0	4	0	1	5
	NAB2	0	0	4	0	1	5
	NACC1	0	0	0	4	1	5
	NBN	0	0	0	4	1	5
	NCBP1	0	0	4	0	1	5
	NELF-E	0	4	0	0	1	5
	NELFCD	0	0	4	0	1	5
	NFKB2	0	0	4	0	1	5
	NHR-116	4	0	0	0	1	5
	NHR-23	4	0	0	0	1	5
	NHR-76	4	0	0	0	1	5
	NR1D2	0	0	0	4	1	5
	NRIP1	0	0	4	0	1	5
	OPA	0	4	0	0	1	5
	PAN-ACETYLLYSINE	0	0	4	0	1	5
	PFM2	0	0	4	0	1	5
	PHF5A	0	0	0	4	1	5
	POLR3C	0	0	4	0	1	5
	PQM-1	4	0	0	0	1	5
	PRMT1	0	0	4	0	1	5
	PTEN	0	0	4	0	1	5
	RAF1	0	0	0	4	1	5
	RALY	0	0	0	4	1	5
	RBP1	0	4	0	0	1	5
	RFX1	0	0	0	4	1	5
	RING1	0	0	4	0	1	5
	RORA	0	0	0	4	1	5
	RRP40	0	4	0	0	1	5
	RRP6	0	4	0	0	1	5
	SFMBT	0	4	0	0	1	5
	SFMBT2	0	0	0	4	1	5
	SHEP	0	4	0	0	1	5
	SIRT3	0	0	4	0	1	5
	SLBP	0	0	4	0	1	5
	SMARCAD1	0	0	0	4	1	5
	SMC-4	4	0	0	0	1	5
	SP9	0	0	0	4	1	5
	STAT5	0	0	4	0	1	5
	SU(H)	0	4	0	0	1	5
	SUCCINYLLYSINE	0	0	0	4	1	5
	SUPT20H	0	0	4	0	1	5
	TAZ	0	0	4	0	1	5
	TBL1X	0	0	0	4	1	5
	TBR1	0	0	0	4	1	5
	TBX3	0	0	0	4	1	5
	TERF2	0	0	4	0	1	5
	TFCP2	0	0	4	0	1	5
	TFIIB	0	4	0	0	1	5
	TFIIIC	0	4	0	0	1	5
	TIN	0	4	0	0	1	5
	TP73	0	0	4	0	1	5
	TTF1	0	0	0	4	1	5
	UNC-130	4	0	0	0	1	5
	UNC-39	4	0	0	0	1	5
	WAS	0	0	0	4	1	5
	WDHD1	0	0	4	0	1	5
	WIZ	0	0	0	4	1	5
	XRCC5	0	0	4	0	1	5
	YKI	0	4	0	0	1	5
	ZFH1	0	4	0	0	1	5
	ZFP191	0	0	0	4	1	5
	ZNF768	0	0	4	0	1	5
	ADNP	0	0	0	3	1	4
	AOP	0	3	0	0	1	4
	APC	0	0	3	0	1	4
	ARRB1	0	0	3	0	1	4
	ASH-2	3	0	0	0	1	4
	BCL3	0	0	3	0	1	4
	BR140	0	3	0	0	1	4
	BRD1	0	0	3	0	1	4
	CASP3	0	0	3	0	1	4
	CBX4	0	0	3	0	1	4
	CDK2	0	0	3	0	1	4
	CNOT1	0	0	0	3	1	4
	CROTONYL LYSINE	0	0	0	3	1	4
	CTBP2	0	0	3	0	1	4
	CXXC5	0	0	0	3	1	4
	DAF-16	3	0	0	0	1	4
	DPF3	0	0	0	3	1	4
	DROSHA	0	0	0	3	1	4
	DWG	0	3	0	0	1	4
	E4F1	0	0	0	3	1	4
	FO	0	0	0	3	1	4
	FOXP2	0	0	3	0	1	4
	GAD1	0	0	0	3	1	4
	GATAD1	0	0	3	0	1	4
	GCN5	0	3	0	0	1	4
	GT	0	3	0	0	1	4
	GTF2E2	0	0	0	3	1	4
	GUG	0	3	0	0	1	4
	HAT1	0	0	3	0	1	4
	HB	0	3	0	0	1	4
	HEPATITIS B VIRUS X ANTIGEN	0	0	3	0	1	4
	HOXB8	0	0	3	0	1	4
	HOXC11	0	0	3	0	1	4
	HOXC5	0	0	3	0	1	4
	HR78	0	3	0	0	1	4
	KR	0	3	0	0	1	4
	LAG-1	3	0	0	0	1	4
	LIN-53	3	0	0	0	1	4
	LIN28B	0	0	3	0	1	4
	MED	0	3	0	0	1	4
	MEF2	0	3	0	0	1	4
	MEPCE	0	0	3	0	1	4
	MORC3	0	0	0	3	1	4
	MRE-11	3	0	0	0	1	4
	MSL1	0	0	0	3	1	4
	NAP1L1	0	0	0	3	1	4
	NHR-25	3	0	0	0	1	4
	NLRP2	0	0	3	0	1	4
	NPP-3	3	0	0	0	1	4
	NR2F1	0	0	3	0	1	4
	NR3C2	0	0	3	0	1	4
	OEF-1	3	0	0	0	1	4
	PHOX2B	0	0	3	0	1	4
	PITA	0	3	0	0	1	4
	PLAG1	0	0	3	0	1	4
	PRDM13	0	0	0	3	1	4
	PRDM5	0	0	0	3	1	4
	PSPC1	0	0	0	3	1	4
	RFX3	0	0	0	3	1	4
	RSF1	0	3	0	0	1	4
	SGF11	0	3	0	0	1	4
	SMARCD1	0	0	0	3	1	4
	SNA	0	3	0	0	1	4
	SNAPC2	0	0	3	0	1	4
	SNAPC4	0	0	3	0	1	4
	SOX30	0	0	0	3	1	4
	SOX8	0	0	3	0	1	4
	SP2	0	0	3	0	1	4
	SRSF2	0	0	0	3	1	4
	STAT92E	0	3	0	0	1	4
	SU(VAR)3-9	0	3	0	0	1	4
	SUPT16H	0	0	3	0	1	4
	TAF7	0	0	3	0	1	4
	TAF7L	0	0	0	3	1	4
	TBL1XR1	0	0	3	0	1	4
	TET	0	3	0	0	1	4
	TRP63	0	0	0	3	1	4
	UNC-55	3	0	0	0	1	4
	WDR11	0	0	0	3	1	4
	WHSC1	0	0	3	0	1	4
	ZBED2	0	0	3	0	1	4
	ZHP-3	3	0	0	0	1	4
	ZIPIC	0	3	0	0	1	4
	AB	0	2	0	0	1	3
	ACAA2	0	0	0	2	1	3
	AHCY	0	0	0	2	1	3
	AHRR	0	0	2	0	1	3
	AIRE	0	0	0	2	1	3
	ALYREF	0	0	2	0	1	3
	ANP32E	0	0	0	2	1	3
	APOBEC3B	0	0	2	0	1	3
	ARID3B	0	0	2	0	1	3
	ARID5B	0	0	2	0	1	3
	ASUN	0	0	2	0	1	3
	ATM	0	0	0	2	1	3
	ATR	0	0	2	0	1	3
	BANP	0	0	2	0	1	3
	BARX1	0	0	2	0	1	3
	BCLAF1	0	0	2	0	1	3
	BRCA2	0	0	2	0	1	3
	BRM	0	2	0	0	1	3
	BRWD1	0	0	0	2	1	3
	BTAF1	0	0	0	2	1	3
	C10ORF12	0	0	2	0	1	3
	C16A3.4	2	0	0	0	1	3
	C17ORF49	0	0	2	0	1	3
	C17ORF96	0	0	2	0	1	3
	C34F6.9	2	0	0	0	1	3
	CAMTA1	0	0	2	0	1	3
	CAP-D3	0	2	0	0	1	3
	CBT	0	2	0	0	1	3
	CBX6	0	0	2	0	1	3
	CCAR2	0	0	2	0	1	3
	CCDC101	0	0	2	0	1	3
	CCND2	0	0	2	0	1	3
	CCNK	0	0	0	2	1	3
	CDC45L	0	2	0	0	1	3
	CDK6	0	0	2	0	1	3
	CDYL2	0	0	2	0	1	3
	CEH-16	2	0	0	0	1	3
	CEH-39	2	0	0	0	1	3
	CG	0	2	0	0	1	3
	CHAF1B	0	0	0	2	1	3
	CHAT	0	0	2	0	1	3
	CHD-3	2	0	0	0	1	3
	CHUK	0	0	0	2	1	3
	COBLL1	0	0	2	0	1	3
	CSE1L	0	0	2	0	1	3
	CSTF3	0	0	2	0	1	3
	CUFF	0	2	0	0	1	3
	CUX2	0	0	0	2	1	3
	DDX39B	0	0	2	0	1	3
	DEK	0	0	2	0	1	3
	DISCO	0	2	0	0	1	3
	DLX1	0	0	0	2	1	3
	DNAJ-1	0	2	0	0	1	3
	DNMT3L	0	0	0	2	1	3
	DUX4	0	0	2	0	1	3
	E(BX)	0	2	0	0	1	3
	EBV-ZEBRA	0	0	2	0	1	3
	EIF4AIII	0	2	0	0	1	3
	ELF2	0	0	2	0	1	3
	ELT-2	2	0	0	0	1	3
	EN	0	2	0	0	1	3
	EPC-1	2	0	0	0	1	3
	ERCC8	0	0	2	0	1	3
	ESR2	0	0	2	0	1	3
	ETV2	0	0	2	0	1	3
	EY	0	2	0	0	1	3
	F16B12.6	2	0	0	0	1	3
	F23B12.7	2	0	0	0	1	3
	FAM60A	0	0	0	2	1	3
	FBXO21	0	0	0	2	1	3
	FIP1L1	0	0	2	0	1	3
	FKH-2	2	0	0	0	1	3
	FOXA3	0	0	0	2	1	3
	FOXG1	0	0	0	2	1	3
	FOXO4	0	0	2	0	1	3
	FOXR2	0	0	2	0	1	3
	FXR1	0	0	2	0	1	3
	GADD45A	0	0	0	2	1	3
	GFZF	0	2	0	0	1	3
	GLI3	0	0	0	2	1	3
	GLIS3	0	0	0	2	1	3
	GMEB-1	2	0	0	0	1	3
	GRWD1	0	0	2	0	1	3
	GTF3C5	0	0	2	0	1	3
	HBZ	0	0	2	0	1	3
	HCP-4	2	0	0	0	1	3
	HDAC5	0	0	0	2	1	3
	HDACX	0	2	0	0	1	3
	HECTD1	0	0	2	0	1	3
	HES1	0	0	0	2	1	3
	HIC1	0	0	2	0	1	3
	HIM-17	2	0	0	0	1	3
	HIM-5	2	0	0	0	1	3
	HIM-8	2	0	0	0	1	3
	HMBOX1	0	0	2	0	1	3
	HMGA1	0	0	2	0	1	3
	HMGB1	0	0	2	0	1	3
	HMGN2	0	0	0	2	1	3
	HNRNPC	0	0	2	0	1	3
	HNRNPH1	0	0	2	0	1	3
	HNRNPLL	0	0	2	0	1	3
	HNRNPUL1	0	0	2	0	1	3
	HOPX	0	0	0	2	1	3
	HOXC10	0	0	0	2	1	3
	HOXC9	0	0	2	0	1	3
	HOXD11	0	0	2	0	1	3
	HP4	0	2	0	0	1	3
	HSP83	0	2	0	0	1	3
	HTATSF1	0	0	0	2	1	3
	HTH	0	2	0	0	1	3
	HTP-3	2	0	0	0	1	3
	IBF1	0	2	0	0	1	3
	IBF2	0	2	0	0	1	3
	IKZF2	0	0	0	2	1	3
	ING1	0	0	0	2	1	3
	INTS12	0	0	2	0	1	3
	KDM5D	0	0	2	0	1	3
	LET-607	2	0	0	0	1	3
	LID	0	2	0	0	1	3
	LIG4	0	0	2	0	1	3
	LINT-1	0	2	0	0	1	3
	LMD	0	2	0	0	1	3
	LMTK3	0	0	2	0	1	3
	LMX1B	0	0	0	2	1	3
	LRIF1	0	0	2	0	1	3
	LRRFIP1	0	0	0	2	1	3
	MAML1	0	0	2	0	1	3
	MAP1LC3B	0	0	2	0	1	3
	MAU-2	2	0	0	0	1	3
	MAU2	0	0	0	2	1	3
	MBD-R2	0	2	0	0	1	3
	MBD4	0	0	2	0	1	3
	MDM2	0	0	2	0	1	3
	MDT-15	2	0	0	0	1	3
	MED-1	2	0	0	0	1	3
	MED25	0	0	2	0	1	3
	MEF-2	2	0	0	0	1	3
	MEIOSIN	0	0	0	2	1	3
	MET-2	2	0	0	0	1	3
	MIF	0	0	2	0	1	3
	MIS-12	2	0	0	0	1	3
	MLF	0	2	0	0	1	3
	MLLT6	0	0	2	0	1	3
	MML-1	2	0	0	0	1	3
	MPND	0	0	0	2	1	3
	MRE11A	0	0	2	0	1	3
	MSH-5	2	0	0	0	1	3
	N6AMT1	0	0	2	0	1	3
	NAA10	0	0	0	2	1	3
	NCAPG2	0	0	2	0	1	3
	NCOA4	0	0	2	0	1	3
	NFIX	0	0	0	2	1	3
	NHR-10	2	0	0	0	1	3
	NHR-129	2	0	0	0	1	3
	NHR-2	2	0	0	0	1	3
	NHR-21	2	0	0	0	1	3
	NHR-67	2	0	0	0	1	3
	NKX3-2	0	0	0	2	1	3
	NME2	0	0	2	0	1	3
	NOT	0	2	0	0	1	3
	NOTCH3	0	0	2	0	1	3
	NR0B1	0	0	0	2	1	3
	NR0B2	0	0	0	2	1	3
	NUP107	0	2	0	0	1	3
	NUP214	0	0	2	0	1	3
	NUP93-1	0	2	0	0	1	3
	NXF1	0	0	2	0	1	3
	OGA	0	2	0	0	1	3
	OGDH	0	0	0	2	1	3
	PADI2	0	0	2	0	1	3
	PAN	0	2	0	0	1	3
	PAX-1	2	0	0	0	1	3
	PBXIP1	0	0	2	0	1	3
	PCBP1	0	0	2	0	1	3
	PCBP2	0	0	2	0	1	3
	PEB-1	2	0	0	0	1	3
	PHF20	0	0	0	2	1	3
	PIAS4	0	0	2	0	1	3
	PLAGL1	0	0	0	2	1	3
	POLH	0	0	2	0	1	3
	POLQ	0	0	2	0	1	3
	PPARD	0	0	0	2	1	3
	PRD	0	2	0	0	1	3
	PRDM11	0	0	2	0	1	3
	PRM1	0	0	0	2	1	3
	PRMT3	0	0	2	0	1	3
	PROS-1	2	0	0	0	1	3
	PRPF4	0	0	2	0	1	3
	PTBP1	0	0	2	0	1	3
	PYGO2	0	0	2	0	1	3
	QK	0	0	0	2	1	3
	RAI1	0	0	0	2	1	3
	RBBP7	0	0	2	0	1	3
	RBF	0	2	0	0	1	3
	RBFOX2	0	0	2	0	1	3
	RBM14	0	0	2	0	1	3
	RBM22	0	0	2	0	1	3
	RBM39	0	0	2	0	1	3
	RBPJL	0	0	0	2	1	3
	REC8	0	0	0	2	1	3
	RIF1	0	0	0	2	1	3
	RNF20	0	0	0	2	1	3
	ROX2	0	2	0	0	1	3
	RPC-1	2	0	0	0	1	3
	RTA	0	0	2	0	1	3
	RTF1	0	0	0	2	1	3
	RUMP	0	2	0	0	1	3
	SAG	0	0	2	0	1	3
	SAP18	0	0	0	2	1	3
	SATB2	0	0	0	2	1	3
	SC	0	2	0	0	1	3
	SCC-1	2	0	0	0	1	3
	SDC-1	2	0	0	0	1	3
	SEA-2	2	0	0	0	1	3
	SEM-4	2	0	0	0	1	3
	SET1	0	2	0	0	1	3
	SETX	0	0	2	0	1	3
	SHN	0	2	0	0	1	3
	SKP2	0	0	2	0	1	3
	SMA-9	2	0	0	0	1	3
	SMAD6	0	0	0	2	1	3
	SMARCC2	0	0	2	0	1	3
	SMARCE1	0	0	2	0	1	3
	SMC-6	2	0	0	0	1	3
	SMOX	0	2	0	0	1	3
	SMYD2	0	0	0	2	1	3
	SNAPC1	0	0	2	0	1	3
	SNRNP70	0	0	2	0	1	3
	SO	0	2	0	0	1	3
	SON	0	0	2	0	1	3
	SOX5	0	0	0	2	1	3
	SP110	0	0	0	2	1	3
	SP140	0	0	2	0	1	3
	SPIB	0	0	0	2	1	3
	SPT3	0	2	0	0	1	3
	SPTF-1	2	0	0	0	1	3
	SRPK1	0	0	2	0	1	3
	SRPK2	0	0	2	0	1	3
	SRSF3	0	0	2	0	1	3
	SRSF4	0	0	2	0	1	3
	SRSF7	0	0	2	0	1	3
	SRSF9	0	0	2	0	1	3
	SU(TPL)	0	2	0	0	1	3
	SUUR	0	2	0	0	1	3
	SVIL	0	0	2	0	1	3
	SVS-1	0	0	2	0	1	3
	TAF-1	2	0	0	0	1	3
	TAF1C	0	0	2	0	1	3
	TARDBP	0	0	2	0	1	3
	TBPL1	0	0	0	2	1	3
	TBX19	0	0	0	2	1	3
	TBX2	0	0	2	0	1	3
	TBX20	0	0	0	2	1	3
	TCEA2	0	0	2	0	1	3
	TEAD2	0	0	0	2	1	3
	TFDP1	0	0	2	0	1	3
	TFTC-3	2	0	0	0	1	3
	TFTC-5	2	0	0	0	1	3
	TLP-1	2	0	0	0	1	3
	TNNI2	0	0	0	2	1	3
	TOX	0	0	0	2	1	3
	TRMT112	0	0	2	0	1	3
	TRRAP	0	0	2	0	1	3
	TSU	0	2	0	0	1	3
	TTF2	0	0	2	0	1	3
	U2AF1	0	0	2	0	1	3
	U2AF2	0	0	2	0	1	3
	UBE2I	0	0	2	0	1	3
	UBP1	0	0	2	0	1	3
	UPSET	0	2	0	0	1	3
	USP	0	2	0	0	1	3
	UTF1	0	0	0	2	1	3
	UTX	0	2	0	0	1	3
	VELO	0	2	0	0	1	3
	VEZF1	0	0	2	0	1	3
	VSV-G	0	0	2	0	1	3
	W03F9.2	2	0	0	0	1	3
	WDR-5.1	2	0	0	0	1	3
	WDR61	0	0	0	2	1	3
	WDS	0	2	0	0	1	3
	WHSC1L1	0	0	0	2	1	3
	ZAF1	0	2	0	0	1	3
	ZEN	0	2	0	0	1	3
	ZFHX4	0	0	2	0	1	3
	ZFP-1	2	0	0	0	1	3
	ZFP335	0	0	0	2	1	3
	ZFY	0	0	2	0	1	3
	ZHX2	0	0	2	0	1	3
	ZIM-1	2	0	0	0	1	3
	ZIM-3	2	0	0	0	1	3
	ZIP-2	2	0	0	0	1	3
	ZIP-8	2	0	0	0	1	3
	ZKSCAN3	0	2	0	0	1	3
	ZKSCAN4	0	2	0	0	1	3
	ZNF12	0	0	2	0	1	3
	ZNF207	0	0	2	0	1	3
	ZNF217	0	0	2	0	1	3
	ZNF281	0	0	2	0	1	3
	ZNF384	0	0	2	0	1	3
	ZNF398	0	0	2	0	1	3
	ZNF532	0	0	2	0	1	3
	ZSCAN4C	0	0	0	2	1	3
	ZSCAN5A	0	0	2	0	1	3
	ZSCAN5D	0	0	2	0	1	3
	ZTF-7	2	0	0	0	1	3
	ZZZ3	0	0	2	0	1	3
	AATF	0	0	1	0	1	2
	ACTB	0	0	0	1	1	2
	ADNP2	0	0	1	0	1	2
	AHCTF1	0	0	1	0	1	2
	ALKBH1	0	0	1	0	1	2
	ALKBH3	0	0	1	0	1	2
	ARNT2	0	0	1	0	1	2
	ARNTL2	0	0	1	0	1	2
	ASF1A	0	0	1	0	1	2
	ASH2	0	1	0	0	1	2
	ASXL2	0	0	1	0	1	2
	ATF1	0	0	1	0	1	2
	ATF6	0	0	1	0	1	2
	BAZ2A	0	0	0	1	1	2
	BMI	0	0	1	0	1	2
	BPTF	0	0	1	0	1	2
	BRAF	0	0	1	0	1	2
	BRK	0	1	0	0	1	2
	BRWD3	0	1	0	0	1	2
	CAD	0	1	0	0	1	2
	CASP8AP2	0	0	1	0	1	2
	CCNT2	0	0	1	0	1	2
	CDC5L	0	0	1	0	1	2
	CDX1	0	0	1	0	1	2
	CDYL	0	0	0	1	1	2
	CEBPG	0	0	0	1	1	2
	CEBPZ	0	0	1	0	1	2
	CEC-7	1	0	0	0	1	2
	CG7099	0	1	0	0	1	2
	CHD3	0	0	1	0	1	2
	CIRH1A	0	0	0	1	1	2
	CNC	0	1	0	0	1	2
	CREB3L1	0	0	1	0	1	2
	CREBL2	0	0	1	0	1	2
	CSNK2A1	0	0	1	0	1	2
	CUL4A	0	0	1	0	1	2
	CYCLOBUTANE PYRIMIDINE DIMERS	0	0	1	0	1	2
	D	0	1	0	0	1	2
	DDX18	0	0	0	1	1	2
	DEAF1	0	0	1	0	1	2
	DFD	0	1	0	0	1	2
	DLL	0	1	0	0	1	2
	DLX3	0	0	0	1	1	2
	DMAP1	0	0	0	1	1	2
	DMRT2	0	0	1	0	1	2
	DMRTB1	0	0	0	1	1	2
	DNA2	0	0	1	0	1	2
	DNAJC2	0	0	0	1	1	2
	DONSON	0	0	1	0	1	2
	DPPA3	0	0	1	0	1	2
	DPY30	0	0	0	1	1	2
	DRAP1	0	0	1	0	1	2
	DSP1	0	1	0	0	1	2
	DTL	0	0	1	0	1	2
	E2F2	0	0	1	0	1	2
	E2F8	0	0	1	0	1	2
	EBNA3	0	0	1	0	1	2
	ELL3	0	0	0	1	1	2
	ERCC2	0	0	1	0	1	2
	ESG	0	1	0	0	1	2
	ETL1	0	1	0	0	1	2
	EVX1	0	0	1	0	1	2
	EXD	0	1	0	0	1	2
	F2RL1	0	0	1	0	1	2
	FANCM	0	0	1	0	1	2
	FER3	0	1	0	0	1	2
	FERD3L	0	0	1	0	1	2
	FOXC1	0	0	1	0	1	2
	FOXD3	0	0	1	0	1	2
	FOXF2	0	0	1	0	1	2
	FOXJ3	0	0	1	0	1	2
	FOXQ1	0	0	1	0	1	2
	FXR2	0	0	1	0	1	2
	GRO	0	1	0	0	1	2
	GSK3B	0	0	0	1	1	2
	GTF2A2	0	0	0	1	1	2
	GTF3C4	0	0	0	1	1	2
	GUCY1B3	0	0	1	0	1	2
	GZF1	0	0	1	0	1	2
	H	0	1	0	0	1	2
	HBX	0	0	0	1	1	2
	HDAC8	0	0	1	0	1	2
	HDAC9	0	0	1	0	1	2
	HES4	0	0	1	0	1	2
	HES5	0	0	1	0	1	2
	HES7	0	0	1	0	1	2
	HESX1	0	0	1	0	1	2
	HEY2	0	0	1	0	1	2
	HHEX	0	0	1	0	1	2
	HIM-3	1	0	0	0	1	2
	HIV TAT	0	0	1	0	1	2
	HIVEP3	0	0	1	0	1	2
	HKB	0	1	0	0	1	2
	HMGN1	0	0	1	0	1	2
	HMGN3	0	0	1	0	1	2
	HMGXB3	0	0	1	0	1	2
	HNF4	0	1	0	0	1	2
	HOXA4	0	0	1	0	1	2
	HOXA5	0	0	1	0	1	2
	HOXA6	0	0	1	0	1	2
	HOXB2	0	0	1	0	1	2
	HOXB5	0	0	1	0	1	2
	HOXB6	0	0	1	0	1	2
	HOXC13	0	0	1	0	1	2
	HOXC6	0	0	0	1	1	2
	HOXC8	0	0	1	0	1	2
	HOXD1	0	0	1	0	1	2
	HOXD4	0	0	1	0	1	2
	HOXD9	0	0	1	0	1	2
	HR39	0	1	0	0	1	2
	HR4	0	1	0	0	1	2
	HSP90B1	0	0	1	0	1	2
	ICE2	0	0	1	0	1	2
	ID1	0	0	1	0	1	2
	ID3	0	0	1	0	1	2
	ID4	0	0	1	0	1	2
	IGF1	0	0	1	0	1	2
	IKZF5	0	0	1	0	1	2
	ILF3	0	0	1	0	1	2
	ING2	0	0	1	0	1	2
	ING5	0	0	1	0	1	2
	INSM1	0	0	0	1	1	2
	IRX2	0	0	1	0	1	2
	IRX5	0	0	1	0	1	2
	ISL2	0	0	1	0	1	2
	ISWI	0	1	0	0	1	2
	JAZF1	0	0	1	0	1	2
	JDP2	0	0	1	0	1	2
	KCMF1	0	0	1	0	1	2
	KDM4D	0	0	0	1	1	2
	KLF1	0	0	1	0	1	2
	KLF10	0	0	1	0	1	2
	KLF11	0	0	1	0	1	2
	KLF13	0	0	1	0	1	2
	KLF15	0	0	1	0	1	2
	KN	0	1	0	0	1	2
	L3MBTL3	0	0	1	0	1	2
	LCOR	0	0	1	0	1	2
	LCORL	0	0	1	0	1	2
	LDB2	0	0	1	0	1	2
	LHX4	0	0	1	0	1	2
	LILLI	0	1	0	0	1	2
	LIN-42	1	0	0	0	1	2
	LMO3	0	0	1	0	1	2
	LOV	0	1	0	0	1	2
	LRWD1	0	0	1	0	1	2
	LYSIN HOMOCYSTEINE	0	0	0	1	1	2
	MAFA	0	0	0	1	1	2
	MBD3L2	0	0	1	0	1	2
	MCM3	0	0	1	0	1	2
	MCPV ST	0	0	1	0	1	2
	MEOX2	0	0	1	0	1	2
	MGEA5	0	0	1	0	1	2
	MIXL1	0	0	1	0	1	2
	MLL-AF4	0	0	1	0	1	2
	MLL-AF6	0	0	1	0	1	2
	MNX1	0	0	0	1	1	2
	MSC	0	0	1	0	1	2
	MTA3	0	0	1	0	1	2
	MTF1	0	0	1	0	1	2
	MXD3	0	0	1	0	1	2
	MYF6	0	0	1	0	1	2
	MYNN	0	0	1	0	1	2
	MYO1C	0	0	0	1	1	2
	MYOCD	0	0	1	0	1	2
	MYT1	0	0	0	1	1	2
	N	0	1	0	0	1	2
	NELFB	0	0	0	1	1	2
	NFE2L3	0	0	1	0	1	2
	NHLH1	0	0	1	0	1	2
	NKX2-3	0	0	1	0	1	2
	NKX2-8	0	0	1	0	1	2
	NOS2	0	0	1	0	1	2
	NPAS2	0	0	1	0	1	2
	NPAS3	0	0	0	1	1	2
	NPAT	0	0	1	0	1	2
	NPM1	0	0	1	0	1	2
	NPP-13	1	0	0	0	1	2
	NR1I2	0	0	1	0	1	2
	NR2E3	0	0	1	0	1	2
	NR2F6	0	0	1	0	1	2
	NR4A2	0	0	1	0	1	2
	NSL1	0	0	0	1	1	2
	NUCKS1	0	0	0	1	1	2
	OBOX1	0	0	0	1	1	2
	PALB2	0	0	1	0	1	2
	PBX2	0	0	1	0	1	2
	PBX4	0	0	1	0	1	2
	PCID2	0	1	0	0	1	2
	PCL	0	1	0	0	1	2
	PCNA	0	0	0	1	1	2
	PGBD5	0	0	1	0	1	2
	PHF20L1	0	0	1	0	1	2
	PHF7	0	0	0	1	1	2
	PITX3	0	0	1	0	1	2
	PPARGC1A	0	0	1	0	1	2
	PRAME	0	0	1	0	1	2
	PRDM4	0	0	1	0	1	2
	PSMB5	0	0	1	0	1	2
	PSMD1	0	0	1	0	1	2
	PWP1	0	0	0	1	1	2
	PZG	0	1	0	0	1	2
	RBL1	0	0	1	0	1	2
	RBP2	0	0	0	1	1	2
	RFX7	0	0	1	0	1	2
	RLF	0	0	1	0	1	2
	ROW	0	1	0	0	1	2
	RREB1	0	0	1	0	1	2
	SALL1	0	0	0	1	1	2
	SALL3	0	0	1	0	1	2
	SAP130	0	0	0	1	1	2
	SETD2	0	0	0	1	1	2
	SHOX2	0	0	0	1	1	2
	SIPA1	0	0	1	0	1	2
	SMAD5	0	0	1	0	1	2
	SMARCA1	0	0	1	0	1	2
	SMC4	0	0	1	0	1	2
	SMN1	0	0	1	0	1	2
	SMT3	0	1	0	0	1	2
	SNAPC5	0	0	1	0	1	2
	SOX13	0	0	0	1	1	2
	SOX21	0	0	1	0	1	2
	SP4	0	0	1	0	1	2
	SP7	0	0	0	1	1	2
	SRCAP	0	0	1	0	1	2
	STAB1	0	0	0	1	1	2
	STRA8	0	0	0	1	1	2
	TAF10	0	0	0	1	1	2
	TAF9B	0	0	0	1	1	2
	TBL1Y	0	0	1	0	1	2
	TBX4	0	0	0	1	1	2
	TCEA1	0	0	0	1	1	2
	TCF25	0	0	1	0	1	2
	TCFL5	0	0	1	0	1	2
	TDG	0	0	0	1	1	2
	TDRD3	0	0	1	0	1	2
	TFCP2L1	0	0	0	1	1	2
	TFEB	0	0	1	0	1	2
	TFIIA	0	1	0	0	1	2
	THAP1	0	0	1	0	1	2
	THAP4	0	0	1	0	1	2
	THOC5	0	0	0	1	1	2
	THRB	0	0	0	1	1	2
	TLE1	0	0	0	1	1	2
	TLL	0	1	0	0	1	2
	TMEM131	0	0	0	1	1	2
	TOE1	0	0	1	0	1	2
	TREM	0	1	0	0	1	2
	TRP47	0	0	1	0	1	2
	TSC1	0	0	1	0	1	2
	TSC22D3	0	0	0	1	1	2
	TSHZ1	0	0	1	0	1	2
	UBQN	0	1	0	0	1	2
	UHRF1	0	0	0	1	1	2
	UTP3	0	0	0	1	1	2
	UTP6	0	0	0	1	1	2
	VRK1	0	0	1	0	1	2
	VSX2	0	0	0	1	1	2
	WAPL	0	0	0	1	1	2
	WOC	0	1	0	0	1	2
	WRN	0	0	1	0	1	2
	WRNIP1	0	0	1	0	1	2
	WWTR1	0	0	1	0	1	2
	ZBTB10	0	0	1	0	1	2
	ZBTB21	0	0	1	0	1	2
	ZBTB39	0	0	1	0	1	2
	ZBTB4	0	0	1	0	1	2
	ZBTB44	0	0	1	0	1	2
	ZBTB7B	0	0	0	1	1	2
	ZC3H10	0	0	0	1	1	2
	ZC3H4	0	0	1	0	1	2
	ZC3H8	0	0	1	0	1	2
	ZCCHC11	0	0	1	0	1	2
	ZEB2	0	0	1	0	1	2
	ZFP217	0	0	0	1	1	2
	ZFP322A	0	0	0	1	1	2
	ZFP708	0	0	0	1	1	2
	ZHX3	0	0	1	0	1	2
	ZIC3	0	0	0	1	1	2
	ZMYM2	0	0	1	0	1	2
	ZMYM3	0	0	1	0	1	2
	ZNF165	0	0	1	0	1	2
	ZNF219	0	0	1	0	1	2
	ZNF266	0	0	1	0	1	2
	ZNF280D	0	0	1	0	1	2
	ZNF3	0	0	1	0	1	2
	ZNF331	0	0	1	0	1	2
	ZNF334	0	0	1	0	1	2
	ZNF335	0	0	1	0	1	2
	ZNF395	0	0	1	0	1	2
	ZNF486	0	0	1	0	1	2
	ZNF516	0	0	1	0	1	2
	ZNF544	0	0	1	0	1	2
	ZNF581	0	0	1	0	1	2
	ZNF639	0	0	1	0	1	2
	ZNF750	0	0	1	0	1	2
	ZNF76	0	0	1	0	1	2
	ZNF83	0	0	1	0	1	2
	ZNF84	0	0	1	0	1	2
	ZNF92	0	0	1	0	1	2
	ZSCAN29	0	0	1	0	1	2
	cg	0	2	0	0	1	3
	chd-3	2	0	0	0	1	3
	cuff	0	2	0	0	1	3
	disco	0	2	0	0	1	3
	eIF4AIII	0	2	0	0	1	3
	elt-2	2	0	0	0	1	3
	en	0	2	0	0	1	3
	epc-1	2	0	0	0	1	3
	ey	0	2	0	0	1	3
	fkh-2	2	0	0	0	1	3
	gfzf	0	2	0	0	1	3
	gmeb-1	2	0	0	0	1	3
	hcp-4	2	0	0	0	1	3
	him-17	2	0	0	0	1	3
	him-5	2	0	0	0	1	3
	him-8	2	0	0	0	1	3
	hth	0	2	0	0	1	3
	htp-3	2	0	0	0	1	3
	let-607	2	0	0	0	1	3
	lid	0	2	0	0	1	3
	lmd	0	2	0	0	1	3
	mau-2	2	0	0	0	1	3
	mdt-15	2	0	0	0	1	3
	med-1	2	0	0	0	1	3
	mef-2	2	0	0	0	1	3
	met-2	2	0	0	0	1	3
	mis-12	2	0	0	0	1	3
	mml-1	2	0	0	0	1	3
	msh-5	2	0	0	0	1	3
	nhr-10	2	0	0	0	1	3
	nhr-129	2	0	0	0	1	3
	nhr-2	2	0	0	0	1	3
	nhr-21	2	0	0	0	1	3
	nhr-67	2	0	0	0	1	3
	not	0	2	0	0	1	3
	pan	0	2	0	0	1	3
	pax-1	2	0	0	0	1	3
	peb-1	2	0	0	0	1	3
	prd	0	2	0	0	1	3
	pros-1	2	0	0	0	1	3
	roX2	0	2	0	0	1	3
	rpc-1	2	0	0	0	1	3
	rump	0	2	0	0	1	3
	sc	0	2	0	0	1	3
	scc-1	2	0	0	0	1	3
	sdc-1	2	0	0	0	1	3
	sea-2	2	0	0	0	1	3
	sem-4	2	0	0	0	1	3
	shn	0	2	0	0	1	3
	sma-9	2	0	0	0	1	3
	smc-6	2	0	0	0	1	3
	so	0	2	0	0	1	3
	sptf-1	2	0	0	0	1	3
	taf-1	2	0	0	0	1	3
	tftc-3	2	0	0	0	1	3
	tftc-5	2	0	0	0	1	3
	tlp-1	2	0	0	0	1	3
	tsu	0	2	0	0	1	3
	upSET	0	2	0	0	1	3
	usp	0	2	0	0	1	3
	velo	0	2	0	0	1	3
	wdr-5.1	2	0	0	0	1	3
	wds	0	2	0	0	1	3
	zen	0	2	0	0	1	3
	zfp-1	2	0	0	0	1	3
	zim-1	2	0	0	0	1	3
	zim-3	2	0	0	0	1	3
	zip-2	2	0	0	0	1	3
	zip-8	2	0	0	0	1	3
	ztf-7	2	0	0	0	1	3
	AATF	0	0	1	0	1	2
	ADNP2	0	0	1	0	1	2
	AHCTF1	0	0	1	0	1	2
	AICDA	0	0	1	0	1	2
	ALKBH1	0	0	1	0	1	2
	ALKBH3	0	0	1	0	1	2
	ARNT2	0	0	1	0	1	2
	ARNTL2	0	0	1	0	1	2
	ASF1A	0	0	1	0	1	2
	ASXL1	0	0	1	0	1	2
	ASXL2	0	0	1	0	1	2
	ATF1	0	0	1	0	1	2
	ATF6	0	0	1	0	1	2
	ATF7	0	0	1	0	1	2
	ATF7IP	0	0	1	0	1	2
	AUTS2	0	0	1	0	1	2
	Actb	0	0	0	1	1	2
	Arid4b	0	0	0	1	1	2
	Atf7ip	0	0	0	1	1	2
	BBX	0	0	1	0	1	2
	BHLHE41	0	0	1	0	1	2
	BMI	0	0	1	0	1	2
	BPTF	0	0	1	0	1	2
	BRAF	0	0	1	0	1	2
	BRWD3	0	1	0	0	1	2
	Baz2a	0	0	0	1	1	2
	Bcl11a	0	0	0	1	1	2
	Brf1	0	0	0	1	1	2
	Brf2	0	0	0	1	1	2
	CASP8AP2	0	0	1	0	1	2
	CBFA2T2	0	0	1	0	1	2
	CCNT2	0	0	1	0	1	2
	CDC5L	0	0	1	0	1	2
	CDC73	0	0	1	0	1	2
	CDX1	0	0	1	0	1	2
	CEBPZ	0	0	1	0	1	2
	CG7099	0	1	0	0	1	2
	CHD3	0	0	1	0	1	2
	CREB3L1	0	0	1	0	1	2
	CREBL2	0	0	1	0	1	2
	CRY1	0	0	1	0	1	2
	CSNK2A1	0	0	1	0	1	2
	CTR9	0	0	1	0	1	2
	CUL4A	0	0	1	0	1	2
	Carm1	0	0	0	1	1	2
	Cdk7	0	0	0	1	1	2
	Cdyl	0	0	0	1	1	2
	Cebpg	0	0	0	1	1	2
	Cirh1a	0	0	0	1	1	2
	Cry1	0	0	0	1	1	2
	Cyclobutane pyrimidine dimers	0	0	1	0	1	2
	D	0	1	0	0	1	2
	DEAF1	0	0	1	0	1	2
	DICER1	0	0	1	0	1	2
	DMRT2	0	0	1	0	1	2
	DNA2	0	0	1	0	1	2
	DONSON	0	0	1	0	1	2
	DPPA3	0	0	1	0	1	2
	DR1	0	0	1	0	1	2
	DRAP1	0	0	1	0	1	2
	DTL	0	0	1	0	1	2
	Ddx18	0	0	0	1	1	2
	Ddx21	0	0	0	1	1	2
	Dfd	0	1	0	0	1	2
	Dicer1	0	0	0	1	1	2
	Dll	0	1	0	0	1	2
	Dlx3	0	0	0	1	1	2
	Dmap1	0	0	0	1	1	2
	Dmrtb1	0	0	0	1	1	2
	Dnajc2	0	0	0	1	1	2
	Dpy30	0	0	0	1	1	2
	Dsp1	0	1	0	0	1	2
	E2F2	0	0	1	0	1	2
	E2F3	0	0	1	0	1	2
	E2F8	0	0	1	0	1	2
	EBNA3	0	0	1	0	1	2
	ELF4	0	0	1	0	1	2
	ELK3	0	0	1	0	1	2
	ELL	0	0	1	0	1	2
	ERCC2	0	0	1	0	1	2
	ERCC3	0	0	1	0	1	2
	ETS2	0	0	1	0	1	2
	ETV5	0	0	1	0	1	2
	ETV6	0	0	1	0	1	2
	EVX1	0	0	1	0	1	2
	Ehf	0	0	0	1	1	2
	Ell	0	0	0	1	1	2
	Ell3	0	0	0	1	1	2
	Ercc3	0	0	0	1	1	2
	Etl1	0	1	0	0	1	2
	F2RL1	0	0	1	0	1	2
	FANCM	0	0	1	0	1	2
	FERD3L	0	0	1	0	1	2
	FOSB	0	0	1	0	1	2
	FOXC1	0	0	1	0	1	2
	FOXD3	0	0	1	0	1	2
	FOXF2	0	0	1	0	1	2
	FOXJ2	0	0	1	0	1	2
	FOXJ3	0	0	1	0	1	2
	FOXQ1	0	0	1	0	1	2
	FXR2	0	0	1	0	1	2
	Fer3	0	1	0	0	1	2
	GFI1	0	0	1	0	1	2
	GLI1	0	0	1	0	1	2
	GPS2	0	0	1	0	1	2
	GUCY1B3	0	0	1	0	1	2
	GZF1	0	0	1	0	1	2
	Gsk3b	0	0	0	1	1	2
	Gtf2a2	0	0	0	1	1	2
	Gtf2f1	0	0	0	1	1	2
	Gtf3c2	0	0	0	1	1	2
	Gtf3c4	0	0	0	1	1	2
	HBx	0	0	0	1	1	2
	HDAC8	0	0	1	0	1	2
	HDAC9	0	0	1	0	1	2
	HES4	0	0	1	0	1	2
	HES5	0	0	1	0	1	2
	HES7	0	0	1	0	1	2
	HESX1	0	0	1	0	1	2
	HEY2	0	0	1	0	1	2
	HEYL	0	0	1	0	1	2
	HHEX	0	0	1	0	1	2
	HIC2	0	0	1	0	1	2
	HIV Tat	0	0	1	0	1	2
	HIVEP3	0	0	1	0	1	2
	HMGN1	0	0	1	0	1	2
	HMGN3	0	0	1	0	1	2
	HMGXB3	0	0	1	0	1	2
	HOXA11	0	0	1	0	1	2
	HOXA13	0	0	1	0	1	2
	HOXA4	0	0	1	0	1	2
	HOXA5	0	0	1	0	1	2
	HOXA6	0	0	1	0	1	2
	HOXB1	0	0	1	0	1	2
	HOXB2	0	0	1	0	1	2
	HOXB4	0	0	1	0	1	2
	HOXB5	0	0	1	0	1	2
	HOXB6	0	0	1	0	1	2
	HOXC13	0	0	1	0	1	2
	HOXC8	0	0	1	0	1	2
	HOXD1	0	0	1	0	1	2
	HOXD13	0	0	1	0	1	2
	HOXD4	0	0	1	0	1	2
	HOXD9	0	0	1	0	1	2
	HSP90B1	0	0	1	0	1	2
	Hnf4	0	1	0	0	1	2
	Hnrnpk	0	0	0	1	1	2
	Hoxc6	0	0	0	1	1	2
	Hoxd13	0	0	0	1	1	2
	Hr39	0	1	0	0	1	2
	Hr4	0	1	0	0	1	2
	ICE2	0	0	1	0	1	2
	ID1	0	0	1	0	1	2
	ID2	0	0	1	0	1	2
	ID3	0	0	1	0	1	2
	ID4	0	0	1	0	1	2
	IGF1	0	0	1	0	1	2
	IKZF5	0	0	1	0	1	2
	ILF3	0	0	1	0	1	2
	ING2	0	0	1	0	1	2
	ING5	0	0	1	0	1	2
	IRX2	0	0	1	0	1	2
	IRX5	0	0	1	0	1	2
	ISL2	0	0	1	0	1	2
	Insm1	0	0	0	1	1	2
	Irf2bp2	0	0	0	1	1	2
	Iswi	0	1	0	0	1	2
	JAZF1	0	0	1	0	1	2
	JDP2	0	0	1	0	1	2
	Jmjd6	0	0	0	1	1	2
	KAT8	0	0	1	0	1	2
	KCMF1	0	0	1	0	1	2
	KDM2A	0	0	1	0	1	2
	KLF1	0	0	1	0	1	2
	KLF10	0	0	1	0	1	2
	KLF11	0	0	1	0	1	2
	KLF13	0	0	1	0	1	2
	KLF15	0	0	1	0	1	2
	Kdm4d	0	0	0	1	1	2
	Klf3	0	0	0	1	1	2
	L3MBTL3	0	0	1	0	1	2
	LCOR	0	0	1	0	1	2
	LCORL	0	0	1	0	1	2
	LDB2	0	0	1	0	1	2
	LHX2	0	0	1	0	1	2
	LHX4	0	0	1	0	1	2
	LHX5	0	0	1	0	1	2
	LHX6	0	0	1	0	1	2
	LMO3	0	0	1	0	1	2
	LRWD1	0	0	1	0	1	2
	Lhx5	0	0	0	1	1	2
	Lysin homocysteine	0	0	0	1	1	2
	MBD1	0	0	1	0	1	2
	MBD3L2	0	0	1	0	1	2
	MCM3	0	0	1	0	1	2
	MCPV ST	0	0	1	0	1	2
	MEF2D	0	0	1	0	1	2
	MEOX2	0	0	1	0	1	2
	MGEA5	0	0	1	0	1	2
	MIXL1	0	0	1	0	1	2
	MLL-AF4	0	0	1	0	1	2
	MLL-AF6	0	0	1	0	1	2
	MSC	0	0	1	0	1	2
	MTA3	0	0	1	0	1	2
	MTF1	0	0	1	0	1	2
	MXD3	0	0	1	0	1	2
	MYBL1	0	0	1	0	1	2
	MYF5	0	0	1	0	1	2
	MYF6	0	0	1	0	1	2
	MYNN	0	0	1	0	1	2
	MYOCD	0	0	1	0	1	2
	Mafa	0	0	0	1	1	2
	Mafb	0	0	0	1	1	2
	Mnx1	0	0	0	1	1	2
	Mtor	0	0	0	1	1	2
	Myo1c	0	0	0	1	1	2
	Myt1	0	0	0	1	1	2
	N	0	1	0	0	1	2
	NEUROD2	0	0	1	0	1	2
	NFAT5	0	0	1	0	1	2
	NFE2L1	0	0	1	0	1	2
	NFE2L3	0	0	1	0	1	2
	NFIB	0	0	1	0	1	2
	NFKBIA	0	0	1	0	1	2
	NFYC	0	0	1	0	1	2
	NHLH1	0	0	1	0	1	2
	NKX2-3	0	0	1	0	1	2
	NKX2-8	0	0	1	0	1	2
	NKX6-1	0	0	1	0	1	2
	NOS2	0	0	1	0	1	2
	NPAS2	0	0	1	0	1	2
	NPAT	0	0	1	0	1	2
	NPM1	0	0	1	0	1	2
	NR1D1	0	0	1	0	1	2
	NR1I2	0	0	1	0	1	2
	NR2E3	0	0	1	0	1	2
	NR2F6	0	0	1	0	1	2
	NR4A2	0	0	1	0	1	2
	NUP153	0	0	1	0	1	2
	Nelfb	0	0	0	1	1	2
	Nfatc2	0	0	0	1	1	2
	Nfyb	0	0	0	1	1	2
	Nfyc	0	0	0	1	1	2
	Nono	0	0	0	1	1	2
	Npas3	0	0	0	1	1	2
	Nsl1	0	0	0	1	1	2
	Nucks1	0	0	0	1	1	2
	Nup153	0	0	0	1	1	2
	OGT	0	0	1	0	1	2
	Obox1	0	0	0	1	1	2
	Ovol2	0	0	0	1	1	2
	PALB2	0	0	1	0	1	2
	PARK7	0	0	1	0	1	2
	PAX7	0	0	1	0	1	2
	PAXIP1	0	0	1	0	1	2
	PBX2	0	0	1	0	1	2
	PBX4	0	0	1	0	1	2
	PCGF5	0	0	1	0	1	2
	PCGF6	0	0	1	0	1	2
	PCID2	0	1	0	0	1	2
	PGBD5	0	0	1	0	1	2
	PHF20L1	0	0	1	0	1	2
	PHF6	0	0	1	0	1	2
	PITX1	0	0	1	0	1	2
	PITX3	0	0	1	0	1	2
	POU2F3	0	0	1	0	1	2
	PPARA	0	0	1	0	1	2
	PPARGC1A	0	0	1	0	1	2
	PRAME	0	0	1	0	1	2
	PRDM10	0	0	1	0	1	2
	PRDM4	0	0	1	0	1	2
	PSMB5	0	0	1	0	1	2
	PSMD1	0	0	1	0	1	2
	Park7	0	0	0	1	1	2
	Pcl	0	1	0	0	1	2
	Pcna	0	0	0	1	1	2
	Phc1	0	0	0	1	1	2
	Phf2	0	0	0	1	1	2
	Phf7	0	0	0	1	1	2
	Prmt5	0	0	0	1	1	2
	Pwp1	0	0	0	1	1	2
	RAG2	0	0	1	0	1	2
	RBBP4	0	0	1	0	1	2
	RBL1	0	0	1	0	1	2
[truncated: 143 more rows]

## Sheet: H2B
		hg38->mm10			dm6->mm10			hg38->dm6			mm10->dm6			mm10->hg38			dm6->hg38
	method	acc	prAUC	rocAUC	acc	prAUC	rocAUC	acc	prAUC	rocAUC	acc	prAUC	rocAUC	acc	prAUC	rocAUC	acc	prAUC	rocAUC
	src_only	64.227	78.379	75.78	55.757	60.131	55.437	55.903	57.8	44.872	39.633	45.948	38.987	62.5	65.118	56.533	47.388	45.717	31.538
	adda	63.98	68.676	68.148	44.408	45.418	43.531	57.688	58.87	45.299	44.345	49.573	42.022	53.951	63.756	57.319	32.768	45.597	31.422
	afn	66.941	79.656	78.167	54.276	59.597	54.811	54.315	56.795	44.036	38.963	49.797	38.9	67.143	75.731	65.631	55.067	55.924	40.393
	cdan	61.349	69.602	69.804	46.299	46.238	44.157	49.132	51.643	44.159	48.065	51.201	42.98	57.009	60.698	56.904	41.116	38.266	28.045
	dan	65.543	79.02	77.997	45.312	47.077	42.914	44.767	47.826	39.72	48.735	49.736	42.493	59.04	60.573	55.677	41.518	48.788	34.924
	dann	62.418	67.547	68.776	43.586	49.906	45.426	49.653	54.948	43.821	46.577	50.395	44.078	53.839	57.594	55.136	47.478	48.889	38.357
	jan	54.441	61.81	57.174	46.299	50.12	45.005	47.594	55.339	41.362	48.363	50.834	41.188	54.241	56.565	51.625	36.049	37.524	22.206
	mcc	67.402	77.114	75.163	46.569	48.505	43.672	47.743	54.803	42.368	44.246	52.271	40.566	56.138	61.374	52.764	33.849	37.602	20.837
	mcd	61.266	76.504	75.225	53.043	58.982	56.241	51.562	52.841	42.147	42.386	49.065	40.118	65.714	70.589	60.019	40.603	39.946	26
	mdd	66.118	78.77	79.127	53.947	57.002	53.986	55.258	57.961	44.935	43.304	52.39	41.75	64.241	66.546	58.54	51.607	49.739	36.774

## Sheet: H3K23ac
		hg38->mm10			ce11->mm10			hg38->ce11			mm10->ce11			mm10->hg38			ce11->hg38
	method	acc	prAUC	rocAUC	acc	prAUC	rocAUC	acc	prAUC	rocAUC	acc	prAUC	rocAUC	acc	prAUC	rocAUC	acc	prAUC	rocAUC
	src_only	85.354	93.759	92.699	64.599	76.118	79.976	52.134	52.289	45.254	57.165	60.713	53.072	83.516	91.705	89.689	68.867	83.3	83.481
	adda	81.851	86.34	85.657	64.835	75.276	77.265	57.546	58.764	56.312	62.5	63.748	61.108	82.978	86.235	84.532	72.983	86.686	84.496
	afn	84.894	93.301	92.221	72.111	79.583	81.725	54.268	54.368	50.824	50.915	57.497	51.745	83.044	92.822	90.253	74.116	84.77	83.6
	cdan	80.908	83.906	87.632	71.344	83.219	84.612	49.619	49.304	45.326	51.067	58.496	54.618	74.728	78.879	81.778	69.415	86.06	83.577
	dan	86.592	94.919	94.243	70.825	74.402	79.814	47.79	48.111	44.671	50.534	53.72	48.895	80.415	86.407	86.815	70.266	81.388	81.989
	dann	77.866	78.111	83.74	67.795	75.75	76.986	52.287	51.813	47.503	52.439	56.675	54.151	73.933	80.649	83.063	70.174	85.593	83.425
	jan	75.767	80.878	84.692	74.599	86.014	85.317	51.372	47.646	45.646	52.515	59.112	53.336	73.344	69.346	77.162	70.074	84.221	82.092
	mcc	85.993	94.421	93.675	65.402	82.255	81.876	52.402	53.063	53.494	53.979	58.904	51.17	82.936	92.539	90.649	68.907	84.56	81.723
	mcd	85.366	93.798	92.82	69.233	65.615	73.07	52.287	50.761	48.006	53.582	56.65	54.496	82.566	91.627	90.456	70.3	65.86	73.012
	mdd	84.67	93.506	92.313	71.981	81.221	81.551	50.991	49.36	48.826	50.457	52.185	49.947	81.565	90.867	89.158	68.357	84.594	83.522

## Sheet: H3K36ac
		hg38->mm10			ce11->mm10			hg38->ce11			mm10->ce11			mm10->hg38			ce11->hg38
	method	acc	prAUC	rocAUC	acc	prAUC	rocAUC	acc	prAUC	rocAUC	acc	prAUC	rocAUC	acc	prAUC	rocAUC	acc	prAUC	rocAUC
	src_only	80.077	90.248	90.285	46.12	44.843	43.408	54.578	54.178	57.94	50.004	52.594	54.978	72.156	82.171	80.108	48.568	48.893	47.131
	adda	73.689	89.145	89.541	41.378	37.767	28.641	50.527	49.507	50.272	50.461	49.35	50.318	69.765	77.72	76.755	42.155	39.239	31.53
	afn	81.327	90.21	90.403	38.025	37.396	27.824	53.225	52.795	55.574	50.652	53.117	55.27	71.527	81.057	79.493	40.29	39.277	32.167
	cdan	75.878	82.87	86.144	54.205	52.682	55.134	56.794	55.24	59.296	50.34	49	51.856	69.466	72.88	75.745	61.279	62.267	65.299
	dan	80.8	90.69	90.943	48.81	47.558	45.055	55.901	52.86	57.257	49.045	48.129	49.975	72.041	81.775	79.129	45.781	45.643	41.26
	dann	76.223	81.916	85.804	50.253	49.983	49.543	56.138	53.537	57.507	49.842	49.456	51.654	67.857	73.343	75.341	56.152	55.809	58.169
	jan	75.936	86.404	87.085	47.806	47.629	45.928	57.288	53.327	58.171	51.577	49.823	52.604	65.913	72.039	73.263	54.792	56.492	57.014
	mcc	81.142	90.687	90.673	50.037	49.847	49.789	56.629	54.285	58.572	50.41	50.956	53.997	72.575	82.36	81.164	49.434	49.886	48.71
	mcd	80.415	89.797	89.932	44.06	40.472	34.95	53.648	51.044	55.285	49.896	51.016	54.148	71.553	81.653	80.289	35.916	38.474	29.878
	mdd	81.349	90.496	90.781	41.629	37.713	28.554	51.718	49.291	51.842	49.747	49.616	52.112	71.248	81.243	79.193	42.176	39.121	31.259

[truncated: 6 more sheets: H3K36me1, H3K79me1, Histone mark results, Sheet1, Supplementary HM, Supplementary TF]
