# Supplementary material for: Unsupervised domain adaptation methods for cross-species transfer of regulatory code signals
Source: Front Big Data. 2023 Mar 30;6:1140663. doi: 10.3389/fdata.2023.1140663 (PMC10101332; doi:10.3389/fdata.2023.1140663)
Supplement: Supplementary file 2 [file Table_2.XLSX]

## Sheet: Sheet1
Supplementary Table 2. Sizes of ChiP-seq data sets
Antigen type	Antigen name	Cell info	hg38 size	mm10 size
His	H3K27AC	Blood.B_cells	28560	48872
His	H3K27AC	Blood.CD4+_T_cells	40408	47262
His	H3K27AC	Blood.CD8+_T_cells	26815	40040
His	H3K27AC	Blood.Dendritic_Cells	30369	37067
His	H3K27AC	Blood.Erythroblasts	30784	48020
His	H3K27AC	Blood.Hematopoietic_Stem_Cells	36640	50365
His	H3K27AC	Blood.Macrophages	60420	55515
His	H3K27AC	Blood.Mast_Cells	49771	52795
His	H3K27AC	Breast.Mammary_glands	59358	59886
His	H3K27AC	Cardiovascular.Heart_Ventricles	56684	60763
His	H3K27AC	Liver.Hepatocytes	56704	34373
His	H3K27AC	Neural.Cerebellum	61303	45569
His	H3K27AC	Neural.Neural_Stem_Cells	50089	31826
His	H3K27AC	Neural.Neuroblastoma	47361	50859
His	H3K27AC	Pancreas.Pancreatic_adenocarcinoma	31793	50324
His	H3K27AC	Pancreas.Pancreatic_ductal_adenocarcinoma	43839	57100
His	H3K27AC	Pluripotent_stem_cell.ES_cells	37001	61749
His	H3K27AC	Pluripotent_stem_cell.iPS_cells	56972	41174
His	H3K27AC	Prostate.Prostate	61071	36017
His	H3K4ME1	Blood.CD4+_T_cells	50134	60395
His	H3K4ME1	Blood.Hematopoietic_Stem_Cells	45142	59078
His	H3K4ME1	Blood.Macrophages	25627	61569
His	H3K4ME1	Blood.Monocytes	58110	53113
His	H3K4ME1	Blood.Neutrophils	48824	28026
His	H3K4ME1	Liver.Hepatocytes	62051	61942
His	H3K4ME1	Pluripotent_stem_cell.iPS_cells	28108	59487
His	H3K4ME2	Blood.CD4+_T_cells	26165	29758
His	H3K4ME2	Blood.Granulocytes	41412	53951
His	H3K4ME2	Blood.Hematopoietic_Stem_Cells	35209	31005
His	H3K4ME2	Breast.Mammary_glands	46144	27715
His	H3K4ME2	Neural.Retina	44720	53962
His	H3K4ME2	Pluripotent_stem_cell.iPS_cells	44443	62474
His	H3K4ME3	Blood.B_cells	33350	37729
His	H3K4ME3	Blood.CD4+_T_cells	43487	45417
His	H3K4ME3	Blood.CD4_CD8_double_positive_cells	27061	30234
His	H3K4ME3	Blood.CD8+_T_cells	33921	33430
His	H3K4ME3	Blood.Dendritic_Cells	41682	33196
His	H3K4ME3	Blood.Hematopoietic_Stem_Cells	32655	30766
His	H3K4ME3	Blood.Macrophages	60598	44485
His	H3K4ME3	Blood.Mast_Cells	29639	31855
His	H3K4ME3	Blood.Th1_Cells	30338	59020
His	H3K4ME3	Blood.Th2_Cells	30216	25576
His	H3K4ME3	Blood.Thymus	25381	31588
His	H3K4ME3	Breast.Mammary_epithelial_cells	42527	26577
His	H3K4ME3	Breast.Mammary_glands	27870	34952
His	H3K4ME3	Liver.Hepatocytes	43974	62319
His	H3K4ME3	Liver.Liver	58655	57131
His	H3K4ME3	Lung.Lung	51359	33899
His	H3K4ME3	Neural.Neural_Stem_Cells	25561	31246
His	H3K4ME3	Pluripotent_stem_cell.ES_cells	51424	62330
His	H3K4ME3	Pluripotent_stem_cell.iPS_cells	40526	59646
His	H3K4ME3	Prostate.Prostate	35981	32208
His	H3K9ME3	Pluripotent_stem_cell.ES_cells	26511	58000
His	H3K9ME3	Pluripotent_stem_cell.iPS_cells	31174	42495
TFs	CTCF	Blood.B_cells	49828	60902
TFs	CTCF	Blood.Erythroid_Cells	56086	35383
TFs	CTCF	Kidney.Kidney	36776	47808
TFs	CTCF	Lung.Lung	28898	31557
TFs	CTCF	Neural.Retina	28905	25920
TFs	CTCF	Pluripotent_stem_cell.ES_cells	45693	61564
TFs	RAD21	Blood.Macrophages	29699	46041
TFs	SPI1	Blood.Dendritic_Cells	44689	44036
TFs	SPI1	Blood.Hematopoietic_Stem_Cells	29094	58802
TFs	SPI1	Blood.Macrophages	56223	62293
TFs	SPI1	Blood.Neutrophils	39454	56593
TFs	TBX21	Blood.Th1_Cells	54399	28033
